# Supplementary material
Source: PubMed Central journal article supplement (PMC3753807)
Supplement: NIHMS487966-supplement-1_si_001.pdf [file NIHMS487966-supplement-1_si_001.pdf]

**The Supporting Information for  
Global atmospheric emission inventory of polycyclic aromatic hydrocarbon from 1960 to  
2008**

Huizhong Shen, Ye Huang, Rong Wang, Dan Zhu, Wei Li, Guofeng Shen, Bin Wang, Yanyan Zhang, Yuanchen  
Chen, Yan Lu, Han Chen, Tongchao Li, Kang Sun, Bengang Li, Wenxin Liu, Junfeng Liu, Shu Tao\*

*Laboratory for Earth Surface Processes, College of Urban and Environmental Sciences, Peking University,  
Beijing 100871, China.*

\* Corresponding author phone and fax: 0086-10-62751938, email: taos@pku.edu.cn.

**This material includes 31 pages, 7 tables, and 12 figures.**

## List of Tables

- S1. Detailed information on 69 PKU-PAH sources.
- S2. Regression coefficients,  $p$ , and  $R^2$  of the monivariate regression models for predicting  $EF$  of individual PAHs based on  $GDP_c$ .
- S3. List of 28 emission sources with technology splits.
- S4. List of coefficients to simulate the ratio of prebaked/(prebaked+soderberg) within primary aluminum production for each country.
- S5. Emission factors and geometric standard deviations of 16 PAHs for various sources.
- S6. World emissions of 16 PAHs in 2007.
- S7. Regional PAH16 emissions by sectors in 2007.

## List of Figures

- S1. Jackknifed  $R^2$  by removing 20% randomly selected data points each time for 500 times.
- S2. Means, 10th, 25th, 75th, and 90th percentiles of the resulting jackknifed coefficients of the determination for each PAH compound.
- S3. Time trends of PAH16  $EF$ s of three typical sources for several representative countries including the United States, Germany, Russia, India, and China.
- S4. Comparison in total PAH emissions from major sources between 2 global inventories for 2004.
- S5. Comparison in composition profiles among the 3 inventories.
- S6. Source profiles of BaPeq emissions in 2007.
- S7. Geographical distributions of anthropogenic PAH emissions from urban and rural areas.
- S8. Map of Relative Potential Health Effect (RPHE) from all sources.
- S9. Comparison of relative contributions based on three evaluation methods.
- S10. Comparison between the PKU-PAH and the inventories previously published.
- S11. Comparison of annual PAH emissions between our results and USEPA reported values.
- S12. Comparison of emission time trends for the total of 4 high molecular weight PAHs (BaP, BbF, BkF, and IcdP) with those reported by EMEP (European Monitoring and Evaluation Programme) for each of 27 European countries from 1990 to 2008

### S1. Summary of 69 PKU-PAH sources.

For the total 69 sources adopted in PKU-PAH emission inventory, detailed descriptions were listed in [Table S1](#). Sources were divided into 6 socioeconomic sectors (energy production, industry, transportation, commercial/residential sources, agriculture, and natural sources, see “**Sector**” column) or 6 categories (as 5 combustion sectors of coal, petroleum, natural gas, solid wastes, and biomass, and an industrial process sector, see “**Category**” column). The “**No.**” column included in [Table S1](#), [Table S3](#), and [Table S5](#) were uniform source index in order to make source information easier to retrieve.

**Table S1. Detailed information on 69 PKU-PAH sources**

| Sector            | No. | Category | Activity                     | Activity density index      | 2007 high-resolution emission inventory | historical emission inventory |
|-------------------|-----|----------|------------------------------|-----------------------------|-----------------------------------------|-------------------------------|
|                   |     |          |                              |                             | Activity Data Source                    | activity data source          |
| Energy production | 1   | coal     | anthracite consumed          | fuel consumption            | 1                                       | 4                             |
|                   | 2   | coal     | bituminous coal consumed     | fuel consumption            | 1                                       | 4                             |
|                   | 3   | coal     | lignite consumed             | fuel consumption            | 1                                       | 4                             |
|                   | 4   | coal     | coking coal consumed         | fuel consumption            | 1                                       | 4                             |
|                   | 5   | coal     | peat consumed                | fuel consumption            | 1                                       | 4                             |
|                   | 6   | oil      | gas/diesel consumed          | fuel consumption            | 1                                       | 4                             |
|                   | 7   | oil      | residue fuel oil consumed    | fuel consumption            | 1                                       | 4                             |
|                   | 8   | biomass  | solid biomass consumed       | fuel consumption            | 1                                       | 4                             |
|                   | 9   | biomass  | biogas consumed              | fuel consumption            | 1                                       | 4                             |
|                   | 10  | waste    | municipal waste consumed     | fuel consumption            | 1                                       | 4                             |
|                   | 11  | waste    | industrial waste consumed    | fuel consumption            | 1                                       | 4                             |
|                   | 12  | gas      | dry natural gas consumed     | fuel consumption            | 1                                       | 4                             |
|                   | 13  | oil      | natural gas liquid consumed  | fuel consumption            | 1                                       | 4                             |
| Industry          | 14  | process  | petroleum catalytic cracking | catalytic cracking capacity | 2 <sup>a</sup>                          | 2                             |
|                   | 15  | process  | coke production              | coke production             | 1                                       | 4                             |
|                   | 16  | process  | brick production             | brick production            | 1                                       | 5                             |
|                   | 17  | process  | primary Al production        | primary Al production       | 1                                       | 6                             |
|                   | 18  | gas      | gas flaring                  | gas flaring mass            | 1                                       | 7                             |
|                   | 19  | process  | iron sintering               | pig iron production         | 3 <sup>b</sup>                          | 3                             |
|                   | 20  | process  | electric arc furnace         | crude steel production      | 3 <sup>b</sup>                          | 3                             |
|                   | 21  | process  | open hearth furnace          | crude steel production      | 3 <sup>b</sup>                          | 3                             |
|                   | 22  | process  | oxygen blown converter       | crude steel production      | 3 <sup>b</sup>                          | 3                             |
|                   | 23  | process  | hot rolling                  | hot rolled steel production | 3 <sup>b</sup>                          | 3                             |
|                   | 24  | oil      | gas/diesel consumed          | fuel consumption            | 1                                       | 4                             |
|                   | 25  | coal     | anthracite consumed          | fuel consumption            | 1                                       | 4                             |
|                   | 26  | coal     | coking coal consumed         | fuel consumption            | 1                                       | 4                             |
|                   | 27  | coal     | bituminous coal consumed     | fuel consumption            | 1                                       | 4                             |
|                   | 28  | coal     | lignite consumed             | fuel consumption            | 1                                       | 4                             |
|                   | 29  | coal     | peat consumed                | fuel consumption            | 1                                       | 4                             |
|                   | 30  | oil      | residue fuel oil consumed    | fuel consumption            | 1                                       | 4                             |
|                   | 31  | biomass  | solid biomass consumed       | fuel consumption            | 1                                       | 4                             |

|                             |    |         |                               |                     |   |     |
|-----------------------------|----|---------|-------------------------------|---------------------|---|-----|
|                             | 32 | biomass | biogas consumed               | fuel consumption    | 1 | 4   |
|                             | 33 | waste   | municipal waste consumed      | fuel consumption    | 1 | 4   |
|                             | 34 | waste   | industrial waste consumed     | fuel consumption    | 1 | 4   |
|                             | 35 | gas     | dry natural gas consumed      | fuel consumption    | 1 | 4   |
|                             | 36 | oil     | natural gas liquid consumed   | fuel consumption    | 1 | 4   |
| Residential<br>& commercial | 37 | waste   | non-organized waste burning   | waste burned        | 1 | 8   |
|                             | 38 | coal    | anthracite consumed           | fuel consumption    | 1 | 4   |
|                             | 39 | coal    | coking coal consumed          | fuel consumption    | 1 | 4   |
|                             | 40 | coal    | bituminous coal consumed      | fuel consumption    | 1 | 4   |
|                             | 41 | coal    | lignite consumed              | fuel consumption    | 1 | 4   |
|                             | 42 | coal    | peat consumed                 | fuel consumption    | 1 | 4   |
|                             | 43 | gas     | liquid petroleum gas consumed | fuel consumption    | 1 | 4   |
|                             | 44 | gas     | dry natural gas consumed      | fuel consumption    | 1 | 4   |
|                             | 45 | oil     | natural gas liquid consumed   | fuel consumption    | 1 | 4   |
|                             | 46 | oil     | kerosene consumed             | fuel consumption    | 1 | 4   |
|                             | 47 | gas     | biogas consumed               | fuel consumption    | 1 | 4   |
|                             | 48 | biomass | indoor firewood burning       | fuel consumption    | 1 | 4,9 |
|                             | 49 | biomass | indoor crop residue burning   | fuel consumption    | 1 | 4,9 |
|                             | 50 | biomass | indoor dung cake burning      | fuel consumption    | 1 | 10  |
| Transportation              | 51 | oil     | vehicle gasoline              | fuel consumption    | 1 | 4   |
|                             | 52 | oil     | vehicle diesel                | fuel consumption    | 1 | 4   |
|                             | 53 | biomass | vehicle liquid biofuels       | fuel consumption    | 1 | 4   |
|                             | 54 | oil     | aviation gasoline             | fuel consumption    | 1 | 4   |
|                             | 55 | oil     | jet kerosene                  | fuel consumption    | 1 | 4   |
|                             | 56 | oil     | ocean tanker                  | fuel consumption    | 1 | 11  |
|                             | 57 | oil     | ocean container               | fuel consumption    | 1 | 11  |
|                             | 58 | oil     | ocean bulk & combined carries | fuel consumption    | 1 | 11  |
|                             | 59 | oil     | general-cargo vessels         | fuel consumption    | 1 | 11  |
|                             | 60 | oil     | non-cargo vessels             | fuel consumption    | 1 | 11  |
|                             | 61 | oil     | auxiliary engines             | fuel consumption    | 1 | 11  |
|                             | 62 | oil     | military vessels              | fuel consumption    | 1 | 11  |
| Agriculture                 | 63 | waste   | agriculture waste burning     | crop residue burned | 1 | 9   |
|                             | 64 | oil     | gas/diesel                    | fuel consumption    | 1 | 4   |
| Natural                     | 65 | biomass | forest fire                   | dry matter burned   | 1 | 12  |
|                             | 66 | biomass | deforestation fire            | dry matter burned   | 1 | 12  |
|                             | 67 | biomass | peat fire                     | dry matter burned   | 1 | 12  |
|                             | 68 | biomass | woodland fire                 | dry matter burned   | 1 | 12  |
|                             | 69 | biomass | savanna fire                  | dry matter burned   | 1 | 12  |

**Note:**

*a.* Country-level activity data for petroleum catalytic cracking was derived from U.S. EIA<sup>2</sup>. The spatial allocation for each country was based on gas flaring source from PKU-FUEL, due to a lack of facility location information.

*b.* Country-level activity data for iron and steel sources was derived from WSA<sup>3</sup>. The spatial allocation for each country was based on industrial coal combustion from PKU-FUEL, due to a lack of facility location information.

## S2. Regression models for transportation sector

The monivariate regression models<sup>13</sup> to predict  $EF_{PAH}$  (mg/t) for individual PAHs based on  $GDP_c$  (1000 USD) are expressed with the equation below:

$$\log(EF_{icy}) = k_i \times GDP_{cy} + C_i,$$

where  $EF_{icy}$  (mg/t) is the  $EF_{PAHs}$  of compound  $i$  for  $y$  model year vehicles produced in country  $c$ ;  $k_i$  and  $C_i$  are the model slope and interception for compound  $i$ , representing the rate of emission reduction against socioeconomic development and  $EF_{PAHs}$  for the vehicles without any control, respectively;  $GDP_{cy}$  represents the  $GDP_c$  of a given country  $c$  in year  $y$  in 1000 USD. The calculated results of these coefficients, together with  $p$  values and  $R^2$  are listed in Table S2. To evaluate the robustness of the regression model, jackknife tests were performed 500 times for each compound, with deletion of 20% data points randomly selected from the dataset each time. Distributions of the resulting jackknifed coefficients of the determination are shown in Figure S1 and Figure S2. Generally, the robustness of the regression model could be confirmed. For ships and aircrafts, due to limited numbers of PAH  $EFs$ , we simply used the origin  $k_i$  and revised  $C_i$  derived from the regression models of motor vehicles.

**Table S2.** Regression coefficients,  $p$ , and  $R^2$  of the monivariate regression models for predicting  $EF$  of individual PAHs based on  $GDP_c$ .

| PAH                                                   | NAP                  | ACY                  | ACE                  | FLO         | PHE         | ANT         | FLA         | PYR         | BaA         | CHR         | BbF         | BkF         | BaP         | IcdP        | DahA        | BghiP       |
|-------------------------------------------------------|----------------------|----------------------|----------------------|-------------|-------------|-------------|-------------|-------------|-------------|-------------|-------------|-------------|-------------|-------------|-------------|-------------|
| <i>On-road motor vehicles</i> (Source No. 51, 52, 53) |                      |                      |                      |             |             |             |             |             |             |             |             |             |             |             |             |             |
| $k_i$                                                 | -0.0501              | -0.0594              | -0.0391              | -0.0543     | -0.0636     | -0.0642     | -0.0658     | -0.0584     | -0.0575     | -0.0584     | -0.0501     | -0.0635     | -0.0581     | -0.0572     | -0.0722     | -0.0605     |
| $C_{i51-53}$                                          | 5.16                 | 3.93                 | 2.92                 | 3.67        | 4.00        | 3.25        | 3.41        | 3.46        | 2.48        | 2.56        | 2.31        | 2.42        | 2.42        | 2.26        | 1.76        | 2.54        |
| $p$                                                   | $1.6 \times 10^{-8}$ | $4.3 \times 10^{-9}$ | $1.6 \times 10^{-5}$ | $<10^{-10}$ | $<10^{-10}$ | $<10^{-10}$ | $<10^{-10}$ | $<10^{-10}$ | $<10^{-10}$ | $<10^{-10}$ | $<10^{-10}$ | $<10^{-10}$ | $<10^{-10}$ | $<10^{-10}$ | $<10^{-10}$ | $<10^{-10}$ |
| $R^2$                                                 | 0.210                | 0.237                | 0.142                | 0.266       | 0.344       | 0.307       | 0.402       | 0.305       | 0.241       | 0.313       | 0.252       | 0.323       | 0.317       | 0.265       | 0.416       | 0.320       |
| <i>Ships</i> (Source No. 56-62) <sup>a</sup>          |                      |                      |                      |             |             |             |             |             |             |             |             |             |             |             |             |             |
| $C_{i56-59,62}$                                       | 2.13                 | 0.39                 | 0.49                 | 0.33        | 1.13        | 0.29        | -0.11       | 0.54        | -0.40       | -0.15       | -0.68       | -0.50       | -0.37       | 0.07        | 0.21        | -0.31       |
| $C_{i60}$                                             | 1.30                 | -0.06                | -0.06                | 0.27        | 0.79        | -0.41       | -0.04       | -0.06       | -1.00       | -0.59       | -1.03       | -0.94       | -1.43       | -1.48       | -0.40       | -1.37       |
| $C_{i61}$                                             | 1.16                 | -1.37                | -1.25                | -0.23       | 0.39        | -1.13       | -0.82       | -1.00       | -1.56       | -1.37       | -2.03       | -1.71       | -1.68       | -1.27       | -1.02       | -1.13       |
| <i>Aircrafts</i> (Source No. 54, 55) <sup>a</sup>     |                      |                      |                      |             |             |             |             |             |             |             |             |             |             |             |             |             |
| $C_{i54,55}$                                          | 5.16                 | 3.93                 | 2.92                 | 3.67        | 4.00        | 3.25        | 3.41        | 3.46        | 2.48        | 2.56        | 2.31        | 2.42        | 2.42        | 2.26        | 1.76        | 2.54        |

**Note:**

<sup>a</sup>. For ships and aircrafts, the coefficients  $k_i$  from motor vehicles were used directly.

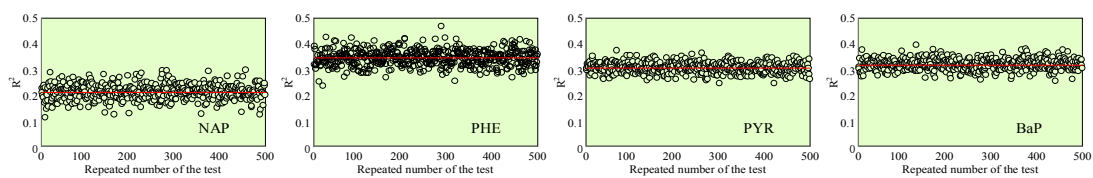

Figure S1. Jackknifed R2 by removing 20% randomly selected data points each time for 500 times. The results for NAP, PHE, PYR, and BaP are presented as four representative compounds. The red horizontal line represents the R2 derived from the final model without deletion.

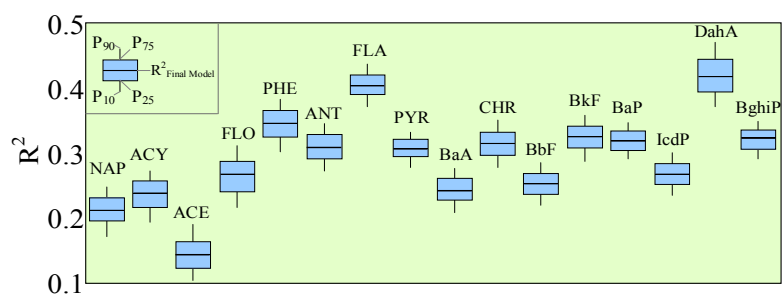

Figure S2. Means, 10th, 25th, 75th, and 90th percentiles of the resulting jackknifed coefficients of the determination for each PAH compound.

### S3. Parameterization for technology splits

With technology split method, each source was divided into 2 or more technology divisions, assuming that *EFs* for each technology division remain stable, and fractions of various technology divisions changed over time.<sup>14</sup> The time-depending fractions of these technology divisions were either derived from literatures or calculated using a series of S-shape curves. The form often used is:

$$X(t) = (X_0 - X_f)e^{-(t-t_0)^2/2s^2} + X_f,$$

where  $X_0$  and  $X_f$  are initial and final fractions of a certain technology division, respectively;  $t_0$  is the start time of the technology transition, and  $s$  is a rate.<sup>14</sup> Within PKU-PAH inventory, this method was applied to 28 sources including industrial activities and anthropogenic biomass burning. Each of the 28 sources was divided into 2 or 3 technology divisions without or with different emission mitigation measures. To apply this method, the total of 222 countries/territories were classified into 5 categories : 1) the United States and Canada, 2) other developed countries (39 countries), 3) former USSR federals (14 countries), 4) China, 5) all other developing countries (166 countries). All Parameters for S-shape curves in this study were listed in [Table S3](#) and [Table S4](#). Although, each technology division associates with a constant *EF* for each individual compound, the average *EF* for a certain source may change over time due to changes of fractions of its technology divisions. [Figure S3](#) illustrated these kinds of changes of average *EFs* over time for some typical sources. The parameterization for global emission estimation could also be used for compounds with wash-out mechanism similar to PAHs. It should be noticed that parameters listed in [Table S3](#) only provide a region-level technology transition framework, so if detail information could be got for certain countries and sources in the future, it is suggested to replace the simulation results, referring to the case of beehive coking in China<sup>15</sup> and global primary Al producing (see [Table S4](#)).





**Table S4.** List of coefficients to simulate the ratio of prebaked/(prebaked+soderberg) within primary aluminum production for each country.<sup>a</sup>

| Country        | X0 | Xf | t0   | s    |
|----------------|----|----|------|------|
| Austria        | 0  | 1  | 2000 | 1.0  |
| Azerbaijan     | 0  | 1  | 2000 | 1.0  |
| Brazil         | 0  | 1  | 1982 | 16.7 |
| Cameroon       | 0  | 1  | 1998 | 2.4  |
| Canada         | 0  | 1  | 1918 | 51.9 |
| China          | 0  | 1  | 1952 | 31.9 |
| Croatia        | 0  | 1  | 2000 | 1.0  |
| Czech Republic | 0  | 1  | 2000 | 1.0  |
| Egypt          | 0  | 1  | 1996 | 3.0  |
| France         | 0  | 1  | 1991 | 4.2  |
| Germany        | 0  | 1  | 1992 | 4.2  |
| Hungary        | 0  | 1  | 2000 | 1.0  |
| India          | 0  | 1  | 1950 | 31.9 |
| Indonesia      | 0  | 1  | 1998 | 2.4  |
| Japan          | 0  | 1  | 2000 | 1.0  |
| North Korea    | 0  | 1  | 2000 | 1.0  |
| South Korea    | 0  | 1  | 2000 | 1.0  |
| Kuwait         | 0  | 1  | 2000 | 1.0  |
| Macedonia      | 0  | 1  | 2000 | 1.0  |
| Mexico         | 0  | 1  | 2000 | 1.0  |
| Norway         | 0  | 1  | 1980 | 17.7 |
| Poland         | 0  | 1  | 1998 | 6.4  |
| Russia         | 0  | 1  | 1970 | 53.2 |
| South Africa   | 0  | 1  | 1987 | 5.3  |
| Spain          | 0  | 1  | 1965 | 33.2 |
| Suriname       | 0  | 1  | 2000 | 1.0  |
| Sweden         | 0  | 1  | 1982 | 21.5 |
| Ukraine        | 0  | 1  | 2000 | 1.0  |
| United Kingdom | 0  | 1  | 1965 | 12.2 |
| United States  | 0  | 1  | 1965 | 21.5 |

**Note:**

*a.* The simulation coefficients was based on reported data from two time points, 1998 and 2007.<sup>16,17</sup> For other countries, the ratios, prebaked/(prebaked+soderberg), were set to be 1 constantly according to these reports.

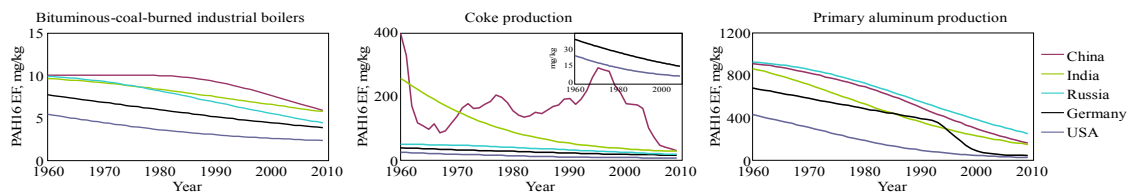

Figure S3. Time trends of PAH16 EFs of three typical sources for several representative countries including the United States, Germany, Russia, India, and China. The emission sources are Bituminous-coal-burned industrial boilers, coke production, and primary aluminum production from left to right, respectively.

#### S4. Emission factors adopted in PKU-PAH inventory.

PAH *EF* values and geometric standard variations of all sources (sources without technology splits) or sub-sources (sources with technology splits) are presented in [Table S5a](#) and [S5b](#).

The “No.” column showed uniform source indexes, in accord with “No.” column in [Table S1](#) and [S3](#).

**Table S5a. Emission factors of 16 PAHs for various sources.**

| No. <sup>a</sup> | units                    | sub-source           | NAP                  | ACY                  | ACE                  | FLO                  | PHE                  | ANT                  | FLA                  | PYR                  | BaA                  | CHR                  | BbF                  | BkF                  | BaP                  | IcdP                 | DahA                 | BghiP                |
|------------------|--------------------------|----------------------|----------------------|----------------------|----------------------|----------------------|----------------------|----------------------|----------------------|----------------------|----------------------|----------------------|----------------------|----------------------|----------------------|----------------------|----------------------|----------------------|
| 1~5              | mg/t fuel consumed       | uncontrol            | 2.0×10 <sup>1</sup>  | 4.3×10 <sup>-1</sup> | 1.2×10 <sup>0</sup>  | 2.0×10 <sup>0</sup>  | 1.3×10 <sup>1</sup>  | 1.2×10 <sup>0</sup>  | 4.0×10 <sup>0</sup>  | 2.6×10 <sup>0</sup>  | 4.7×10 <sup>-1</sup> | 1.7×10 <sup>0</sup>  | 1.1×10 <sup>0</sup>  | 8.1×10 <sup>-1</sup> | 1.2×10 <sup>0</sup>  | 1.1×10 <sup>0</sup>  | 3.7×10 <sup>-1</sup> | 8.3×10 <sup>-1</sup> |
|                  |                          | control              | 2.7×10 <sup>0</sup>  | 8.2×10 <sup>-2</sup> | 2.0×10 <sup>-1</sup> | 3.3×10 <sup>-1</sup> | 1.2×10 <sup>0</sup>  | 1.1×10 <sup>-1</sup> | 3.4×10 <sup>-1</sup> | 1.7×10 <sup>-1</sup> | 2.4×10 <sup>-2</sup> | 5.0×10 <sup>-2</sup> | 2.3×10 <sup>-2</sup> | 2.3×10 <sup>-2</sup> | 1.4×10 <sup>-2</sup> | 1.5×10 <sup>-2</sup> | 1.1×10 <sup>-2</sup> | 1.4×10 <sup>-2</sup> |
| 6,7,13           | g/TJ fuel consumed       |                      | 3.3×10 <sup>2</sup>  | 2.7×10 <sup>0</sup>  | 2.6×10 <sup>0</sup>  | 2.0×10 <sup>0</sup>  | 6.2×10 <sup>0</sup>  | 1.2×10 <sup>0</sup>  | 3.8×10 <sup>0</sup>  | 2.9×10 <sup>0</sup>  | 5.0×10 <sup>0</sup>  | 4.8×10 <sup>-1</sup> | 9.0×10 <sup>-1</sup> | 2.0×10 <sup>0</sup>  | 1.4×10 <sup>0</sup>  | 9.2×10 <sup>-1</sup> | 2.2×10 <sup>0</sup>  | 1.1×10 <sup>0</sup>  |
| 8                | mg/t fuel consumed       | uncontrol            | 7.6×10 <sup>0</sup>  | 2.7×10 <sup>-1</sup> | 1.6×10 <sup>-2</sup> | 9.8×10 <sup>-2</sup> | 8.9×10 <sup>-2</sup> | 5.3×10 <sup>-2</sup> | 3.5×10 <sup>-2</sup> | 1.9×10 <sup>-1</sup> | 3.2×10 <sup>-2</sup> | 5.0×10 <sup>-2</sup> | 4.0×10 <sup>-1</sup> | 3.7×10 <sup>-1</sup> | 2.2×10 <sup>-3</sup> | 1.8×10 <sup>-2</sup> | 0.0×10 <sup>0</sup>  | 4.0×10 <sup>-2</sup> |
|                  |                          | control              | 1.0×10 <sup>0</sup>  | 5.2×10 <sup>-2</sup> | 2.6×10 <sup>-3</sup> | 1.6×10 <sup>-2</sup> | 8.4×10 <sup>-3</sup> | 4.8×10 <sup>-3</sup> | 3.1×10 <sup>-3</sup> | 1.2×10 <sup>-2</sup> | 1.7×10 <sup>-3</sup> | 1.5×10 <sup>-3</sup> | 8.9×10 <sup>-3</sup> | 1.1×10 <sup>-2</sup> | 2.5×10 <sup>-5</sup> | 2.5×10 <sup>-4</sup> | 0.0×10 <sup>0</sup>  | 6.8×10 <sup>-4</sup> |
| 9                | g/TJ fuel consumed       |                      | 1.9×10 <sup>-3</sup> | 1.4×10 <sup>-4</sup> | 1.6×10 <sup>-3</sup> | 8.6×10 <sup>-5</sup> | 1.6×10 <sup>-4</sup> | 1.0×10 <sup>-5</sup> | 4.1×10 <sup>-5</sup> | 5.2×10 <sup>-5</sup> | 8.8×10 <sup>-5</sup> | 9.7×10 <sup>-5</sup> | 9.7×10 <sup>-5</sup> | 9.7×10 <sup>-5</sup> | 6.7×10 <sup>-5</sup> | 5.2×10 <sup>-5</sup> | 3.6×10 <sup>-5</sup> | 1.1×10 <sup>-4</sup> |
| 10,11            | g/TJ fuel consumed       | uncontrol            | 7.2×10 <sup>0</sup>  | 2.7×10 <sup>0</sup>  | 2.1×10 <sup>-1</sup> | 2.4×10 <sup>0</sup>  | 5.6×10 <sup>-1</sup> | 5.2×10 <sup>-1</sup> | 2.3×10 <sup>-1</sup> | 1.5×10 <sup>0</sup>  | 1.3×10 <sup>0</sup>  | 1.1×10 <sup>0</sup>  | 5.8×10 <sup>-1</sup> | 3.1×10 <sup>0</sup>  | 7.3×10 <sup>-1</sup> | 1.1×10 <sup>0</sup>  | 6.4×10 <sup>-1</sup> | 2.3×10 <sup>0</sup>  |
|                  |                          | control              | 9.9×10 <sup>-1</sup> | 5.1×10 <sup>-1</sup> | 3.5×10 <sup>-2</sup> | 4.0×10 <sup>-1</sup> | 5.3×10 <sup>-2</sup> | 4.8×10 <sup>-2</sup> | 2.0×10 <sup>-2</sup> | 9.8×10 <sup>-2</sup> | 6.7×10 <sup>-2</sup> | 3.1×10 <sup>-2</sup> | 1.3×10 <sup>-2</sup> | 8.8×10 <sup>-2</sup> | 8.3×10 <sup>-3</sup> | 1.5×10 <sup>-2</sup> | 1.9×10 <sup>-2</sup> | 3.9×10 <sup>-2</sup> |
| 12               | g/TJ fuel consumed       |                      | 1.9×10 <sup>-2</sup> | 1.4×10 <sup>-3</sup> | 1.6×10 <sup>-2</sup> | 8.6×10 <sup>-4</sup> | 1.6×10 <sup>-3</sup> | 1.0×10 <sup>-4</sup> | 4.1×10 <sup>-4</sup> | 5.2×10 <sup>-4</sup> | 8.8×10 <sup>-4</sup> | 9.7×10 <sup>-4</sup> | 9.7×10 <sup>-4</sup> | 9.7×10 <sup>-4</sup> | 6.7×10 <sup>-4</sup> | 5.2×10 <sup>-4</sup> | 3.6×10 <sup>-4</sup> | 1.1×10 <sup>-3</sup> |
| 14               | kg/barrel capacity       | uncontrol            | 6.0×10 <sup>-7</sup> | 0.0×10 <sup>0</sup>  | 0.0×10 <sup>0</sup>  | 0.0×10 <sup>0</sup>  | 1.3×10 <sup>-4</sup> | 6.9×10 <sup>-7</sup> | 3.4×10 <sup>-6</sup> | 4.7×10 <sup>-6</sup> | 0.0×10 <sup>0</sup>  | 0.0×10 <sup>0</sup>  | 0.0×10 <sup>0</sup>  | 0.0×10 <sup>0</sup>  | 9.1×10 <sup>-8</sup> | 0.0×10 <sup>0</sup>  | 0.0×10 <sup>0</sup>  | 8.4×10 <sup>-8</sup> |
|                  |                          | control              | 8.2×10 <sup>-8</sup> | 0.0×10 <sup>0</sup>  | 0.0×10 <sup>0</sup>  | 0.0×10 <sup>0</sup>  | 1.2×10 <sup>-5</sup> | 6.3×10 <sup>-8</sup> | 2.9×10 <sup>-7</sup> | 3.1×10 <sup>-7</sup> | 0.0×10 <sup>0</sup>  | 0.0×10 <sup>0</sup>  | 0.0×10 <sup>0</sup>  | 0.0×10 <sup>0</sup>  | 1.0×10 <sup>-9</sup> | 0.0×10 <sup>0</sup>  | 0.0×10 <sup>0</sup>  | 1.4×10 <sup>-9</sup> |
| 15               | g/t coke produced        | beehive              | 2.0×10 <sup>2</sup>  | 4.3×10 <sup>1</sup>  | 1.0×10 <sup>1</sup>  | 2.8×10 <sup>1</sup>  | 1.0×10 <sup>2</sup>  | 1.7×10 <sup>1</sup>  | 4.6×10 <sup>1</sup>  | 3.7×10 <sup>1</sup>  | 1.4×10 <sup>1</sup>  | 9.0×10 <sup>0</sup>  | 1.1×10 <sup>1</sup>  | 5.5×10 <sup>0</sup>  | 1.1×10 <sup>1</sup>  | 4.9×10 <sup>0</sup>  | 1.1×10 <sup>0</sup>  | 5.9×10 <sup>0</sup>  |
|                  |                          | mechanical-uncontrol | 2.0×10 <sup>1</sup>  | 5.5×10 <sup>0</sup>  | 5.4×10 <sup>-1</sup> | 2.7×10 <sup>0</sup>  | 7.6×10 <sup>0</sup>  | 2.0×10 <sup>0</sup>  | 3.3×10 <sup>0</sup>  | 4.4×10 <sup>0</sup>  | 9.5×10 <sup>-1</sup> | 9.0×10 <sup>-1</sup> | 5.8×10 <sup>-1</sup> | 4.9×10 <sup>-1</sup> | 7.5×10 <sup>-1</sup> | 3.0×10 <sup>-1</sup> | 4.3×10 <sup>-2</sup> | 3.4×10 <sup>-1</sup> |
|                  |                          | mechanical-control   | 1.6×10 <sup>0</sup>  | 5.6×10 <sup>-1</sup> | 2.7×10 <sup>-2</sup> | 4.0×10 <sup>-1</sup> | 4.9×10 <sup>-1</sup> | 2.0×10 <sup>-1</sup> | 2.3×10 <sup>-1</sup> | 3.5×10 <sup>-1</sup> | 3.8×10 <sup>-2</sup> | 4.4×10 <sup>-2</sup> | 2.7×10 <sup>-2</sup> | 2.4×10 <sup>-2</sup> | 3.8×10 <sup>-2</sup> | 1.4×10 <sup>-2</sup> | 2.3×10 <sup>-3</sup> | 1.6×10 <sup>-2</sup> |
| 16               | mg/t brick produced      | uncontrol            | 4.2×10 <sup>2</sup>  | 1.1×10 <sup>2</sup>  | 1.1×10 <sup>1</sup>  | 5.5×10 <sup>1</sup>  | 1.6×10 <sup>2</sup>  | 4.2×10 <sup>1</sup>  | 6.8×10 <sup>1</sup>  | 9.2×10 <sup>1</sup>  | 2.0×10 <sup>1</sup>  | 1.9×10 <sup>1</sup>  | 1.2×10 <sup>1</sup>  | 1.0×10 <sup>1</sup>  | 1.6×10 <sup>1</sup>  | 6.2×10 <sup>0</sup>  | 8.9×10 <sup>-1</sup> | 7.0×10 <sup>0</sup>  |
|                  |                          | control              | 3.3×10 <sup>1</sup>  | 1.2×10 <sup>1</sup>  | 5.6×10 <sup>-1</sup> | 8.3×10 <sup>0</sup>  | 1.0×10 <sup>1</sup>  | 4.0×10 <sup>0</sup>  | 4.8×10 <sup>0</sup>  | 7.2×10 <sup>0</sup>  | 7.9×10 <sup>-1</sup> | 9.0×10 <sup>-1</sup> | 5.7×10 <sup>-1</sup> | 5.1×10 <sup>-1</sup> | 7.9×10 <sup>-1</sup> | 3.0×10 <sup>-1</sup> | 4.7×10 <sup>-2</sup> | 3.4×10 <sup>-1</sup> |
| 17               | g/t Al produced          | prebaked-uncontrol   | 4.0×10 <sup>-1</sup> | 1.5×10 <sup>-2</sup> | 2.4×10 <sup>-1</sup> | 3.9×10 <sup>-1</sup> | 4.9×10 <sup>1</sup>  | 5.6×10 <sup>0</sup>  | 1.4×10 <sup>2</sup>  | 1.5×10 <sup>2</sup>  | 4.8×10 <sup>1</sup>  | 2.2×10 <sup>2</sup>  | 1.3×10 <sup>2</sup>  | 3.1×10 <sup>1</sup>  | 6.7×10 <sup>1</sup>  | 4.6×10 <sup>1</sup>  | 8.9×10 <sup>0</sup>  | 3.7×10 <sup>1</sup>  |
|                  |                          | prebaked-control     | 5.1×10 <sup>-2</sup> | 2.9×10 <sup>-2</sup> | 1.8×10 <sup>-2</sup> | 1.6×10 <sup>0</sup>  | 7.9×10 <sup>1</sup>  | 1.6×10 <sup>-1</sup> | 2.2×10 <sup>1</sup>  | 5.3×10 <sup>0</sup>  | 5.5×10 <sup>-1</sup> | 9.7×10 <sup>0</sup>  | 1.2×10 <sup>1</sup>  | 2.0×10 <sup>0</sup>  | 2.6×10 <sup>0</sup>  | 7.8×10 <sup>0</sup>  | 9.0×10 <sup>-1</sup> | 1.5×10 <sup>1</sup>  |
|                  |                          | soderberg-uncontrol  | 5.5×10 <sup>-2</sup> | 2.9×10 <sup>-3</sup> | 3.9×10 <sup>-2</sup> | 6.4×10 <sup>-2</sup> | 4.6×10 <sup>0</sup>  | 5.1×10 <sup>-1</sup> | 1.2×10 <sup>1</sup>  | 9.5×10 <sup>0</sup>  | 2.5×10 <sup>0</sup>  | 6.4×10 <sup>0</sup>  | 2.9×10 <sup>0</sup>  | 8.9×10 <sup>-1</sup> | 7.6×10 <sup>-1</sup> | 6.3×10 <sup>-1</sup> | 2.6×10 <sup>-1</sup> | 6.3×10 <sup>-1</sup> |
|                  |                          | soderberg-control    | 7.0×10 <sup>-3</sup> | 5.5×10 <sup>-3</sup> | 3.0×10 <sup>-3</sup> | 2.7×10 <sup>-1</sup> | 7.5×10 <sup>0</sup>  | 1.5×10 <sup>-2</sup> | 1.9×10 <sup>0</sup>  | 3.4×10 <sup>-1</sup> | 2.9×10 <sup>-2</sup> | 2.8×10 <sup>-1</sup> | 2.7×10 <sup>-1</sup> | 5.6×10 <sup>-2</sup> | 2.9×10 <sup>-2</sup> | 1.1×10 <sup>-1</sup> | 2.7×10 <sup>-2</sup> | 2.6×10 <sup>-1</sup> |
| 18               | g/TJ gas burned          |                      | 2.9×10 <sup>-2</sup> | 2.3×10 <sup>-3</sup> | 2.9×10 <sup>-2</sup> | 1.1×10 <sup>-3</sup> | 2.2×10 <sup>-3</sup> | 1.6×10 <sup>-4</sup> | 7.4×10 <sup>-4</sup> | 7.8×10 <sup>-4</sup> | 1.7×10 <sup>-3</sup> | 1.8×10 <sup>-3</sup> | 2.2×10 <sup>-3</sup> | 2.0×10 <sup>-3</sup> | 1.3×10 <sup>-3</sup> | 1.1×10 <sup>-3</sup> | 7.5×10 <sup>-4</sup> | 2.4×10 <sup>-3</sup> |
| 19               | mg/t pig iron produced   | uncontrol            | 2.4×10 <sup>3</sup>  | 9.5×10 <sup>2</sup>  | 6.8×10 <sup>1</sup>  | 1.4×10 <sup>2</sup>  | 1.7×10 <sup>2</sup>  | 2.1×10 <sup>1</sup>  | 2.6×10 <sup>1</sup>  | 2.3×10 <sup>1</sup>  | 1.3×10 <sup>1</sup>  | 1.5×10 <sup>1</sup>  | 2.2×10 <sup>1</sup>  | 1.3×10 <sup>1</sup>  | 1.6×10 <sup>1</sup>  | 4.2×10 <sup>1</sup>  | 2.0×10 <sup>1</sup>  | 4.2×10 <sup>1</sup>  |
|                  |                          | control              | 3.3×10 <sup>2</sup>  | 1.8×10 <sup>2</sup>  | 1.1×10 <sup>1</sup>  | 2.3×10 <sup>1</sup>  | 1.6×10 <sup>1</sup>  | 1.9×10 <sup>0</sup>  | 2.3×10 <sup>0</sup>  | 1.5×10 <sup>0</sup>  | 6.6×10 <sup>-1</sup> | 4.4×10 <sup>-1</sup> | 4.9×10 <sup>-1</sup> | 3.8×10 <sup>-1</sup> | 1.8×10 <sup>-1</sup> | 5.7×10 <sup>-1</sup> | 5.9×10 <sup>-1</sup> | 7.1×10 <sup>-1</sup> |
| 20               | mg/t crude produced      | steeluncontrol       | 6.9×10 <sup>3</sup>  | 1.2×10 <sup>2</sup>  | 6.1×10 <sup>1</sup>  | 5.9×10 <sup>1</sup>  | 3.4×10 <sup>1</sup>  | 4.3×10 <sup>2</sup>  | 2.5×10 <sup>2</sup>  | 2.7×10 <sup>2</sup>  | 2.4×10 <sup>1</sup>  | 3.0×10 <sup>1</sup>  | 1.5×10 <sup>2</sup>  | 1.2×10 <sup>1</sup>  | 3.2×10 <sup>1</sup>  | 7.5×10 <sup>1</sup>  | 8.4×10 <sup>0</sup>  | 9.4×10 <sup>1</sup>  |
|                  |                          | control              | 9.5×10 <sup>2</sup>  | 2.3×10 <sup>1</sup>  | 9.9×10 <sup>0</sup>  | 9.9×10 <sup>0</sup>  | 3.2×10 <sup>0</sup>  | 3.9×10 <sup>1</sup>  | 2.2×10 <sup>1</sup>  | 1.7×10 <sup>1</sup>  | 1.3×10 <sup>0</sup>  | 8.7×10 <sup>-1</sup> | 3.3×10 <sup>0</sup>  | 3.5×10 <sup>-1</sup> | 3.6×10 <sup>-1</sup> | 1.0×10 <sup>0</sup>  | 2.5×10 <sup>-1</sup> | 1.6×10 <sup>0</sup>  |
| 21               | mg/t crude produced      | steeluncontrol       | 5.4×10 <sup>2</sup>  | 1.3×10 <sup>1</sup>  | 6.2×10 <sup>0</sup>  | 6.1×10 <sup>0</sup>  | 1.2×10 <sup>0</sup>  | 2.2×10 <sup>1</sup>  | 3.5×10 <sup>0</sup>  | 2.8×10 <sup>0</sup>  | 4.3×10 <sup>-1</sup> | 5.2×10 <sup>-1</sup> | 5.1×10 <sup>-1</sup> | 5.3×10 <sup>-2</sup> | 2.4×10 <sup>-1</sup> | 2.5×10 <sup>-1</sup> | 1.0×10 <sup>-1</sup> | 1.4×10 <sup>-1</sup> |
|                  |                          | control              | 7.4×10 <sup>1</sup>  | 2.4×10 <sup>0</sup>  | 1.0×10 <sup>0</sup>  | 1.0×10 <sup>0</sup>  | 1.2×10 <sup>-1</sup> | 2.0×10 <sup>0</sup>  | 3.1×10 <sup>-1</sup> | 1.8×10 <sup>-1</sup> | 2.3×10 <sup>-2</sup> | 1.5×10 <sup>-2</sup> | 1.1×10 <sup>-2</sup> | 1.5×10 <sup>-3</sup> | 2.7×10 <sup>-3</sup> | 3.4×10 <sup>-3</sup> | 3.0×10 <sup>-3</sup> | 2.3×10 <sup>-3</sup> |
| 22               | mg/t crude produced      | steeluncontrol       | 2.6×10 <sup>3</sup>  | 7.5×10 <sup>1</sup>  | 3.7×10 <sup>1</sup>  | 4.5×10 <sup>1</sup>  | 1.4×10 <sup>1</sup>  | 2.8×10 <sup>2</sup>  | 1.1×10 <sup>2</sup>  | 8.7×10 <sup>1</sup>  | 6.4×10 <sup>1</sup>  | 3.0×10 <sup>1</sup>  | 7.8×10 <sup>1</sup>  | 1.0×10 <sup>1</sup>  | 1.4×10 <sup>1</sup>  | 2.3×10 <sup>1</sup>  | 4.1×10 <sup>0</sup>  | 6.2×10 <sup>1</sup>  |
|                  |                          | control              | 3.6×10 <sup>2</sup>  | 1.4×10 <sup>1</sup>  | 6.1×10 <sup>0</sup>  | 7.5×10 <sup>0</sup>  | 1.3×10 <sup>0</sup>  | 2.5×10 <sup>1</sup>  | 9.9×10 <sup>0</sup>  | 5.6×10 <sup>0</sup>  | 3.3×10 <sup>0</sup>  | 8.6×10 <sup>-1</sup> | 1.7×10 <sup>0</sup>  | 3.0×10 <sup>-1</sup> | 1.6×10 <sup>-1</sup> | 3.2×10 <sup>-1</sup> | 1.2×10 <sup>-1</sup> | 1.1×10 <sup>0</sup>  |
| 23               | mg/t hot rolled produced | steeluncontrol       | 9.6×10 <sup>1</sup>  | 3.7×10 <sup>1</sup>  | 2.7×10 <sup>0</sup>  | 5.5×10 <sup>0</sup>  | 6.8×10 <sup>0</sup>  | 8.1×10 <sup>-1</sup> | 1.0×10 <sup>0</sup>  | 9.0×10 <sup>-1</sup> | 5.0×10 <sup>-1</sup> | 6.0×10 <sup>-1</sup> | 8.8×10 <sup>-1</sup> | 5.2×10 <sup>-1</sup> | 6.1×10 <sup>-1</sup> | 1.6×10 <sup>0</sup>  | 7.8×10 <sup>-1</sup> | 1.6×10 <sup>0</sup>  |
|                  |                          | control              | 1.3×10 <sup>1</sup>  | 7.1×10 <sup>0</sup>  | 4.4×10 <sup>-1</sup> | 9.1×10 <sup>-1</sup> | 6.4×10 <sup>-1</sup> | 7.4×10 <sup>-2</sup> | 9.1×10 <sup>-2</sup> | 5.8×10 <sup>-2</sup> | 2.6×10 <sup>-2</sup> | 1.7×10 <sup>-2</sup> | 1.9×10 <sup>-2</sup> | 1.5×10 <sup>-2</sup> | 7.0×10 <sup>-3</sup> | 2.2×10 <sup>-2</sup> | 3.3×10 <sup>-2</sup> | 2.8×10 <sup>-2</sup> |
| 24,30,36         | mg/t fuel consumed       |                      | 5.1×10 <sup>2</sup>  | 4.5×10 <sup>0</sup>  | 4.8×10 <sup>0</sup>  | 2.7×10 <sup>0</sup>  | 8.6×10 <sup>0</sup>  | 1.8×10 <sup>0</sup>  | 6.8×10 <sup>0</sup>  | 4.3×10 <sup>0</sup>  | 9.6×10 <sup>0</sup>  | 9.0×10 <sup>-1</sup> | 2.0×10 <sup>0</sup>  | 4.1×10 <sup>0</sup>  | 2.8×10 <sup>0</sup>  | 1.9×10 <sup>0</sup>  | 4.6×10 <sup>0</sup>  | 2.4×10 <sup>0</sup>  |
| 25~29            | mg/t fuel consumed       | uncontrol            | 5.2×10 <sup>3</sup>  | 4.0×10 <sup>1</sup>  | 9.7×10 <sup>1</sup>  | 2.0×10 <sup>1</sup>  | 3.2×10 <sup>3</sup>  | 2.4×10 <sup>1</sup>  | 8.1×10 <sup>2</sup>  | 1.2×10 <sup>2</sup>  | 7.7×10 <sup>0</sup>  | 3.1×10 <sup>1</sup>  | 2.0×10 <sup>1</sup>  | 6.3×10 <sup>0</sup>  | 4.0×10 <sup>1</sup>  | 1.0×10 <sup>1</sup>  | 3.7×10 <sup>0</sup>  | 1.1×10 <sup>1</sup>  |
|                  |                          | control              | 7.2×10 <sup>2</sup>  | 7.6×10 <sup>0</sup>  | 1.6×10 <sup>1</sup>  | 3.3×10 <sup>0</sup>  | 3.0×10 <sup>2</sup>  | 2.2×10 <sup>0</sup>  | 7.1×10 <sup>1</sup>  | 7.6×10 <sup>0</sup>  | 4.0×10 <sup>-1</sup> | 9.0×10 <sup>-1</sup> | 4.3×10 <sup>-1</sup> | 1.8×10 <sup>-1</sup> | 4.6×10 <sup>-1</sup> | 1.4×10 <sup>-1</sup> | 1.1×10 <sup>-1</sup> | 1.9×10 <sup>-1</sup> |
| 31               | mg/t fuel consumed       | uncontrol            | 2.0×10 <sup>3</sup>  | 2.5×10 <sup>1</sup>  | 1.2×10 <sup>0</sup>  | 9.8×10 <sup>-1</sup> | 2.3×10 <sup>1</sup>  | 1.1×10 <sup>0</sup>  | 7.2×10 <sup>0</sup>  | 8.5×10 <sup>0</sup>  | 5.3×10 <sup>-1</sup> | 9.0×10 <sup>-1</sup> | 7.5×10 <sup>0</sup>  | 2.9×10 <sup>0</sup>  | 7.3×10 <sup>-2</sup> | 1.7×10 <sup>-1</sup> | 0.0×10 <sup>0</sup>  | 5.2×10 <sup>-1</sup> |
|                  |                          | control              | 2.8×10 <sup>2</sup>  | 4.8×10 <sup>0</sup>  | 2.0×10 <sup>-1</sup> | 1.6×10 <sup>-1</sup> | 2.1×10 <sup>0</sup>  | 9.6×10 <sup>-2</sup> | 6.3×10 <sup>-1</sup> | 5.5×10 <sup>-1</sup> | 2.8×10 <sup>-2</sup> | 2.6×10 <sup>-2</sup> | 1.7×10 <sup>-1</sup> | 8.3×10 <sup>-2</sup> | 8.3×10 <sup>-4</sup> | 2.3×10 <sup>-3</sup> | 0.0×10 <sup>0</sup>  | 8.9×10 <sup>-3</sup> |
| 32               | g/TJ fuel consumed       |                      | 2.9×10 <sup>-3</sup> | 2.3×10 <sup>-4</sup> | 2.9×10 <sup>-3</sup> | 1.1×10 <sup>-4</sup> | 2.2×10 <sup>-4</sup> | 1.6×10 <sup>-5</sup> | 7.4×10 <sup>-5</sup> | 7.8×10 <sup>-5</sup> | 1.7×10 <sup>-4</sup> | 1.8×10 <sup>-4</sup> | 2.2×10 <sup>-4</sup> | 2.0×10 <sup>-4</sup> | 1.3×10 <sup>-4</sup> | 1.1×10 <sup>-4</sup> | 7.5×10 <sup>-5</sup> | 2.4×10 <sup>-4</sup> |
| 33,34            | g/TJ fuel consumed       | uncontrol            | 1.9×10 <sup>3</sup>  | 2.4×10 <sup>2</sup>  | 1.7×10 <sup>1</sup>  | 2.4×10 <sup>1</sup>  | 1.4×10 <sup>2</sup>  | 1.0×10 <sup>1</sup>  | 4.8×10 <sup>1</sup>  | 6.8×10 <sup>1</sup>  | 2.1×10 <sup>1</sup>  | 1.9×10 <sup>1</sup>  | 1.1×10 <sup>1</sup>  | 2.4×10               |                      |                      |                      |                      |

| No. <sup>a</sup>     | units                 | sub-source               | NAP                  | ACY                  | ACE                  | FLO                  | PHE                  | ANT                  | FLA                  | PYR                  | BaA                  | CHR                  | BbF                  | BkF                  | BaP                  | IcdP                 | DahA                 | BghiP                |
|----------------------|-----------------------|--------------------------|----------------------|----------------------|----------------------|----------------------|----------------------|----------------------|----------------------|----------------------|----------------------|----------------------|----------------------|----------------------|----------------------|----------------------|----------------------|----------------------|
| 38                   | g/t fuel consumed     |                          | 1.3×10 <sup>-1</sup> | 2.9×10 <sup>-2</sup> | 1.1×10 <sup>-2</sup> | 1.0×10 <sup>-2</sup> | 1.0×10 <sup>-1</sup> | 6.1×10 <sup>-3</sup> | 3.0×10 <sup>-2</sup> | 2.2×10 <sup>-2</sup> | 5.4×10 <sup>-3</sup> | 1.3×10 <sup>-2</sup> | 2.5×10 <sup>-3</sup> | 1.4×10 <sup>-2</sup> | 9.8×10 <sup>-4</sup> | 8.9×10 <sup>-4</sup> | 6.3×10 <sup>-4</sup> | 1.8×10 <sup>-3</sup> |
| 39~42                | g/t fuel consumed     |                          | 1.6×10 <sup>1</sup>  | 6.1×10 <sup>0</sup>  | 1.1×10 <sup>1</sup>  | 4.3×10 <sup>0</sup>  | 1.1×10 <sup>1</sup>  | 1.9×10 <sup>0</sup>  | 4.2×10 <sup>0</sup>  | 2.5×10 <sup>0</sup>  | 1.9×10 <sup>0</sup>  | 3.7×10 <sup>0</sup>  | 1.6×10 <sup>0</sup>  | 1.6×10 <sup>0</sup>  | 1.1×10 <sup>0</sup>  | 9.5×10 <sup>-1</sup> | 1.9×10 <sup>0</sup>  | 2.1×10 <sup>0</sup>  |
| 43                   | g/t fuel consumed     |                          | 5.3×10 <sup>-2</sup> | 1.3×10 <sup>-2</sup> | 3.7×10 <sup>-2</sup> | 7.7×10 <sup>-3</sup> | 3.6×10 <sup>-3</sup> | 1.6×10 <sup>-3</sup> | 3.4×10 <sup>-2</sup> | 1.5×10 <sup>-2</sup> | 3.8×10 <sup>-3</sup> | 3.6×10 <sup>-3</sup> | 2.4×10 <sup>-3</sup> | 2.1×10 <sup>-2</sup> | 2.7×10 <sup>-3</sup> | 5.5×10 <sup>-3</sup> | 8.6×10 <sup>-2</sup> | 7.1×10 <sup>-3</sup> |
| 44                   | g/TJ fuel consumed    |                          | 7.0×10 <sup>-1</sup> | 6.0×10 <sup>-2</sup> | 6.7×10 <sup>-2</sup> | 5.0×10 <sup>-2</sup> | 6.2×10 <sup>-2</sup> | 4.3×10 <sup>-3</sup> | 2.1×10 <sup>-2</sup> | 3.0×10 <sup>-2</sup> | 4.0×10 <sup>-2</sup> | 1.7×10 <sup>-2</sup> | 4.2×10 <sup>-2</sup> | 4.2×10 <sup>-2</sup> | 2.9×10 <sup>-2</sup> | 2.2×10 <sup>-2</sup> | 1.5×10 <sup>-2</sup> | 4.6×10 <sup>-2</sup> |
| 45,46                | g/t fuel consumed     |                          | 5.3×10 <sup>-2</sup> | 1.3×10 <sup>-2</sup> | 3.7×10 <sup>-2</sup> | 7.7×10 <sup>-3</sup> | 3.6×10 <sup>-3</sup> | 1.6×10 <sup>-3</sup> | 3.4×10 <sup>-2</sup> | 1.5×10 <sup>-2</sup> | 3.8×10 <sup>-3</sup> | 3.6×10 <sup>-3</sup> | 2.4×10 <sup>-3</sup> | 2.1×10 <sup>-2</sup> | 2.7×10 <sup>-3</sup> | 5.5×10 <sup>-3</sup> | 8.6×10 <sup>-2</sup> | 7.1×10 <sup>-3</sup> |
| 47                   | g/TJ fuel consumed    |                          | 7.0×10 <sup>-2</sup> | 6.0×10 <sup>-3</sup> | 6.7×10 <sup>-2</sup> | 5.0×10 <sup>-3</sup> | 6.2×10 <sup>-3</sup> | 4.3×10 <sup>-4</sup> | 2.1×10 <sup>-3</sup> | 3.0×10 <sup>-3</sup> | 4.0×10 <sup>-3</sup> | 1.7×10 <sup>-3</sup> | 4.2×10 <sup>-3</sup> | 4.2×10 <sup>-3</sup> | 2.9×10 <sup>-3</sup> | 2.2×10 <sup>-3</sup> | 1.5×10 <sup>-3</sup> | 4.6×10 <sup>-3</sup> |
| 48                   | g/t fuel consumed     | traditional woodstove    | 1.2×10 <sup>2</sup>  | 9.4×10 <sup>1</sup>  | 2.5×10 <sup>1</sup>  | 1.0×10 <sup>1</sup>  | 3.0×10 <sup>1</sup>  | 5.3×10 <sup>0</sup>  | 7.5×10 <sup>0</sup>  | 8.8×10 <sup>0</sup>  | 6.3×10 <sup>0</sup>  | 2.6×10 <sup>0</sup>  | 1.6×10 <sup>0</sup>  | 7.0×10 <sup>-1</sup> | 1.5×10 <sup>0</sup>  | 8.7×10 <sup>-1</sup> | 5.7×10 <sup>-1</sup> | 1.1×10 <sup>0</sup>  |
|                      |                       | improved woodstove       | 1.5×10 <sup>1</sup>  | 1.0×10 <sup>1</sup>  | 5.6×10 <sup>0</sup>  | 7.6×10 <sup>-1</sup> | 7.9×10 <sup>0</sup>  | 2.8×10 <sup>0</sup>  | 6.0×10 <sup>0</sup>  | 2.2×10 <sup>0</sup>  | 6.4×10 <sup>-1</sup> | 7.4×10 <sup>-1</sup> | 4.6×10 <sup>-1</sup> | 5.9×10 <sup>-1</sup> | 5.6×10 <sup>-1</sup> | 2.5×10 <sup>-1</sup> | 2.6×10 <sup>-1</sup> | 1.8×10 <sup>-1</sup> |
|                      |                       | fireplace                | 1.6×10 <sup>1</sup>  | 1.1×10 <sup>1</sup>  | 3.9×10 <sup>0</sup>  | 1.6×10 <sup>0</sup>  | 6.8×10 <sup>0</sup>  | 2.0×10 <sup>0</sup>  | 3.2×10 <sup>0</sup>  | 2.0×10 <sup>0</sup>  | 6.5×10 <sup>-1</sup> | 8.6×10 <sup>-1</sup> | 4.2×10 <sup>-1</sup> | 5.0×10 <sup>-1</sup> | 5.5×10 <sup>-1</sup> | 1.0×10 <sup>-1</sup> | 2.0×10 <sup>-1</sup> | 3.6×10 <sup>-1</sup> |
| 49                   | g/t fuel consumed     | barley-traditional stove | 1.1×10 <sup>2</sup>  | 2.4×10 <sup>1</sup>  | 2.1×10 <sup>1</sup>  | 3.3×10 <sup>1</sup>  | 6.1×10 <sup>1</sup>  | 8.9×10 <sup>0</sup>  | 2.5×10 <sup>1</sup>  | 2.1×10 <sup>1</sup>  | 4.4×10 <sup>0</sup>  | 4.8×10 <sup>0</sup>  | 4.2×10 <sup>0</sup>  | 3.3×10 <sup>0</sup>  | 4.0×10 <sup>0</sup>  | 3.0×10 <sup>0</sup>  | 7.5×10 <sup>-1</sup> | 2.6×10 <sup>0</sup>  |
|                      |                       | maize-traditional stove  | 1.5×10 <sup>1</sup>  | 2.6×10 <sup>0</sup>  | 2.4×10 <sup>0</sup>  | 3.4×10 <sup>0</sup>  | 6.9×10 <sup>0</sup>  | 1.1×10 <sup>0</sup>  | 2.7×10 <sup>0</sup>  | 2.3×10 <sup>0</sup>  | 4.8×10 <sup>-1</sup> | 5.4×10 <sup>-1</sup> | 4.7×10 <sup>-1</sup> | 3.7×10 <sup>-1</sup> | 4.0×10 <sup>-1</sup> | 3.0×10 <sup>-1</sup> | 8.7×10 <sup>-2</sup> | 2.7×10 <sup>-1</sup> |
|                      |                       | rice-traditional stove   | 4.1×10 <sup>1</sup>  | 5.5×10 <sup>0</sup>  | 5.9×10 <sup>0</sup>  | 6.3×10 <sup>0</sup>  | 1.0×10 <sup>1</sup>  | 1.7×10 <sup>0</sup>  | 7.6×10 <sup>0</sup>  | 7.3×10 <sup>0</sup>  | 1.3×10 <sup>0</sup>  | 1.2×10 <sup>0</sup>  | 1.1×10 <sup>0</sup>  | 1.0×10 <sup>0</sup>  | 1.5×10 <sup>0</sup>  | 9.5×10 <sup>-1</sup> | 1.6×10 <sup>-1</sup> | 7.1×10 <sup>-1</sup> |
|                      |                       | wheat-traditional stove  | 3.7×10 <sup>1</sup>  | 8.3×10 <sup>0</sup>  | 7.1×10 <sup>0</sup>  | 1.1×10 <sup>1</sup>  | 2.1×10 <sup>1</sup>  | 3.1×10 <sup>0</sup>  | 8.6×10 <sup>0</sup>  | 7.3×10 <sup>0</sup>  | 1.5×10 <sup>0</sup>  | 1.7×10 <sup>0</sup>  | 1.4×10 <sup>0</sup>  | 1.2×10 <sup>0</sup>  | 1.4×10 <sup>0</sup>  | 1.0×10 <sup>0</sup>  | 2.6×10 <sup>-1</sup> | 8.9×10 <sup>-1</sup> |
|                      |                       | barley-improved stove    | 1.3×10 <sup>1</sup>  | 2.6×10 <sup>0</sup>  | 4.7×10 <sup>0</sup>  | 2.4×10 <sup>0</sup>  | 1.6×10 <sup>1</sup>  | 4.6×10 <sup>0</sup>  | 2.0×10 <sup>1</sup>  | 5.2×10 <sup>0</sup>  | 4.5×10 <sup>-1</sup> | 1.4×10 <sup>0</sup>  | 1.2×10 <sup>0</sup>  | 2.8×10 <sup>0</sup>  | 1.5×10 <sup>0</sup>  | 8.5×10 <sup>-1</sup> | 3.4×10 <sup>-1</sup> | 4.3×10 <sup>-1</sup> |
|                      |                       | maize-improved stove     | 1.9×10 <sup>0</sup>  | 2.9×10 <sup>-1</sup> | 5.4×10 <sup>-1</sup> | 2.5×10 <sup>-1</sup> | 1.8×10 <sup>0</sup>  | 5.8×10 <sup>-1</sup> | 2.1×10 <sup>0</sup>  | 5.5×10 <sup>-1</sup> | 4.8×10 <sup>-2</sup> | 1.5×10 <sup>-1</sup> | 1.3×10 <sup>-1</sup> | 3.1×10 <sup>-1</sup> | 1.5×10 <sup>-1</sup> | 8.7×10 <sup>-2</sup> | 4.0×10 <sup>-2</sup> | 4.5×10 <sup>-2</sup> |
|                      |                       | rice-improved stove      | 5.0×10 <sup>0</sup>  | 6.0×10 <sup>-1</sup> | 1.3×10 <sup>0</sup>  | 4.7×10 <sup>-1</sup> | 2.7×10 <sup>0</sup>  | 9.1×10 <sup>-1</sup> | 6.0×10 <sup>0</sup>  | 1.8×10 <sup>0</sup>  | 1.3×10 <sup>-1</sup> | 3.5×10 <sup>-1</sup> | 3.1×10 <sup>-1</sup> | 8.4×10 <sup>-1</sup> | 5.8×10 <sup>-1</sup> | 2.7×10 <sup>-1</sup> | 7.2×10 <sup>-2</sup> | 1.2×10 <sup>-1</sup> |
| wheat-improved stove | 4.6×10 <sup>0</sup>   | 9.1×10 <sup>-1</sup>     | 1.6×10 <sup>0</sup>  | 8.3×10 <sup>-1</sup> | 5.6×10 <sup>0</sup>  | 1.6×10 <sup>0</sup>  | 6.9×10 <sup>0</sup>  | 1.8×10 <sup>0</sup>  | 1.5×10 <sup>-1</sup> | 4.7×10 <sup>-1</sup> | 4.1×10 <sup>-1</sup> | 9.7×10 <sup>-1</sup> | 5.3×10 <sup>-1</sup> | 2.9×10 <sup>-1</sup> | 1.2×10 <sup>-1</sup> | 1.5×10 <sup>-1</sup> |                      |                      |
| 50                   | g/t fuel consumed     | traditional woodstove    | 7.9×10 <sup>1</sup>  | 4.1×10 <sup>1</sup>  | 1.5×10 <sup>1</sup>  | 6.3×10 <sup>0</sup>  | 2.5×10 <sup>1</sup>  | 6.1×10 <sup>0</sup>  | 1.2×10 <sup>1</sup>  | 9.4×10 <sup>0</sup>  | 3.1×10 <sup>0</sup>  | 1.9×10 <sup>0</sup>  | 7.7×10 <sup>-1</sup> | 7.0×10 <sup>-1</sup> | 1.1×10 <sup>0</sup>  | 1.9×10 <sup>-1</sup> | 4.9×10 <sup>-1</sup> | 3.9×10 <sup>-1</sup> |
|                      |                       | improved woodstove       | 1.9×10 <sup>2</sup>  | 5.0×10 <sup>0</sup>  | 9.6×10 <sup>0</sup>  | 5.3×10 <sup>0</sup>  | 5.7×10 <sup>1</sup>  | 2.8×10 <sup>0</sup>  | 5.2×10 <sup>1</sup>  | 1.3×10 <sup>1</sup>  | 2.1×10 <sup>-1</sup> | 5.7×10 <sup>-1</sup> | 4.4×10 <sup>-1</sup> | 9.8×10 <sup>-1</sup> | 8.1×10 <sup>-1</sup> | 2.8×10 <sup>-1</sup> | 1.9×10 <sup>-2</sup> | 1.1×10 <sup>-1</sup> |
| 63                   | g/t dry matter burned | barley                   | 1.5×10 <sup>2</sup>  | 1.8×10 <sup>1</sup>  | 2.2×10 <sup>1</sup>  | 2.1×10 <sup>0</sup>  | 1.7×10 <sup>1</sup>  | 2.4×10 <sup>0</sup>  | 2.4×10 <sup>0</sup>  | 2.4×10 <sup>0</sup>  | 1.1×10 <sup>0</sup>  | 1.5×10 <sup>0</sup>  | 2.5×10 <sup>0</sup>  | 6.1×10 <sup>-1</sup> | 8.0×10 <sup>-1</sup> | 1.0×10 <sup>-2</sup> | 5.9×10 <sup>-1</sup> | 5.2×10 <sup>-1</sup> |
|                      |                       | maize                    | 1.5×10 <sup>0</sup>  | 6.3×10 <sup>-1</sup> | 5.0×10 <sup>-1</sup> | 6.4×10 <sup>-2</sup> | 1.8×10 <sup>0</sup>  | 2.7×10 <sup>-1</sup> | 7.6×10 <sup>-1</sup> | 7.9×10 <sup>-1</sup> | 7.7×10 <sup>-2</sup> | 1.5×10 <sup>-1</sup> | 2.9×10 <sup>-2</sup> | 1.8×10 <sup>-1</sup> | 2.4×10 <sup>-2</sup> | 0.0×10 <sup>0</sup>  | 0.0×10 <sup>0</sup>  | 0.0×10 <sup>0</sup>  |
|                      |                       | rice                     | 7.7×10 <sup>0</sup>  | 5.2×10 <sup>-2</sup> | 6.1×10 <sup>-1</sup> | 2.9×10 <sup>-1</sup> | 1.4×10 <sup>0</sup>  | 2.4×10 <sup>-1</sup> | 4.4×10 <sup>-1</sup> | 3.4×10 <sup>-1</sup> | 8.2×10 <sup>-2</sup> | 9.8×10 <sup>-2</sup> | 1.3×10 <sup>-1</sup> | 3.0×10 <sup>-2</sup> | 4.1×10 <sup>-2</sup> | 0.0×10 <sup>0</sup>  | 3.2×10 <sup>-2</sup> | 4.3×10 <sup>-2</sup> |
|                      |                       | wheat                    | 4.4×10 <sup>1</sup>  | 3.3×10 <sup>-1</sup> | 7.0×10 <sup>-1</sup> | 2.5×10 <sup>-1</sup> | 4.8×10 <sup>0</sup>  | 1.2×10 <sup>0</sup>  | 6.7×10 <sup>0</sup>  | 3.3×10 <sup>0</sup>  | 2.3×10 <sup>0</sup>  | 2.3×10 <sup>0</sup>  | 9.9×10 <sup>-1</sup> | 5.3×10 <sup>-1</sup> | 2.8×10 <sup>-1</sup> | 0.0×10 <sup>0</sup>  | 6.7×10 <sup>-1</sup> | 1.0×10 <sup>0</sup>  |
| 65~68                | g/t dry matter burned |                          | 1.1×10 <sup>1</sup>  | 2.2×10 <sup>0</sup>  | 1.8×10 <sup>0</sup>  | 7.5×10 <sup>-1</sup> | 2.3×10 <sup>0</sup>  | 3.7×10 <sup>-1</sup> | 1.6×10 <sup>0</sup>  | 1.1×10 <sup>0</sup>  | 1.6×10 <sup>-1</sup> | 1.6×10 <sup>-1</sup> | 5.3×10 <sup>-2</sup> | 1.4×10 <sup>-1</sup> | 1.0×10 <sup>-1</sup> | 3.2×10 <sup>-1</sup> | 1.9×10 <sup>-1</sup> | 6.9×10 <sup>-2</sup> |
| 69                   | g/t dry matter burned |                          | 1.1×10 <sup>0</sup>  | 2.1×10 <sup>-1</sup> | 1.8×10 <sup>-1</sup> | 7.2×10 <sup>-2</sup> | 2.2×10 <sup>-1</sup> | 3.5×10 <sup>-2</sup> | 1.5×10 <sup>-1</sup> | 1.0×10 <sup>-1</sup> | 1.6×10 <sup>-2</sup> | 1.6×10 <sup>-2</sup> | 5.1×10 <sup>-3</sup> | 1.4×10 <sup>-2</sup> | 1.0×10 <sup>-2</sup> | 3.0×10 <sup>-2</sup> | 1.8×10 <sup>-2</sup> | 6.6×10 <sup>-3</sup> |

**Note:**

*a.* In accord with “No.” column in Table S1.

Table S5b. Geometric standard deviations of  $EF_{PAHs}$  for various sources,  $\log_{10}(EF_{PAHs}$  units).

| No. <sup>a</sup>    | NAP  | ACY  | ACE  | FLO  | PHE  | ANT  | FLA  | PYR  | BaA  | CHR  | BbF  | BkF  | BaP  | IcdP | DahA | BghiP |
|---------------------|------|------|------|------|------|------|------|------|------|------|------|------|------|------|------|-------|
| 1~5,8               | 0.51 | 0.48 | 0.51 | 0.75 | 0.48 | 0.44 | 0.46 | 0.64 | 0.57 | 0.56 | 0.56 | 0.56 | 0.84 | 0.56 | 0.77 | 0.75  |
| 6,7,13,24,30,360,89 | 1.07 | 0.90 | 1.00 | 1.11 | 1.35 | 1.46 | 1.57 | 1.13 | 0.61 | 1.04 | 1.03 | 0.90 | 0.59 | 1.48 | 0.65 |       |
| 9,12,18             | 0.43 | 0.49 | 0.30 | 0.30 | 0.28 | 0.30 | 0.21 | 0.69 | 0.30 | 0.30 | 0.30 | 0.30 | 0.30 | 0.30 | 0.30 | 0.30  |
| 10,11               | 1.26 | 1.35 | 0.87 | 0.98 | 0.92 | 1.24 | 1.17 | 1.33 | 0.69 | 0.64 | 0.91 | 0.70 | 0.85 | 1.06 | 0.84 | 0.85  |
| 14~17, 9~23         | 0.69 | 0.69 | 0.72 | 0.66 | 0.71 | 0.68 | 0.70 | 0.70 | 0.75 | 0.73 | 0.73 | 0.72 | 0.72 | 0.73 | 0.72 | 0.73  |
| 25~29,31            | 0.51 | 0.48 | 0.51 | 0.75 | 0.48 | 0.44 | 0.46 | 0.64 | 0.57 | 0.56 | 0.56 | 0.56 | 0.84 | 0.56 | 0.77 | 0.75  |
| 32,35               | 0.43 | 0.49 | 0.30 | 0.30 | 0.28 | 0.30 | 0.21 | 0.69 | 0.30 | 0.30 | 0.30 | 0.30 | 0.30 | 0.30 | 0.30 | 0.30  |
| 33,34               | 1.26 | 1.35 | 0.87 | 0.98 | 0.92 | 1.24 | 1.17 | 1.33 | 0.69 | 0.64 | 0.91 | 0.70 | 0.85 | 1.06 | 0.84 | 0.85  |
| 37                  | 0.16 | 0.17 | 0.11 | 0.22 | 0.21 | 0.26 | 0.22 | 0.31 | 0.22 | 0.23 | 0.47 | 0.27 | 0.31 | 0.00 | 0.35 | 0.15  |
| 38                  | 0.24 | 0.52 | 0.18 | 0.23 | 0.21 | 0.43 | 0.67 | 0.59 | 1.07 | 0.63 | 0.03 | 0.33 | 0.61 | 0.03 | 0.03 | 0.23  |
| 39~42               | 0.33 | 0.38 | 0.40 | 0.48 | 0.67 | 0.86 | 0.45 | 0.21 | 0.72 | 0.67 | 0.97 | 0.15 | 0.42 | 0.32 | 0.22 | 0.48  |
| 43~47               | 0.43 | 0.49 | 0.30 | 0.30 | 0.28 | 0.30 | 0.21 | 0.69 | 0.30 | 0.30 | 0.30 | 0.30 | 0.30 | 0.30 | 0.30 | 0.30  |
| 48,50               | 0.40 | 0.21 | 0.28 | 0.35 | 0.20 | 0.59 | 0.23 | 0.23 | 0.25 | 0.23 | 0.23 | 0.21 | 0.19 | 0.35 | 0.28 | 0.39  |
| 49                  | 0.08 | 0.44 | 0.14 | 0.35 | 0.21 | 0.30 | 0.18 | 0.19 | 0.18 | 0.19 | 0.12 | 0.18 | 0.18 | 0.19 | 0.10 | 0.15  |
| 63                  | 0.16 | 0.17 | 0.11 | 0.22 | 0.21 | 0.26 | 0.22 | 0.31 | 0.22 | 0.23 | 0.47 | 0.27 | 0.31 | 0.00 | 0.35 | 0.15  |
| 65~69               | 0.27 | 0.46 | 0.46 | 0.61 | 0.22 | 0.36 | 0.36 | 0.31 | 0.50 | 0.50 | 0.57 | 0.62 | 0.77 | 0.34 | 0.89 | 1.03  |

**Note:**

<sup>a</sup>. In accord with “No.” column in Table S1.

## S5. Comparison with Zhang's inventory

Figure S4 compares the PAH emissions from major sources in China, India, Brazil, the United States, and all other countries in 2004 derived from this study (similar to that of 2007) and Zhang's study.<sup>18</sup> It was found that although the total PAH emission calculated in this study was similar to that of Zhang's inventory for 2004, the differences for individual countries and sources are much larger between the two inventories. Comparing with those in Zhang's inventory, the global emissions from indoor firewood burning, on-road motor vehicles, and mechanical coking derived in this study were 56 Gg (31%), 52 Gg (206%), and 8 Gg (238%) higher, and emissions from biomass open burning, indoor dung cake burning, and indoor crop residue burning were 19 Gg (26%), 17 Gg (58%), and 15 Gg (18%) lower, respectively. The improvement in emission estimation by using country/region-specific  $EF_{PAHs}$  was better demonstrated for individual sources as well as individual countries. In this study,  $EF_{PAHs}$  for petroleum consumption by on-road motor vehicles were quantified for individual countries in given years. For example,  $EF_{PAH16}$  for on-road gasoline vehicles were 4.3, 81.0, and 141 mg/kg for the United States, Brazil, and China in 2004, respectively. As a result, the estimated PAH emissions from motor vehicles in these three countries was 1.6, 1.1, and 5.9 Gg, respectively in this study, compared with 6.9, 0.4, and 2.0 Gg in Zhang's inventory, in which a single  $EF_{PAH}$  of 17.1 mg/kg was adopted, indicating extraordinary difference between them. Similarly, by using the technology division method, the  $EF_{PAH}$  of BaP for primary aluminum production using Soderberg process in 2004 were estimated to be 41.2 and 4.8 mg/kg in China and the United States in this study, in contrast to a constant value of 15.1 mg/kg in the previous inventory. Together with prebaked process, the estimated total PAH emissions from aluminum production were updated from 0.7 and 0.6 Gg to 1.5 and 0.1 Gg for China and the United States, respectively. Another example is the emission from residential firewood. By dividing the indoor firewood burning source into three categories of traditional woodstoves, improved woodstoves, and fireplaces with different  $EF_{PAH}$ , the global total PAH emission from this source was renewed from 178 Gg in Zhang's inventory to 234 Gg in our inventory. In addition, by dividing the sources to more specific categories, overall uncertainty of the inventory was reduced (error bars in Figure S4), because variations of  $EF_{PAH}$  for more specific sources were always smaller than those of more general ones.

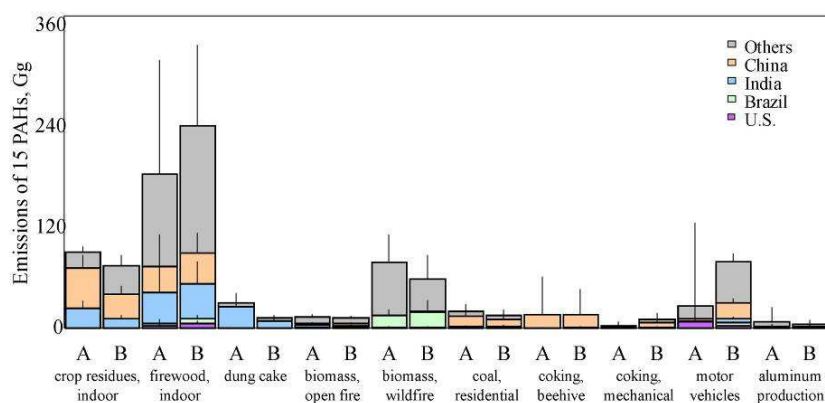

Figure S4. Comparison in total PAH emissions from major sources between 2 global inventories for 2004: A. an inventory reported by Zhang et al.<sup>18</sup> versus B. the inventory developed in this study. The error bars show upper quartiles for each country derived from Monte Carlo simulations.

Figure S5 compares three PAH emission composition profiles, the one from Zhang’s study for 2004<sup>18</sup> and those from this study for the years 2004 and 2007. It appears that the PAH emission composition profiles were quite similar between 2004 and 2007, with a slight decrease in the emissions of most compounds from 2004 to 2007. The composition profile derived in this study for the year 2004 was also similar to that of Zhang’s one for the same year with exceptions of CHR and BkF. The relative contributions of CHR and BkF in Zhang’s study (1.7 and 0.8%) were higher than ours (1.1 and 0.5% respectively). The differences were mainly caused by including more newly reported  $EF_{PAHs}$  for indoor crop residue burning in our study.

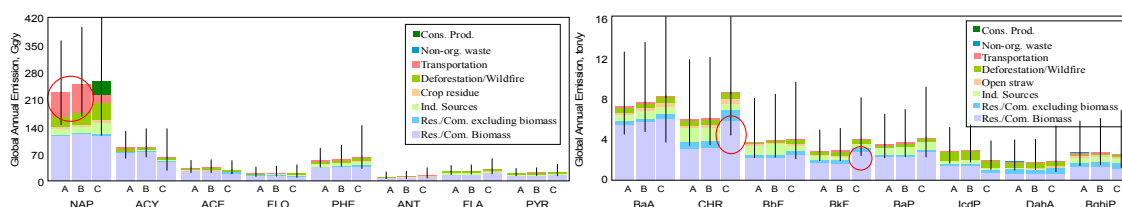

Figure S5. Comparison in composition profiles among the 3 inventories: A) from this study for the year 2007, B) from this study for the year 2004, and C) from Zhang’s study for the year 2004. Relative contributions of 8 important source categories are shown as stacked bars. The error bars present upper quartiles for each compound derived from Monte Carlo simulations. The major differences between our and Zhang’s inventories are marked with red circles.



## S6. Source profiles of BaPeq emissions in 2007.

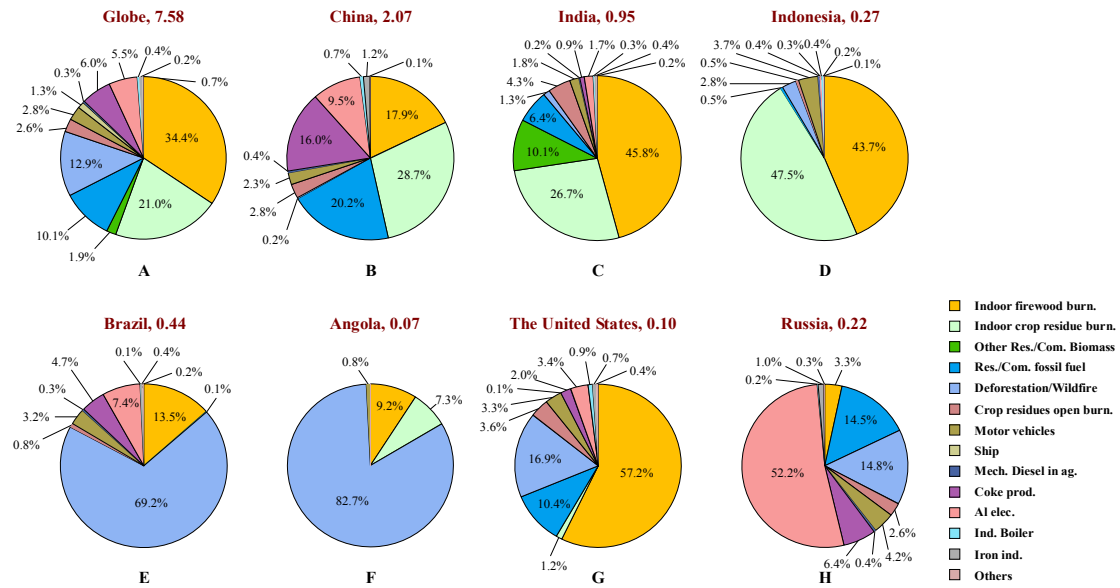

Figure S6. Source profiles of BaPeq emissions in 2007, Gg/year.

### S7. Comparison of global PAH emissions between urban and rural area.

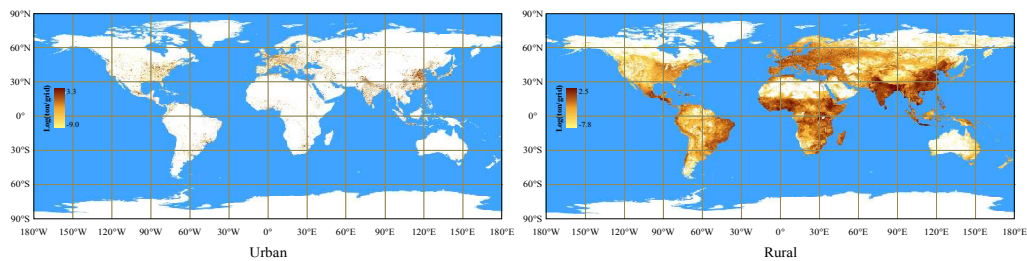

Figure S7. Geographical distributions of anthropogenic PAH16 emissions from urban and rural areas in 2007.

### S8. Relative contributions of individual main source after distance corrected and population weighted.

It is believed that the effect of a certain emission source on exposed population group is strengthened by increasing emission intensity and weakened by distance. Here, we assume that health effect of PAHs as BaP<sub>eq</sub> emitted from a given grid (0.1°×0.1°) was quantified as the effects on the emissions grid and the 24 surrounding grids. The effect on each receiving grid within this area was proportional to the total emissions of the source grid and total population of the receiving grid and inversely proportional to the distance (1 for the source grid itself, 1/4 for the 8 grids immediately adjacent to the source grid, and 1/9 for the other 16 grids) between the emissions and receiving grids. Relative Potential Health Effect (RPHE) of each source category of a source grid was calculated by totalizing the effects of all 25 grids. Figure S8 showed the geographic distribution of the calculated RPHE, and Figure S9 showed the comparison of profiles on PAH16, BaP<sub>eq</sub>, and RPHE basis respectively, together with the ratios of RPHE/BaP<sub>eq</sub>.

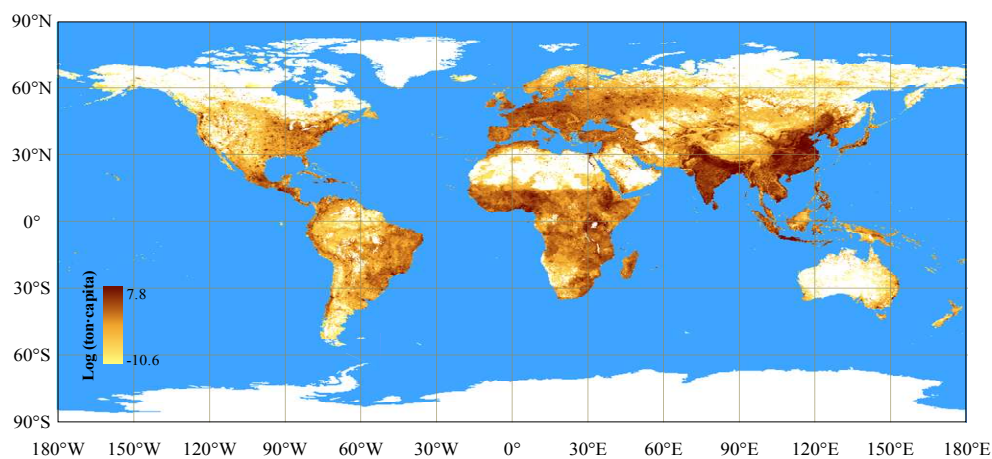

Figure S8. Map of Relative Potential Health Effect (RPHE) from all sources.

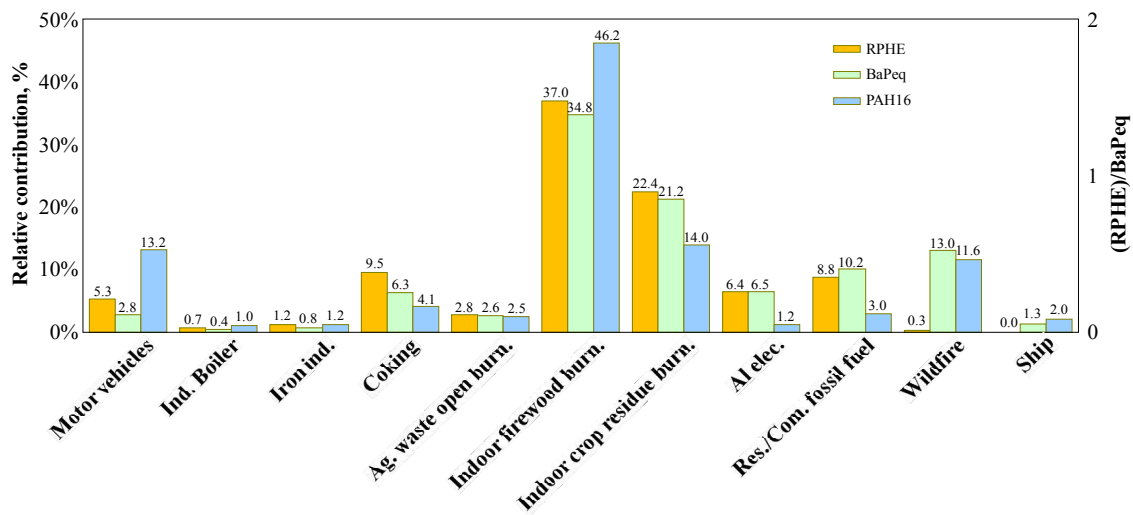

Figure S9. Comparison of relative contributions based on three evaluation methods. PAH16: emission quantity of 16 PAH compounds were simply aggregated. BaPeq: BaP toxic equivalent quality of each PAH compound were aggregated. RPHE: distance-corrected and population-weighted BaPeq was calculated.

### S9. Comparison of PKU-PAH with other studies.

Results of the PKU-PAH emission inventory were compared with other studies, including USEPA<sup>19</sup>, NAEI<sup>20</sup>, and EMEP<sup>21</sup>. Figure S10 showed the comparison in the aspect of emissions from all sources for individual compounds, and Figure S11 showed that in the aspect of emissions from individual sources for group compounds. In general, the majority of the data points shown in Figures below fell around the 1:1 line, indicating no systematic difference between PKU-PAH inventory and those previously developed. Figure S12 showed the comparisons of time trends of country emissions with those reported by EMEP (read the text for detailed discussion).

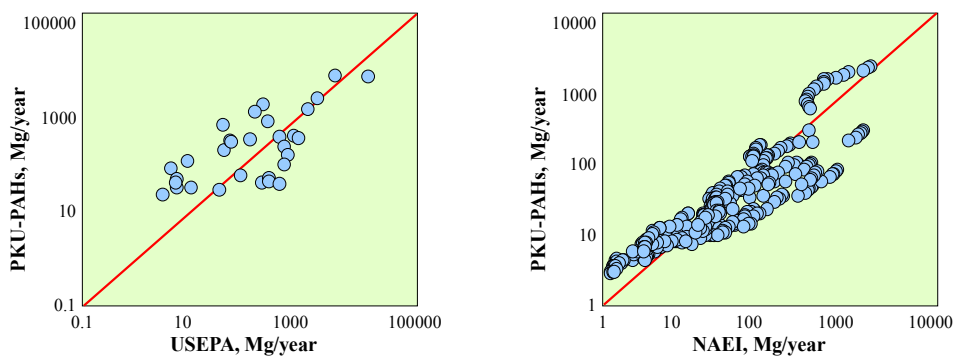

Figure S10. Comparison between the PKU-PAH and the inventories previously published for (A) the United States (16 individual PAHs from all sources from 2002 to 2005), (B) UK (16 individual PAHs from all sources from 1990 to 2009).

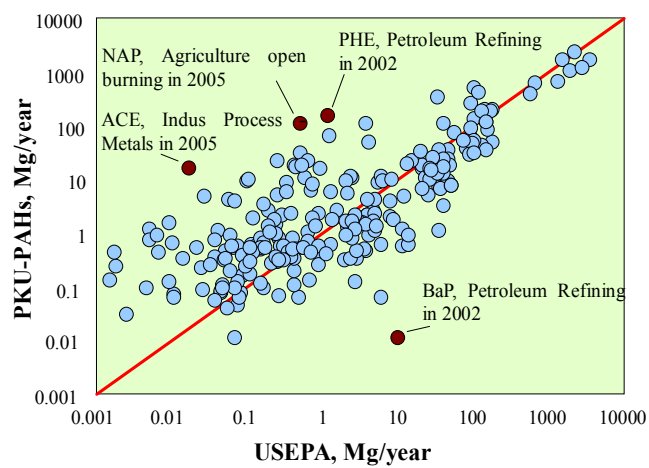

Figure S11. Comparison of annual PAH emissions between PKU-PAH and USEPA reported values. Emissions for each of PAH16 compounds from individual sources in the United States in 2002 and 2005 are plotted in the figure.

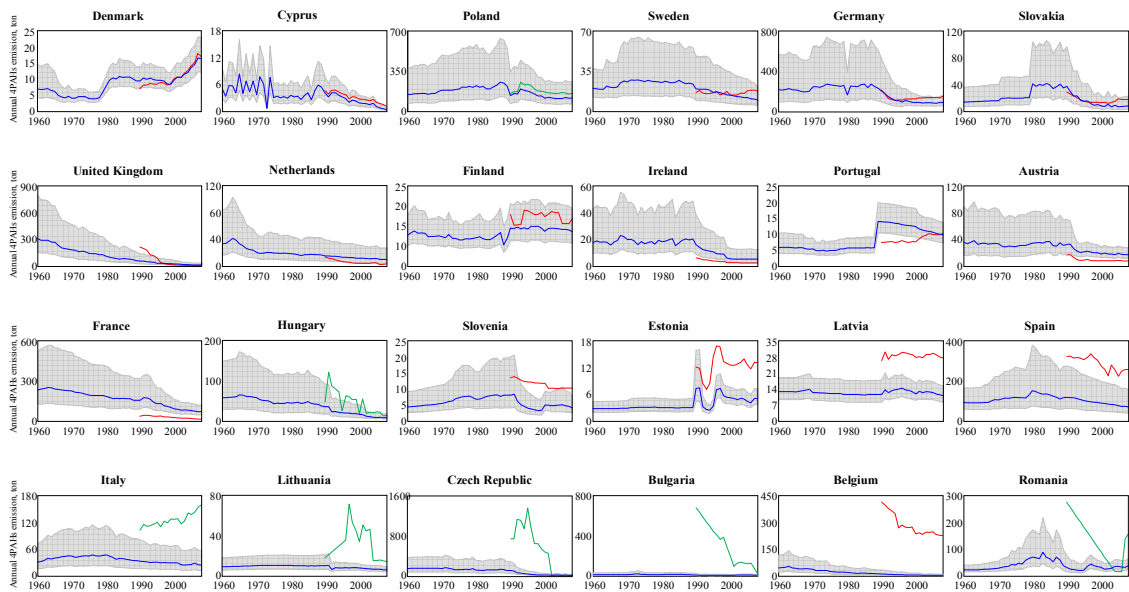

**Figure S12.** Comparison of emission time trends for the total of 4 high molecular weight PAHs (BaP, BbF, BkF, and IcdP) with those reported by EMEP (European Monitoring and Evaluation Programme) for each of 27 European countries from 1990 to 2008. The grey areas are interquartile ranges of PKU-PAH estimation. Red lines and green lines are the emission time trends reported by EMEP. Gap-filled time trends are marked with green.

## S10. World PAH emissions in 2007.

Base on the PKU-PAH emission inventory, emissions of individual PAH compounds in 2007 are listed in [Table S6](#) for each country, and sector specified PAH16 emissions are listed in [Table S7](#) for 9 regions. The results here were source-aggregated and for the base year of 2007 only. For more information, please contact the corresponding author by email.

**Table S6. World emissions of 16 PAHs in 2007 (Mg/year).**

| Country                        | NAP                       | ACY                       | ACE                       | FLO                       | PHE                       | ANT                       | FLA                       | PYR                       | BaA                       | CHR                       | BbF                       | BkF                       | BaP                       | IcdP                      | DahA                      | BghiP                     |
|--------------------------------|---------------------------|---------------------------|---------------------------|---------------------------|---------------------------|---------------------------|---------------------------|---------------------------|---------------------------|---------------------------|---------------------------|---------------------------|---------------------------|---------------------------|---------------------------|---------------------------|
| <b>World</b>                   | <b>2.3×10<sup>5</sup></b> | <b>8.4×10<sup>4</sup></b> | <b>3.2×10<sup>4</sup></b> | <b>1.8×10<sup>4</sup></b> | <b>5.3×10<sup>4</sup></b> | <b>1.0×10<sup>4</sup></b> | <b>2.4×10<sup>4</sup></b> | <b>1.9×10<sup>4</sup></b> | <b>7.2×10<sup>3</sup></b> | <b>5.9×10<sup>3</sup></b> | <b>3.7×10<sup>3</sup></b> | <b>2.9×10<sup>3</sup></b> | <b>3.5×10<sup>3</sup></b> | <b>2.9×10<sup>3</sup></b> | <b>1.8×10<sup>3</sup></b> | <b>2.7×10<sup>3</sup></b> |
| Afghanistan                    | 1.3×10 <sup>2</sup>       | 6.6×10 <sup>1</sup>       | 2.0×10 <sup>1</sup>       | 7.5×10 <sup>0</sup>       | 2.8×10 <sup>1</sup>       | 5.7×10 <sup>0</sup>       | 1.3×10 <sup>1</sup>       | 9.6×10 <sup>0</sup>       | 6.3×10 <sup>0</sup>       | 4.1×10 <sup>0</sup>       | 2.3×10 <sup>0</sup>       | 1.2×10 <sup>0</sup>       | 1.5×10 <sup>0</sup>       | 6.8×10 <sup>-1</sup>      | 1.1×10 <sup>0</sup>       | 1.7×10 <sup>0</sup>       |
| Albania                        | 8.7×10 <sup>1</sup>       | 1.4×10 <sup>1</sup>       | 6.0×10 <sup>0</sup>       | 5.5×10 <sup>0</sup>       | 1.3×10 <sup>1</sup>       | 2.4×10 <sup>0</sup>       | 5.9×10 <sup>0</sup>       | 4.6×10 <sup>0</sup>       | 1.1×10 <sup>0</sup>       | 1.0×10 <sup>0</sup>       | 6.8×10 <sup>-1</sup>      | 7.0×10 <sup>-1</sup>      | 6.9×10 <sup>-1</sup>      | 6.9×10 <sup>-1</sup>      | 3.9×10 <sup>-1</sup>      | 5.5×10 <sup>-1</sup>      |
| Algeria                        | 5.0×10 <sup>2</sup>       | 4.7×10 <sup>1</sup>       | 1.5×10 <sup>1</sup>       | 1.8×10 <sup>1</sup>       | 4.6×10 <sup>1</sup>       | 8.5×10 <sup>0</sup>       | 1.7×10 <sup>1</sup>       | 1.6×10 <sup>1</sup>       | 4.4×10 <sup>0</sup>       | 3.7×10 <sup>0</sup>       | 2.8×10 <sup>0</sup>       | 1.9×10 <sup>0</sup>       | 2.4×10 <sup>0</sup>       | 1.5×10 <sup>0</sup>       | 1.1×10 <sup>0</sup>       | 2.2×10 <sup>0</sup>       |
| American Samoa                 | 5.7×10 <sup>-1</sup>      | 4.0×10 <sup>-1</sup>      | 1.2×10 <sup>-1</sup>      | 5.6×10 <sup>-2</sup>      | 1.6×10 <sup>-1</sup>      | 3.3×10 <sup>-2</sup>      | 6.0×10 <sup>-2</sup>      | 5.2×10 <sup>-2</sup>      | 2.9×10 <sup>-2</sup>      | 1.5×10 <sup>-2</sup>      | 9.7×10 <sup>-3</sup>      | 6.4×10 <sup>-3</sup>      | 9.6×10 <sup>-3</sup>      | 5.6×10 <sup>-3</sup>      | 3.2×10 <sup>-3</sup>      | 5.9×10 <sup>-3</sup>      |
| Andorra                        | 5.0×10 <sup>-1</sup>      | 2.0×10 <sup>-1</sup>      | 1.0×10 <sup>-1</sup>      | 1.1×10 <sup>-1</sup>      | 2.4×10 <sup>-1</sup>      | 4.3×10 <sup>-2</sup>      | 1.2×10 <sup>-1</sup>      | 8.1×10 <sup>-2</sup>      | 2.2×10 <sup>-2</sup>      | 2.0×10 <sup>-2</sup>      | 1.6×10 <sup>-2</sup>      | 1.6×10 <sup>-2</sup>      | 1.6×10 <sup>-2</sup>      | 1.1×10 <sup>-2</sup>      | 3.7×10 <sup>-3</sup>      | 9.6×10 <sup>-3</sup>      |
| Angola                         | 2.2×10 <sup>3</sup>       | 5.5×10 <sup>2</sup>       | 3.6×10 <sup>2</sup>       | 1.6×10 <sup>2</sup>       | 4.8×10 <sup>2</sup>       | 8.2×10 <sup>1</sup>       | 2.9×10 <sup>2</sup>       | 2.1×10 <sup>2</sup>       | 4.1×10 <sup>1</sup>       | 3.5×10 <sup>1</sup>       | 1.5×10 <sup>1</sup>       | 2.8×10 <sup>1</sup>       | 2.3×10 <sup>1</sup>       | 5.4×10 <sup>1</sup>       | 3.2×10 <sup>1</sup>       | 1.5×10 <sup>1</sup>       |
| Anguilla                       | 0                         | 0                         | 0                         | 0                         | 0                         | 0                         | 0                         | 0                         | 0                         | 0                         | 0                         | 0                         | 0                         | 0                         | 0                         | 0                         |
| Antigua and Barbuda            | 2.6×10 <sup>-1</sup>      | 1.7×10 <sup>-1</sup>      | 5.5×10 <sup>-2</sup>      | 2.8×10 <sup>-2</sup>      | 8.1×10 <sup>-2</sup>      | 1.7×10 <sup>-2</sup>      | 3.3×10 <sup>-2</sup>      | 2.5×10 <sup>-2</sup>      | 1.2×10 <sup>-2</sup>      | 7.0×10 <sup>-3</sup>      | 4.8×10 <sup>-3</sup>      | 3.7×10 <sup>-3</sup>      | 4.6×10 <sup>-3</sup>      | 2.8×10 <sup>-3</sup>      | 1.6×10 <sup>-3</sup>      | 2.8×10 <sup>-3</sup>      |
| Argentina                      | 1.4×10 <sup>3</sup>       | 1.3×10 <sup>2</sup>       | 8.3×10 <sup>1</sup>       | 4.8×10 <sup>1</sup>       | 1.6×10 <sup>2</sup>       | 3.0×10 <sup>1</sup>       | 9.9×10 <sup>1</sup>       | 7.0×10 <sup>1</sup>       | 2.0×10 <sup>1</sup>       | 2.1×10 <sup>1</sup>       | 1.0×10 <sup>1</sup>       | 9.8×10 <sup>0</sup>       | 6.9×10 <sup>0</sup>       | 1.1×10 <sup>1</sup>       | 9.5×10 <sup>0</sup>       | 1.0×10 <sup>1</sup>       |
| Armenia                        | 2.9×10 <sup>1</sup>       | 3.2×10 <sup>0</sup>       | 1.4×10 <sup>0</sup>       | 8.8×10 <sup>-1</sup>      | 2.7×10 <sup>0</sup>       | 4.9×10 <sup>-1</sup>      | 1.0×10 <sup>0</sup>       | 8.2×10 <sup>-1</sup>      | 3.2×10 <sup>-1</sup>      | 2.9×10 <sup>-1</sup>      | 2.1×10 <sup>-1</sup>      | 1.1×10 <sup>-1</sup>      | 1.2×10 <sup>-1</sup>      | 5.4×10 <sup>-2</sup>      | 8.9×10 <sup>-2</sup>      | 1.5×10 <sup>-1</sup>      |
| Aruba                          | 5.3×10 <sup>-1</sup>      | 3.3×10 <sup>-1</sup>      | 1.1×10 <sup>-1</sup>      | 5.8×10 <sup>-2</sup>      | 1.6×10 <sup>-1</sup>      | 3.2×10 <sup>-2</sup>      | 6.5×10 <sup>-2</sup>      | 5.5×10 <sup>-2</sup>      | 2.5×10 <sup>-2</sup>      | 1.4×10 <sup>-2</sup>      | 1.0×10 <sup>-2</sup>      | 7.6×10 <sup>-3</sup>      | 1.0×10 <sup>-2</sup>      | 6.1×10 <sup>-3</sup>      | 2.9×10 <sup>-3</sup>      | 6.0×10 <sup>-3</sup>      |
| Australia                      | 1.1×10 <sup>3</sup>       | 3.1×10 <sup>2</sup>       | 1.6×10 <sup>2</sup>       | 7.7×10 <sup>1</sup>       | 2.8×10 <sup>2</sup>       | 4.1×10 <sup>1</sup>       | 1.3×10 <sup>2</sup>       | 9.1×10 <sup>1</sup>       | 2.5×10 <sup>1</sup>       | 2.4×10 <sup>1</sup>       | 1.7×10 <sup>1</sup>       | 1.3×10 <sup>1</sup>       | 1.3×10 <sup>1</sup>       | 2.2×10 <sup>1</sup>       | 1.2×10 <sup>1</sup>       | 1.6×10 <sup>1</sup>       |
| Austria                        | 2.9×10 <sup>2</sup>       | 1.4×10 <sup>2</sup>       | 4.8×10 <sup>1</sup>       | 2.9×10 <sup>1</sup>       | 8.1×10 <sup>1</sup>       | 1.7×10 <sup>1</sup>       | 3.5×10 <sup>1</sup>       | 2.6×10 <sup>1</sup>       | 1.1×10 <sup>1</sup>       | 7.5×10 <sup>0</sup>       | 5.3×10 <sup>0</sup>       | 4.3×10 <sup>0</sup>       | 5.1×10 <sup>0</sup>       | 2.9×10 <sup>0</sup>       | 1.7×10 <sup>0</sup>       | 3.4×10 <sup>0</sup>       |
| Azerbaijan                     | 1.8×10 <sup>2</sup>       | 1.1×10 <sup>1</sup>       | 5.0×10 <sup>0</sup>       | 5.1×10 <sup>0</sup>       | 1.5×10 <sup>1</sup>       | 2.7×10 <sup>0</sup>       | 5.1×10 <sup>0</sup>       | 4.3×10 <sup>0</sup>       | 1.1×10 <sup>0</sup>       | 1.4×10 <sup>0</sup>       | 9.3×10 <sup>-1</sup>      | 5.6×10 <sup>-1</sup>      | 5.0×10 <sup>-1</sup>      | 3.7×10 <sup>-1</sup>      | 4.0×10 <sup>-1</sup>      | 9.4×10 <sup>-1</sup>      |
| Bahamas, The                   | 2.5×10 <sup>0</sup>       | 1.5×10 <sup>0</sup>       | 5.0×10 <sup>-1</sup>      | 2.8×10 <sup>-1</sup>      | 7.7×10 <sup>-1</sup>      | 1.5×10 <sup>-1</sup>      | 3.1×10 <sup>-1</sup>      | 2.5×10 <sup>-1</sup>      | 1.1×10 <sup>-1</sup>      | 6.7×10 <sup>-2</sup>      | 4.6×10 <sup>-2</sup>      | 3.5×10 <sup>-2</sup>      | 4.4×10 <sup>-2</sup>      | 3.2×10 <sup>-2</sup>      | 1.7×10 <sup>-2</sup>      | 2.7×10 <sup>-2</sup>      |
| Bahrain                        | 1.1×10 <sup>1</sup>       | 6.9×10 <sup>-1</sup>      | 2.2×10 <sup>-1</sup>      | 1.1×10 <sup>0</sup>       | 3.9×10 <sup>1</sup>       | 1.7×10 <sup>-1</sup>      | 1.0×10 <sup>1</sup>       | 2.6×10 <sup>0</sup>       | 2.8×10 <sup>-1</sup>      | 4.3×10 <sup>0</sup>       | 5.4×10 <sup>0</sup>       | 8.8×10 <sup>-1</sup>      | 1.1×10 <sup>0</sup>       | 3.4×10 <sup>0</sup>       | 4.1×10 <sup>-1</sup>      | 6.5×10 <sup>0</sup>       |
| Bangladesh                     | 1.9×10 <sup>3</sup>       | 1.0×10 <sup>3</sup>       | 3.4×10 <sup>2</sup>       | 1.5×10 <sup>2</sup>       | 4.8×10 <sup>2</sup>       | 1.0×10 <sup>2</sup>       | 2.2×10 <sup>2</sup>       | 1.7×10 <sup>2</sup>       | 7.6×10 <sup>1</sup>       | 4.1×10 <sup>1</sup>       | 2.6×10 <sup>1</sup>       | 2.0×10 <sup>1</sup>       | 2.8×10 <sup>1</sup>       | 1.5×10 <sup>1</sup>       | 1.0×10 <sup>1</sup>       | 1.6×10 <sup>1</sup>       |
| Barbados                       | 5.2×10 <sup>-1</sup>      | 2.6×10 <sup>-1</sup>      | 9.7×10 <sup>-2</sup>      | 7.3×10 <sup>-2</sup>      | 1.9×10 <sup>-1</sup>      | 3.7×10 <sup>-2</sup>      | 7.9×10 <sup>-2</sup>      | 6.1×10 <sup>-2</sup>      | 2.2×10 <sup>-2</sup>      | 1.6×10 <sup>-2</sup>      | 1.2×10 <sup>-2</sup>      | 1.0×10 <sup>-2</sup>      | 1.1×10 <sup>-2</sup>      | 7.3×10 <sup>-3</sup>      | 3.1×10 <sup>-3</sup>      | 6.9×10 <sup>-3</sup>      |
| Belarus                        | 2.9×10 <sup>2</sup>       | 5.7×10 <sup>1</sup>       | 2.4×10 <sup>1</sup>       | 2.0×10 <sup>1</sup>       | 5.0×10 <sup>1</sup>       | 9.6×10 <sup>0</sup>       | 2.1×10 <sup>1</sup>       | 1.6×10 <sup>1</sup>       | 4.9×10 <sup>0</sup>       | 4.3×10 <sup>0</sup>       | 3.4×10 <sup>0</sup>       | 2.8×10 <sup>0</sup>       | 2.9×10 <sup>0</sup>       | 1.8×10 <sup>0</sup>       | 1.0×10 <sup>0</sup>       | 2.2×10 <sup>0</sup>       |
| Belgium                        | 1.3×10 <sup>2</sup>       | 2.8×10 <sup>1</sup>       | 8.3×10 <sup>0</sup>       | 7.7×10 <sup>0</sup>       | 2.1×10 <sup>1</sup>       | 5.4×10 <sup>0</sup>       | 8.8×10 <sup>0</sup>       | 8.4×10 <sup>0</sup>       | 2.7×10 <sup>0</sup>       | 2.1×10 <sup>0</sup>       | 1.7×10 <sup>0</sup>       | 1.1×10 <sup>0</sup>       | 1.4×10 <sup>0</sup>       | 8.2×10 <sup>-1</sup>      | 4.2×10 <sup>-1</sup>      | 1.2×10 <sup>0</sup>       |
| Belize                         | 4.3×10 <sup>1</sup>       | 2.9×10 <sup>1</sup>       | 9.0×10 <sup>0</sup>       | 3.5×10 <sup>0</sup>       | 1.1×10 <sup>1</sup>       | 2.2×10 <sup>0</sup>       | 4.1×10 <sup>0</sup>       | 3.5×10 <sup>0</sup>       | 2.0×10 <sup>0</sup>       | 9.6×10 <sup>-1</sup>      | 5.7×10 <sup>-1</sup>      | 3.9×10 <sup>-1</sup>      | 5.7×10 <sup>-1</sup>      | 4.8×10 <sup>-1</sup>      | 3.1×10 <sup>-1</sup>      | 3.7×10 <sup>-1</sup>      |
| Benin                          | 3.6×10 <sup>2</sup>       | 2.1×10 <sup>2</sup>       | 6.1×10 <sup>1</sup>       | 2.6×10 <sup>1</sup>       | 8.0×10 <sup>1</sup>       | 1.6×10 <sup>1</sup>       | 2.7×10 <sup>1</sup>       | 2.5×10 <sup>1</sup>       | 1.4×10 <sup>1</sup>       | 6.7×10 <sup>0</sup>       | 4.0×10 <sup>0</sup>       | 2.6×10 <sup>0</sup>       | 4.0×10 <sup>0</sup>       | 2.9×10 <sup>0</sup>       | 2.0×10 <sup>0</sup>       | 2.7×10 <sup>0</sup>       |
| Bermuda                        | 3.3×10 <sup>-2</sup>      | 9.3×10 <sup>-3</sup>      | 8.7×10 <sup>-4</sup>      | 4.7×10 <sup>-3</sup>      | 1.2×10 <sup>-2</sup>      | 3.4×10 <sup>-3</sup>      | 5.4×10 <sup>-3</sup>      | 7.3×10 <sup>-3</sup>      | 1.5×10 <sup>-3</sup>      | 1.4×10 <sup>-3</sup>      | 9.2×10 <sup>-4</sup>      | 7.8×10 <sup>-4</sup>      | 1.2×10 <sup>-3</sup>      | 4.8×10 <sup>-4</sup>      | 6.9×10 <sup>-5</sup>      | 5.4×10 <sup>-4</sup>      |
| Bhutan                         | 2.7×10 <sup>2</sup>       | 2.0×10 <sup>2</sup>       | 5.7×10 <sup>1</sup>       | 2.2×10 <sup>1</sup>       | 7.1×10 <sup>1</sup>       | 1.4×10 <sup>1</sup>       | 2.4×10 <sup>1</sup>       | 2.1×10 <sup>1</sup>       | 1.3×10 <sup>1</sup>       | 6.3×10 <sup>0</sup>       | 3.9×10 <sup>0</sup>       | 2.3×10 <sup>0</sup>       | 3.7×10 <sup>0</sup>       | 2.2×10 <sup>0</sup>       | 1.5×10 <sup>0</sup>       | 2.4×10 <sup>0</sup>       |
| Bolivia                        | 1.3×10 <sup>3</sup>       | 2.8×10 <sup>2</sup>       | 2.0×10 <sup>2</sup>       | 8.4×10 <sup>1</sup>       | 2.5×10 <sup>2</sup>       | 4.3×10 <sup>1</sup>       | 1.6×10 <sup>2</sup>       | 1.2×10 <sup>2</sup>       | 2.0×10 <sup>1</sup>       | 1.8×10 <sup>1</sup>       | 6.5×10 <sup>0</sup>       | 1.5×10 <sup>1</sup>       | 1.2×10 <sup>1</sup>       | 3.2×10 <sup>1</sup>       | 1.9×10 <sup>1</sup>       | 7.8×10 <sup>0</sup>       |
| Bosnia and Herzegovina         | 1.3×10 <sup>2</sup>       | 3.6×10 <sup>1</sup>       | 1.8×10 <sup>1</sup>       | 9.6×10 <sup>0</sup>       | 3.3×10 <sup>1</sup>       | 5.1×10 <sup>0</sup>       | 1.1×10 <sup>1</sup>       | 8.3×10 <sup>0</sup>       | 3.7×10 <sup>0</sup>       | 5.0×10 <sup>0</sup>       | 3.0×10 <sup>0</sup>       | 2.0×10 <sup>0</sup>       | 1.9×10 <sup>0</sup>       | 1.9×10 <sup>0</sup>       | 1.9×10 <sup>0</sup>       | 3.4×10 <sup>0</sup>       |
| Botswana                       | 8.8×10 <sup>1</sup>       | 3.5×10 <sup>1</sup>       | 1.3×10 <sup>1</sup>       | 7.3×10 <sup>0</sup>       | 2.0×10 <sup>1</sup>       | 3.7×10 <sup>0</sup>       | 8.1×10 <sup>0</sup>       | 6.4×10 <sup>0</sup>       | 2.6×10 <sup>0</sup>       | 1.7×10 <sup>0</sup>       | 1.1×10 <sup>0</sup>       | 9.3×10 <sup>-1</sup>      | 1.1×10 <sup>0</sup>       | 9.4×10 <sup>-1</sup>      | 5.9×10 <sup>-1</sup>      | 7.7×10 <sup>-1</sup>      |
| Brazil                         | 1.5×10 <sup>4</sup>       | 3.5×10 <sup>3</sup>       | 1.9×10 <sup>3</sup>       | 9.1×10 <sup>2</sup>       | 2.8×10 <sup>3</sup>       | 4.8×10 <sup>2</sup>       | 1.6×10 <sup>3</sup>       | 1.2×10 <sup>3</sup>       | 2.7×10 <sup>2</sup>       | 2.7×10 <sup>2</sup>       | 1.4×10 <sup>2</sup>       | 1.6×10 <sup>2</sup>       | 1.5×10 <sup>2</sup>       | 2.9×10 <sup>2</sup>       | 1.7×10 <sup>2</sup>       | 1.1×10 <sup>2</sup>       |
| British Indian Ocean Territory | 0                         | 0                         | 0                         | 0                         | 0                         | 0                         | 0                         | 0                         | 0                         | 0                         | 0                         | 0                         | 0                         | 0                         | 0                         | 0                         |
| British Virgin Islands         | 3.6×10 <sup>-2</sup>      | 1.0×10 <sup>-2</sup>      | 1.0×10 <sup>-3</sup>      | 5.1×10 <sup>-3</sup>      | 1.3×10 <sup>-2</sup>      | 3.7×10 <sup>-3</sup>      | 5.8×10 <sup>-3</sup>      | 7.9×10 <sup>-3</sup>      | 1.6×10 <sup>-3</sup>      | 1.5×10 <sup>-3</sup>      | 9.9×10 <sup>-4</sup>      | 8.4×10 <sup>-4</sup>      | 1.3×10 <sup>-3</sup>      | 5.2×10 <sup>-4</sup>      | 7.6×10 <sup>-5</sup>      | 5.8×10 <sup>-4</sup>      |
| Brunei                         | 2.8×10 <sup>0</sup>       | 1.2×10 <sup>0</sup>       | 4.7×10 <sup>-1</sup>      | 1.9×10 <sup>-1</sup>      | 6.9×10 <sup>-1</sup>      | 1.6×10 <sup>-1</sup>      | 3.9×10 <sup>-1</sup>      | 2.6×10 <sup>-1</sup>      | 8.7×10 <sup>-2</sup>      | 5.5×10 <sup>-2</sup>      | 2.6×10 <sup>-2</sup>      | 2.9×10 <sup>-2</sup>      | 3.4×10 <sup>-2</sup>      | 2.9×10 <sup>-2</sup>      | 2.5×10 <sup>-2</sup>      | 1.7×10 <sup>-2</sup>      |
| Bulgaria                       | 2.8×10 <sup>2</sup>       | 8.5×10 <sup>1</sup>       | 2.9×10 <sup>1</sup>       | 1.8×10 <sup>1</sup>       | 4.9×10 <sup>1</sup>       | 1.0×10 <sup>1</sup>       | 1.8×10 <sup>1</sup>       | 1.5×10 <sup>1</sup>       | 6.7×10 <sup>0</sup>       | 5.2×10 <sup>0</sup>       | 3.1×10 <sup>0</sup>       | 2.4×10 <sup>0</sup>       | 2.8×10 <sup>0</sup>       | 1.8×10 <sup>0</sup>       | 1.6×10 <sup>0</sup>       | 2.6×10 <sup>0</sup>       |
| Burkina Faso                   | 6.9×10 <sup>2</sup>       | 5.2×10 <sup>2</sup>       | 1.5×10 <sup>2</sup>       | 5.7×10 <sup>1</sup>       | 1.8×10 <sup>2</sup>       | 3.7×10 <sup>1</sup>       | 6.0×10 <sup>1</sup>       | 5.4×10 <sup>1</sup>       | 3.5×10 <sup>1</sup>       | 1.6×10 <sup>1</sup>       | 9.9×10 <sup>0</sup>       | 5.7×10 <sup>0</sup>       | 9.4×10 <sup>0</sup>       | 5.9×10 <sup>0</sup>       | 4.1×10 <sup>0</sup>       | 6.1×10 <sup>0</sup>       |
| Burundi                        | 4.8×10 <sup>2</sup>       | 3.7×10 <sup>2</sup>       | 1.0×10 <sup>2</sup>       | 4.0×10 <sup>1</sup>       | 1.3×10 <sup>2</sup>       | 2.6×10 <sup>1</sup>       | 4.1×10 <sup>1</sup>       | 3.7×10 <sup>1</sup>       | 2.5×10 <sup>1</sup>       | 1.1×10 <sup>1</sup>       | 7.0×10 <sup>0</sup>       | 3.9×10 <sup>0</sup>       | 6.6×10 <sup>0</sup>       | 3.8×10 <sup>0</sup>       | 2.7×10 <sup>0</sup>       | 4.3×10 <sup>0</sup>       |
| Cambodia                       | 1.2×10 <sup>3</sup>       | 4.9×10 <sup>2</sup>       | 2.1×10 <sup>2</sup>       | 9.7×10 <sup>1</sup>       | 2.8×10 <sup>2</sup>       | 5.3×10 <sup>1</sup>       | 1.6×10 <sup>2</sup>       | 1.2×10 <sup>2</sup>       | 3.6×10 <sup>1</sup>       | 2.3×10 <sup>1</sup>       | 1.3×10 <sup>1</sup>       | 1.5×10 <sup>1</sup>       | 1.7×10 <sup>1</sup>       | 2.3×10 <sup>1</sup>       | 1.3×10 <sup>1</sup>       | 9.8×10 <sup>0</sup>       |
| Cameroon                       | 8.3×10 <sup>2</sup>       | 4.5×10 <sup>2</sup>       | 1.5×10 <sup>2</sup>       | 7.0×10 <sup>1</sup>       | 2.1×10 <sup>2</sup>       | 4.0×10 <sup>1</sup>       | 8.6×10 <sup>1</sup>       | 6.9×10 <sup>1</sup>       | 3.1×10 <sup>1</sup>       | 1.8×10 <sup>1</sup>       | 1.1×10 <sup>1</sup>       | 8.7×10 <sup>0</sup>       | 1.1×10 <sup>1</sup>       | 1.1×10 <sup>1</sup>       | 6.2×10 <sup>0</sup>       | 7.6×10 <sup>0</sup>       |
| Canada                         | 1.4×10 <sup>3</sup>       | 3.1×10 <sup>2</sup>       | 2.1×10 <sup>2</sup>       | 1.1×10 <sup>2</sup>       | 3.4×10 <sup>2</sup>       | 5.3×10 <sup>1</sup>       | 2.0×10 <sup>2</sup>       | 1.4×10 <sup>2</sup>       | 3.0×10 <sup>1</sup>       | 3.8×10 <sup>1</sup>       | 2.2×10 <sup>1</sup>       | 2.1×10 <sup>1</sup>       | 1.9×10 <sup>1</sup>       | 3.3×10 <sup>1</sup>       | 1.8×10 <sup>1</sup>       | 1.5×10 <sup>1</sup>       |



|                          |                      |                      |                      |                      |                      |                      |                      |                      |                      |                      |                      |                      |                      |                      |                      |                      |
|--------------------------|----------------------|----------------------|----------------------|----------------------|----------------------|----------------------|----------------------|----------------------|----------------------|----------------------|----------------------|----------------------|----------------------|----------------------|----------------------|----------------------|
| Cape Verde               | $9.1 \times 10^{-2}$ | $6.8 \times 10^{-2}$ | $1.9 \times 10^{-2}$ | $8.2 \times 10^{-3}$ | $2.6 \times 10^{-2}$ | $5.4 \times 10^{-3}$ | $9.1 \times 10^{-3}$ | $8.8 \times 10^{-3}$ | $4.9 \times 10^{-3}$ | $2.7 \times 10^{-3}$ | $1.8 \times 10^{-3}$ | $1.1 \times 10^{-3}$ | $1.6 \times 10^{-3}$ | $1.0 \times 10^{-3}$ | $5.4 \times 10^{-4}$ | $1.1 \times 10^{-3}$ |
| Cayman Islands           | $1.6 \times 10^{-2}$ | $4.6 \times 10^{-3}$ | $4.3 \times 10^{-4}$ | $2.3 \times 10^{-3}$ | $6.1 \times 10^{-3}$ | $1.7 \times 10^{-3}$ | $2.6 \times 10^{-3}$ | $3.6 \times 10^{-3}$ | $7.4 \times 10^{-4}$ | $7.1 \times 10^{-4}$ | $4.5 \times 10^{-4}$ | $3.9 \times 10^{-4}$ | $5.9 \times 10^{-4}$ | $2.4 \times 10^{-4}$ | $3.4 \times 10^{-5}$ | $2.7 \times 10^{-4}$ |
| Central African Republic | $1.6 \times 10^3$    | $3.9 \times 10^2$    | $2.7 \times 10^2$    | $1.1 \times 10^2$    | $3.4 \times 10^2$    | $5.6 \times 10^1$    | $2.3 \times 10^2$    | $1.6 \times 10^2$    | $2.8 \times 10^1$    | $2.5 \times 10^1$    | $8.9 \times 10^0$    | $2.1 \times 10^1$    | $1.6 \times 10^1$    | $4.4 \times 10^1$    | $2.6 \times 10^1$    | $1.0 \times 10^1$    |
| Chad                     | $4.8 \times 10^2$    | $3.0 \times 10^2$    | $9.9 \times 10^1$    | $3.9 \times 10^1$    | $1.2 \times 10^2$    | $2.4 \times 10^1$    | $4.8 \times 10^1$    | $4.0 \times 10^1$    | $2.1 \times 10^1$    | $1.0 \times 10^1$    | $6.0 \times 10^0$    | $4.5 \times 10^0$    | $6.2 \times 10^0$    | $6.2 \times 10^0$    | $4.0 \times 10^0$    | $4.0 \times 10^0$    |
| Chile                    | $9.2 \times 10^2$    | $4.7 \times 10^2$    | $1.5 \times 10^2$    | $6.0 \times 10^1$    | $1.9 \times 10^2$    | $4.0 \times 10^1$    | $6.6 \times 10^1$    | $5.7 \times 10^1$    | $3.3 \times 10^1$    | $1.7 \times 10^1$    | $1.0 \times 10^1$    | $6.5 \times 10^0$    | $9.6 \times 10^0$    | $5.8 \times 10^0$    | $4.3 \times 10^0$    | $6.5 \times 10^0$    |
| China                    | $4.6 \times 10^4$    | $1.4 \times 10^4$    | $6.1 \times 10^3$    | $4.7 \times 10^3$    | $1.3 \times 10^4$    | $2.5 \times 10^3$    | $6.1 \times 10^3$    | $4.9 \times 10^3$    | $1.7 \times 10^3$    | $1.8 \times 10^3$    | $1.2 \times 10^3$    | $8.7 \times 10^2$    | $1.1 \times 10^3$    | $6.9 \times 10^2$    | $4.2 \times 10^2$    | $8.7 \times 10^2$    |
| Colombia                 | $9.9 \times 10^2$    | $3.2 \times 10^2$    | $9.5 \times 10^1$    | $5.4 \times 10^1$    | $1.6 \times 10^2$    | $2.9 \times 10^1$    | $5.4 \times 10^1$    | $4.9 \times 10^1$    | $2.2 \times 10^1$    | $1.2 \times 10^1$    | $7.5 \times 10^0$    | $5.4 \times 10^0$    | $7.5 \times 10^0$    | $6.2 \times 10^0$    | $3.8 \times 10^0$    | $5.5 \times 10^0$    |
| Comoros                  | $1.3 \times 10^1$    | $1.0 \times 10^1$    | $2.8 \times 10^0$    | $1.1 \times 10^0$    | $3.4 \times 10^0$    | $7.0 \times 10^{-1}$ | $1.1 \times 10^0$    | $1.0 \times 10^0$    | $6.7 \times 10^{-1}$ | $3.1 \times 10^{-1}$ | $1.9 \times 10^{-1}$ | $1.0 \times 10^{-1}$ | $1.8 \times 10^{-1}$ | $1.0 \times 10^{-1}$ | $7.2 \times 10^{-2}$ | $1.2 \times 10^{-1}$ |
| Congo DR                 | $3.8 \times 10^3$    | $2.8 \times 10^3$    | $8.1 \times 10^2$    | $3.1 \times 10^2$    | $9.8 \times 10^2$    | $2.0 \times 10^2$    | $3.2 \times 10^2$    | $2.9 \times 10^2$    | $1.9 \times 10^2$    | $8.7 \times 10^1$    | $5.4 \times 10^1$    | $3.0 \times 10^1$    | $5.1 \times 10^1$    | $3.0 \times 10^1$    | $2.1 \times 10^1$    | $3.3 \times 10^1$    |
| Congo                    | $2.0 \times 10^3$    | $4.3 \times 10^2$    | $3.3 \times 10^2$    | $1.3 \times 10^2$    | $4.1 \times 10^2$    | $6.7 \times 10^1$    | $2.7 \times 10^2$    | $1.9 \times 10^2$    | $3.1 \times 10^1$    | $3.0 \times 10^1$    | $1.0 \times 10^1$    | $2.5 \times 10^1$    | $1.9 \times 10^1$    | $5.4 \times 10^1$    | $3.2 \times 10^1$    | $1.2 \times 10^1$    |
| Cook Islands             | 0                    | 0                    | 0                    | 0                    | 0                    | 0                    | 0                    | 0                    | 0                    | 0                    | 0                    | 0                    | 0                    | 0                    | 0                    | 0                    |
| Costa Rica               | $1.7 \times 10^2$    | $6.9 \times 10^1$    | $1.9 \times 10^1$    | $9.7 \times 10^0$    | $2.7 \times 10^1$    | $5.4 \times 10^0$    | $8.5 \times 10^0$    | $8.2 \times 10^0$    | $4.6 \times 10^0$    | $2.2 \times 10^0$    | $1.4 \times 10^0$    | $8.2 \times 10^{-1}$ | $1.3 \times 10^0$    | $7.9 \times 10^{-1}$ | $5.1 \times 10^{-1}$ | $9.4 \times 10^{-1}$ |
| Cote d'Ivoire            | $6.5 \times 10^2$    | $3.8 \times 10^2$    | $1.2 \times 10^2$    | $5.6 \times 10^1$    | $1.6 \times 10^2$    | $3.2 \times 10^1$    | $6.7 \times 10^1$    | $5.6 \times 10^1$    | $2.7 \times 10^1$    | $1.4 \times 10^1$    | $9.1 \times 10^0$    | $7.0 \times 10^0$    | $9.7 \times 10^0$    | $7.4 \times 10^0$    | $4.2 \times 10^0$    | $5.9 \times 10^0$    |
| Croatia                  | $1.2 \times 10^2$    | $2.8 \times 10^1$    | $9.2 \times 10^0$    | $6.5 \times 10^0$    | $1.8 \times 10^1$    | $3.3 \times 10^0$    | $6.2 \times 10^0$    | $5.3 \times 10^0$    | $2.0 \times 10^0$    | $1.4 \times 10^0$    | $9.4 \times 10^{-1}$ | $7.3 \times 10^{-1}$ | $8.6 \times 10^{-1}$ | $5.1 \times 10^{-1}$ | $3.4 \times 10^{-1}$ | $6.8 \times 10^{-1}$ |
| Cuba                     | $3.9 \times 10^1$    | $3.7 \times 10^0$    | $1.8 \times 10^0$    | $1.5 \times 10^0$    | $4.1 \times 10^0$    | $7.0 \times 10^{-1}$ | $1.7 \times 10^0$    | $1.5 \times 10^0$    | $2.8 \times 10^{-1}$ | $2.7 \times 10^{-1}$ | $1.8 \times 10^{-1}$ | $2.0 \times 10^{-1}$ | $1.8 \times 10^{-1}$ | $2.9 \times 10^{-1}$ | $1.7 \times 10^{-1}$ | $1.6 \times 10^{-1}$ |
| Cyprus                   | $3.3 \times 10^1$    | $3.1 \times 10^0$    | $3.0 \times 10^0$    | $6.6 \times 10^{-1}$ | $3.0 \times 10^0$    | $4.5 \times 10^{-1}$ | $6.9 \times 10^{-1}$ | $6.3 \times 10^{-1}$ | $2.6 \times 10^{-1}$ | $2.9 \times 10^{-1}$ | $3.7 \times 10^{-1}$ | $1.2 \times 10^{-1}$ | $1.4 \times 10^{-1}$ | $2.4 \times 10^{-2}$ | $1.1 \times 10^{-1}$ | $1.3 \times 10^{-1}$ |
| Czech Republic           | $3.6 \times 10^2$    | $9.0 \times 10^1$    | $4.9 \times 10^1$    | $3.9 \times 10^1$    | $9.9 \times 10^1$    | $1.9 \times 10^1$    | $4.5 \times 10^1$    | $3.2 \times 10^1$    | $1.1 \times 10^1$    | $1.2 \times 10^1$    | $7.7 \times 10^0$    | $7.1 \times 10^0$    | $6.8 \times 10^0$    | $4.6 \times 10^0$    | $4.0 \times 10^0$    | $6.3 \times 10^0$    |
| Denmark                  | $1.7 \times 10^2$    | $5.2 \times 10^1$    | $2.9 \times 10^1$    | $2.8 \times 10^1$    | $6.6 \times 10^1$    | $1.2 \times 10^1$    | $3.4 \times 10^1$    | $2.2 \times 10^1$    | $6.0 \times 10^0$    | $6.0 \times 10^0$    | $4.7 \times 10^0$    | $4.6 \times 10^0$    | $4.5 \times 10^0$    | $2.9 \times 10^0$    | $1.3 \times 10^0$    | $2.8 \times 10^0$    |
| Djibouti                 | $1.0 \times 10^2$    | $7.7 \times 10^1$    | $2.2 \times 10^1$    | $8.4 \times 10^0$    | $2.7 \times 10^1$    | $5.4 \times 10^0$    | $8.6 \times 10^0$    | $7.8 \times 10^0$    | $5.2 \times 10^0$    | $2.4 \times 10^0$    | $1.5 \times 10^0$    | $8.1 \times 10^{-1}$ | $1.4 \times 10^0$    | $7.9 \times 10^{-1}$ | $5.6 \times 10^{-1}$ | $9.0 \times 10^{-1}$ |
| Dominica                 | $1.4 \times 10^{-1}$ | $7.2 \times 10^{-2}$ | $2.7 \times 10^{-2}$ | $2.0 \times 10^{-2}$ | $5.1 \times 10^{-2}$ | $9.8 \times 10^{-3}$ | $2.2 \times 10^{-2}$ | $1.6 \times 10^{-2}$ | $6.1 \times 10^{-3}$ | $4.3 \times 10^{-3}$ | $3.3 \times 10^{-3}$ | $2.8 \times 10^{-3}$ | $3.0 \times 10^{-3}$ | $2.0 \times 10^{-3}$ | $8.6 \times 10^{-4}$ | $1.9 \times 10^{-3}$ |
| Dominican Republic       | $2.1 \times 10^2$    | $5.1 \times 10^1$    | $1.7 \times 10^1$    | $1.3 \times 10^1$    | $3.0 \times 10^1$    | $5.8 \times 10^0$    | $1.4 \times 10^1$    | $1.2 \times 10^1$    | $4.0 \times 10^0$    | $2.6 \times 10^0$    | $1.9 \times 10^0$    | $1.7 \times 10^0$    | $2.3 \times 10^0$    | $1.4 \times 10^0$    | $5.5 \times 10^{-1}$ | $1.3 \times 10^0$    |
| Ecuador                  | $4.0 \times 10^2$    | $8.4 \times 10^1$    | $2.2 \times 10^1$    | $1.7 \times 10^1$    | $4.3 \times 10^1$    | $8.2 \times 10^0$    | $1.3 \times 10^1$    | $1.3 \times 10^1$    | $5.3 \times 10^0$    | $2.9 \times 10^0$    | $1.8 \times 10^0$    | $1.3 \times 10^0$    | $1.8 \times 10^0$    | $1.2 \times 10^0$    | $7.7 \times 10^{-1}$ | $1.5 \times 10^0$    |
| Egypt                    | $1.6 \times 10^3$    | $2.3 \times 10^2$    | $6.5 \times 10^1$    | $6.1 \times 10^1$    | $1.7 \times 10^2$    | $3.6 \times 10^1$    | $6.1 \times 10^1$    | $5.6 \times 10^1$    | $1.9 \times 10^1$    | $1.5 \times 10^1$    | $1.1 \times 10^1$    | $6.5 \times 10^0$    | $8.1 \times 10^0$    | $5.4 \times 10^0$    | $3.5 \times 10^0$    | $9.6 \times 10^0$    |
| El Salvador              | $2.9 \times 10^2$    | $1.7 \times 10^2$    | $4.7 \times 10^1$    | $2.1 \times 10^1$    | $6.3 \times 10^1$    | $1.3 \times 10^1$    | $2.1 \times 10^1$    | $1.9 \times 10^1$    | $1.1 \times 10^1$    | $5.4 \times 10^0$    | $3.4 \times 10^0$    | $2.1 \times 10^0$    | $3.3 \times 10^0$    | $1.9 \times 10^0$    | $1.3 \times 10^0$    | $2.2 \times 10^0$    |
| Equatorial Guinea        | $1.0 \times 10^1$    | $7.8 \times 10^0$    | $2.2 \times 10^0$    | $8.5 \times 10^{-1}$ | $2.7 \times 10^0$    | $5.5 \times 10^{-1}$ | $8.7 \times 10^{-1}$ | $8.0 \times 10^{-1}$ | $5.3 \times 10^{-1}$ | $2.4 \times 10^{-1}$ | $1.5 \times 10^{-1}$ | $8.2 \times 10^{-2}$ | $1.4 \times 10^{-1}$ | $8.0 \times 10^{-2}$ | $5.6 \times 10^{-2}$ | $9.1 \times 10^{-2}$ |
| Eritrea                  | $7.0 \times 10^1$    | $5.0 \times 10^1$    | $1.4 \times 10^1$    | $5.6 \times 10^0$    | $1.7 \times 10^1$    | $3.5 \times 10^0$    | $5.6 \times 10^0$    | $5.1 \times 10^0$    | $3.3 \times 10^0$    | $1.5 \times 10^0$    | $9.5 \times 10^{-1}$ | $5.3 \times 10^{-1}$ | $9.0 \times 10^{-1}$ | $5.2 \times 10^{-1}$ | $3.7 \times 10^{-1}$ | $5.9 \times 10^{-1}$ |
| Estonia                  | $9.6 \times 10^1$    | $3.7 \times 10^1$    | $1.3 \times 10^1$    | $9.2 \times 10^0$    | $2.5 \times 10^1$    | $4.8 \times 10^0$    | $1.1 \times 10^1$    | $7.7 \times 10^0$    | $2.9 \times 10^0$    | $2.1 \times 10^0$    | $1.5 \times 10^0$    | $1.3 \times 10^0$    | $1.5 \times 10^0$    | $8.8 \times 10^{-1}$ | $4.7 \times 10^{-1}$ | $9.5 \times 10^{-1}$ |
| Ethiopia                 | $6.7 \times 10^3$    | $4.9 \times 10^3$    | $1.4 \times 10^3$    | $5.5 \times 10^2$    | $1.7 \times 10^3$    | $3.5 \times 10^2$    | $5.7 \times 10^2$    | $5.1 \times 10^2$    | $3.3 \times 10^2$    | $1.5 \times 10^2$    | $9.5 \times 10^1$    | $5.3 \times 10^1$    | $8.9 \times 10^1$    | $5.4 \times 10^1$    | $3.8 \times 10^1$    | $5.9 \times 10^1$    |
| Falkland Islands         | $2.5 \times 10^{-1}$ | $1.9 \times 10^{-1}$ | $5.5 \times 10^{-2}$ | $2.1 \times 10^{-2}$ | $6.7 \times 10^{-2}$ | $1.4 \times 10^{-2}$ | $2.2 \times 10^{-2}$ | $2.0 \times 10^{-2}$ | $1.3 \times 10^{-2}$ | $6.0 \times 10^{-3}$ | $3.7 \times 10^{-3}$ | $2.1 \times 10^{-3}$ | $3.5 \times 10^{-3}$ | $2.0 \times 10^{-3}$ | $1.4 \times 10^{-3}$ | $2.3 \times 10^{-3}$ |
| Faroe Islands            | $2.6 \times 10^{-1}$ | $1.0 \times 10^{-1}$ | $5.3 \times 10^{-2}$ | $5.6 \times 10^{-2}$ | $1.2 \times 10^{-1}$ | $2.2 \times 10^{-2}$ | $6.0 \times 10^{-2}$ | $4.2 \times 10^{-2}$ | $1.1 \times 10^{-2}$ | $1.0 \times 10^{-2}$ | $8.4 \times 10^{-3}$ | $8.0 \times 10^{-3}$ | $8.4 \times 10^{-3}$ | $5.7 \times 10^{-3}$ | $1.9 \times 10^{-3}$ | $5.0 \times 10^{-3}$ |
| Fiji                     | $3.4 \times 10^0$    | $1.7 \times 10^0$    | $6.2 \times 10^{-1}$ | $3.2 \times 10^{-1}$ | $8.6 \times 10^{-1}$ | $1.7 \times 10^{-1}$ | $4.3 \times 10^{-1}$ | $3.5 \times 10^{-1}$ | $1.4 \times 10^{-1}$ | $8.3 \times 10^{-2}$ | $6.1 \times 10^{-2}$ | $4.8 \times 10^{-2}$ | $6.7 \times 10^{-2}$ | $4.3 \times 10^{-2}$ | $2.0 \times 10^{-2}$ | $3.7 \times 10^{-2}$ |
| Finland                  | $2.5 \times 10^2$    | $1.5 \times 10^2$    | $4.4 \times 10^1$    | $1.8 \times 10^1$    | $6.0 \times 10^1$    | $1.3 \times 10^1$    | $2.2 \times 10^1$    | $1.8 \times 10^1$    | $1.0 \times 10^1$    | $5.8 \times 10^0$    | $3.6 \times 10^0$    | $2.5 \times 10^0$    | $3.5 \times 10^0$    | $1.8 \times 10^0$    | $1.5 \times 10^0$    | $2.4 \times 10^0$    |
| France                   | $1.5 \times 10^3$    | $7.4 \times 10^2$    | $2.4 \times 10^2$    | $1.1 \times 10^2$    | $3.6 \times 10^2$    | $7.6 \times 10^1$    | $1.4 \times 10^2$    | $1.1 \times 10^2$    | $5.6 \times 10^1$    | $3.7 \times 10^1$    | $2.4 \times 10^1$    | $1.6 \times 10^1$    | $2.1 \times 10^1$    | $1.1 \times 10^1$    | $9.5 \times 10^0$    | $1.7 \times 10^1$    |
| French Guiana            | $3.6 \times 10^0$    | $2.8 \times 10^0$    | $7.9 \times 10^{-1}$ | $3.1 \times 10^{-1}$ | $9.6 \times 10^{-1}$ | $1.9 \times 10^{-1}$ | $3.2 \times 10^{-1}$ | $2.9 \times 10^{-1}$ | $1.9 \times 10^{-1}$ | $8.5 \times 10^{-2}$ | $5.3 \times 10^{-2}$ | $3.0 \times 10^{-2}$ | $5.1 \times 10^{-2}$ | $2.9 \times 10^{-2}$ | $2.0 \times 10^{-2}$ | $3.3 \times 10^{-2}$ |
| French Polynesia         | $4.6 \times 10^{-1}$ | $2.2 \times 10^{-1}$ | $8.9 \times 10^{-2}$ | $7.1 \times 10^{-2}$ | $1.7 \times 10^{-1}$ | $3.2 \times 10^{-2}$ | $8.2 \times 10^{-2}$ | $6.2 \times 10^{-2}$ | $2.1 \times 10^{-2}$ | $1.5 \times 10^{-2}$ | $1.2 \times 10^{-2}$ | $1.0 \times 10^{-2}$ | $1.2 \times 10^{-2}$ | $8.0 \times 10^{-3}$ | $2.8 \times 10^{-3}$ | $7.1 \times 10^{-3}$ |
| Gabon                    | $6.8 \times 10^1$    | $3.0 \times 10^1$    | $1.2 \times 10^1$    | $8.2 \times 10^0$    | $2.1 \times 10^1$    | $4.0 \times 10^0$    | $9.2 \times 10^0$    | $6.9 \times 10^0$    | $2.5 \times 10^0$    | $1.7 \times 10^0$    | $1.3 \times 10^0$    | $1.1 \times 10^0$    | $1.2 \times 10^0$    | $9.2 \times 10^{-1}$ | $4.2 \times 10^{-1}$ | $7.6 \times 10^{-1}$ |
| Georgia                  | $1.2 \times 10^2$    | $2.5 \times 10^1$    | $8.7 \times 10^0$    | $7.8 \times 10^0$    | $1.9 \times 10^1$    | $3.6 \times 10^0$    | $7.8 \times 10^0$    | $6.1 \times 10^0$    | $1.9 \times 10^0$    | $1.5 \times 10^0$    | $1.1 \times 10^0$    | $9.7 \times 10^{-1}$ | $1.0 \times 10^0$    | $6.8 \times 10^{-1}$ | $3.6 \times 10^{-1}$ | $7.6 \times 10^{-1}$ |
| Germany                  | $1.3 \times 10^3$    | $3.7 \times 10^2$    | $1.7 \times 10^2$    | $1.4 \times 10^2$    | $3.6 \times 10^2$    | $7.1 \times 10^1$    | $1.7 \times 10^2$    | $1.2 \times 10^2$    | $3.8 \times 10^1$    | $3.6 \times 10^1$    | $2.8 \times 10^1$    | $2.3 \times 10^1$    | $2.4 \times 10^1$    | $1.6 \times 10^1$    | $8.7 \times 10^0$    | $2.0 \times 10^1$    |
| Ghana                    | $1.0 \times 10^3$    | $5.9 \times 10^2$    | $1.8 \times 10^2$    | $7.4 \times 10^1$    | $2.3 \times 10^2$    | $4.5 \times 10^1$    | $8.3 \times 10^1$    | $7.2 \times 10^1$    | $4.0 \times 10^1$    | $1.9 \times 10^1$    | $1.2 \times 10^1$    | $7.8 \times 10^0$    | $1.2 \times 10^1$    | $9.6 \times 10^0$    | $6.3 \times 10^0$    | $7.7 \times 10^0$    |
| Gibraltar                | $2.3 \times 10^0$    | $9.4 \times 10^{-2}$ | $1.9 \times 10^{-2}$ | $6.2 \times 10^{-2}$ | $9.5 \times 10^{-2}$ | $1.7 \times 10^{-2}$ | $2.3 \times 10^{-2}$ | $3.4 \times 10^{-2}$ | $3.9 \times 10^{-3}$ | $4.2 \times 10^{-3}$ | $3.2 \times 10^{-3}$ | $2.6$                |                      |                      |                      |                      |

|                  |                        |                      |                      |                      |                      |                      |                      |                      |                      |                      |                      |                      |                      |                      |                      |                      |
|------------------|------------------------|----------------------|----------------------|----------------------|----------------------|----------------------|----------------------|----------------------|----------------------|----------------------|----------------------|----------------------|----------------------|----------------------|----------------------|----------------------|
| Guinea-Bissau    | $3.4 \times 10^1$      | $2.0 \times 10^1$    | $6.8 \times 10^0$    | $2.7 \times 10^0$    | $8.3 \times 10^0$    | $1.6 \times 10^0$    | $3.5 \times 10^0$    | $2.9 \times 10^0$    | $1.3 \times 10^0$    | $7.0 \times 10^{-1}$ | $3.9 \times 10^{-1}$ | $3.2 \times 10^{-1}$ | $4.2 \times 10^{-1}$ | $4.9 \times 10^{-1}$ | $3.1 \times 10^{-1}$ | $2.7 \times 10^{-1}$ |
| Guyana           | $4.7 \times 10^1$      | $3.6 \times 10^1$    | $1.0 \times 10^1$    | $3.9 \times 10^0$    | $1.2 \times 10^1$    | $2.5 \times 10^0$    | $4.0 \times 10^0$    | $3.7 \times 10^0$    | $2.4 \times 10^0$    | $1.1 \times 10^0$    | $6.9 \times 10^{-1}$ | $3.8 \times 10^{-1}$ | $6.5 \times 10^{-1}$ | $3.7 \times 10^{-1}$ | $2.6 \times 10^{-1}$ | $4.2 \times 10^{-1}$ |
| Haiti            | $1.8 \times 10^2$      | $9.5 \times 10^1$    | $3.1 \times 10^1$    | $1.7 \times 10^1$    | $4.6 \times 10^1$    | $9.1 \times 10^0$    | $2.0 \times 10^1$    | $1.6 \times 10^1$    | $7.2 \times 10^0$    | $4.1 \times 10^0$    | $2.9 \times 10^0$    | $2.3 \times 10^0$    | $3.1 \times 10^0$    | $1.8 \times 10^0$    | $8.6 \times 10^{-1}$ | $1.8 \times 10^0$    |
| Honduras         | $4.7 \times 10^2$      | $2.8 \times 10^2$    | $7.9 \times 10^1$    | $3.3 \times 10^1$    | $1.0 \times 10^2$    | $2.0 \times 10^1$    | $3.3 \times 10^1$    | $3.1 \times 10^1$    | $1.9 \times 10^1$    | $8.7 \times 10^0$    | $5.3 \times 10^0$    | $3.2 \times 10^0$    | $5.1 \times 10^0$    | $3.2 \times 10^0$    | $2.2 \times 10^0$    | $3.4 \times 10^0$    |
| Hungary          | $2.6 \times 10^2$      | $7.8 \times 10^1$    | $2.6 \times 10^1$    | $1.4 \times 10^1$    | $4.1 \times 10^1$    | $8.7 \times 10^0$    | $1.5 \times 10^1$    | $1.3 \times 10^1$    | $6.3 \times 10^0$    | $4.9 \times 10^0$    | $2.8 \times 10^0$    | $2.0 \times 10^0$    | $2.4 \times 10^0$    | $1.3 \times 10^0$    | $1.5 \times 10^0$    | $2.3 \times 10^0$    |
| Iceland          | $4.9 \times 10^0$      | $1.4 \times 10^0$    | $7.4 \times 10^{-1}$ | $1.0 \times 10^0$    | $1.3 \times 10^1$    | $3.3 \times 10^{-1}$ | $3.9 \times 10^0$    | $1.3 \times 10^0$    | $2.2 \times 10^{-1}$ | $1.3 \times 10^0$    | $1.6 \times 10^0$    | $3.5 \times 10^{-1}$ | $4.1 \times 10^{-1}$ | $9.7 \times 10^{-1}$ | $1.4 \times 10^{-1}$ | $1.8 \times 10^0$    |
| India            | $2.8 \times 10^4$      | $1.4 \times 10^4$    | $4.6 \times 10^3$    | $2.5 \times 10^3$    | $7.2 \times 10^3$    | $1.5 \times 10^3$    | $3.4 \times 10^3$    | $2.6 \times 10^3$    | $1.1 \times 10^3$    | $7.3 \times 10^2$    | $4.6 \times 10^2$    | $3.6 \times 10^2$    | $4.6 \times 10^2$    | $2.7 \times 10^2$    | $1.8 \times 10^2$    | $3.1 \times 10^2$    |
| Indonesia        | $8.9 \times 10^3$      | $3.4 \times 10^3$    | $1.2 \times 10^3$    | $7.5 \times 10^2$    | $1.9 \times 10^3$    | $3.7 \times 10^2$    | $9.5 \times 10^2$    | $7.7 \times 10^2$    | $2.8 \times 10^2$    | $1.7 \times 10^2$    | $1.3 \times 10^2$    | $1.1 \times 10^2$    | $1.5 \times 10^2$    | $9.3 \times 10^1$    | $3.8 \times 10^1$    | $8.2 \times 10^1$    |
| Iran             | $2.6 \times 10^3$      | $1.5 \times 10^2$    | $3.5 \times 10^1$    | $7.8 \times 10^1$    | $1.8 \times 10^2$    | $3.3 \times 10^1$    | $6.4 \times 10^1$    | $6.0 \times 10^1$    | $1.4 \times 10^1$    | $1.5 \times 10^1$    | $1.1 \times 10^1$    | $6.9 \times 10^0$    | $7.4 \times 10^0$    | $5.1 \times 10^0$    | $4.1 \times 10^0$    | $1.1 \times 10^1$    |
| Iraq             | $1.1 \times 10^3$      | $6.2 \times 10^1$    | $1.0 \times 10^1$    | $3.3 \times 10^1$    | $7.0 \times 10^1$    | $1.2 \times 10^1$    | $2.0 \times 10^1$    | $2.1 \times 10^1$    | $3.4 \times 10^0$    | $3.7 \times 10^0$    | $2.3 \times 10^0$    | $2.1 \times 10^0$    | $2.1 \times 10^0$    | $1.3 \times 10^0$    | $1.0 \times 10^0$    | $2.9 \times 10^0$    |
| Ireland          | $4.5 \times 10^1$      | $8.1 \times 10^0$    | $1.2 \times 10^1$    | $5.1 \times 10^0$    | $1.3 \times 10^1$    | $2.2 \times 10^0$    | $5.1 \times 10^0$    | $3.3 \times 10^0$    | $1.9 \times 10^0$    | $3.5 \times 10^0$    | $1.6 \times 10^0$    | $1.6 \times 10^0$    | $1.1 \times 10^0$    | $9.3 \times 10^{-1}$ | $1.8 \times 10^0$    | $2.0 \times 10^0$    |
| Israel           | $3.9 \times 10^1$      | $1.5 \times 10^0$    | $6.1 \times 10^{-1}$ | $1.0 \times 10^0$    | $2.5 \times 10^0$    | $3.8 \times 10^{-1}$ | $9.0 \times 10^{-1}$ | $8.3 \times 10^{-1}$ | $2.3 \times 10^{-1}$ | $2.3 \times 10^{-1}$ | $1.5 \times 10^{-1}$ | $1.1 \times 10^{-1}$ | $8.8 \times 10^{-2}$ | $5.4 \times 10^{-2}$ | $1.3 \times 10^{-1}$ | $1.4 \times 10^{-1}$ |
| Italy            | $5.8 \times 10^2$      | $1.5 \times 10^2$    | $5.0 \times 10^1$    | $3.0 \times 10^1$    | $9.1 \times 10^1$    | $2.2 \times 10^1$    | $3.7 \times 10^1$    | $3.2 \times 10^1$    | $1.2 \times 10^1$    | $9.1 \times 10^0$    | $6.9 \times 10^0$    | $4.2 \times 10^0$    | $5.3 \times 10^0$    | $3.6 \times 10^0$    | $2.2 \times 10^0$    | $5.1 \times 10^0$    |
| Jamaica          | $7.2 \times 10^1$      | $2.1 \times 10^1$    | $5.6 \times 10^0$    | $3.5 \times 10^0$    | $9.2 \times 10^0$    | $1.8 \times 10^0$    | $2.8 \times 10^0$    | $2.8 \times 10^0$    | $1.4 \times 10^0$    | $6.9 \times 10^{-1}$ | $4.3 \times 10^{-1}$ | $2.8 \times 10^{-1}$ | $4.2 \times 10^{-1}$ | $2.5 \times 10^{-1}$ | $1.6 \times 10^{-1}$ | $3.2 \times 10^{-1}$ |
| Japan            | $1.1 \times 10^3$      | $1.5 \times 10^2$    | $3.8 \times 10^1$    | $7.0 \times 10^1$    | $1.8 \times 10^2$    | $4.9 \times 10^1$    | $7.1 \times 10^1$    | $8.2 \times 10^1$    | $1.9 \times 10^1$    | $1.9 \times 10^1$    | $1.5 \times 10^1$    | $1.0 \times 10^1$    | $1.4 \times 10^1$    | $8.0 \times 10^0$    | $5.3 \times 10^0$    | $1.1 \times 10^1$    |
| Jordan           | $1.6 \times 10^2$      | $9.4 \times 10^0$    | $1.3 \times 10^0$    | $5.1 \times 10^0$    | $1.0 \times 10^1$    | $1.9 \times 10^0$    | $2.7 \times 10^0$    | $3.2 \times 10^0$    | $4.0 \times 10^{-1}$ | $4.4 \times 10^{-1}$ | $2.8 \times 10^{-1}$ | $3.0 \times 10^{-1}$ | $3.1 \times 10^{-1}$ | $2.2 \times 10^{-1}$ | $1.1 \times 10^{-1}$ | $3.9 \times 10^{-1}$ |
| Kazakhstan       | $6.8 \times 10^2$      | $6.4 \times 10^1$    | $5.3 \times 10^1$    | $3.0 \times 10^1$    | $1.0 \times 10^2$    | $1.8 \times 10^1$    | $5.0 \times 10^1$    | $3.3 \times 10^1$    | $1.5 \times 10^1$    | $2.0 \times 10^1$    | $9.9 \times 10^0$    | $7.5 \times 10^0$    | $6.0 \times 10^0$    | $4.2 \times 10^0$    | $8.0 \times 10^0$    | $1.0 \times 10^1$    |
| Kenya            | $1.5 \times 10^3$      | $1.0 \times 10^3$    | $2.9 \times 10^2$    | $1.3 \times 10^2$    | $3.8 \times 10^2$    | $7.7 \times 10^1$    | $1.3 \times 10^2$    | $1.1 \times 10^2$    | $7.0 \times 10^1$    | $3.3 \times 10^1$    | $2.1 \times 10^1$    | $1.3 \times 10^1$    | $2.0 \times 10^1$    | $1.2 \times 10^1$    | $7.8 \times 10^0$    | $1.3 \times 10^1$    |
| Kiribati         | $1.2 \times 10^{-1}$   | $5.8 \times 10^{-2}$ | $2.4 \times 10^{-2}$ | $1.8 \times 10^{-2}$ | $4.3 \times 10^{-2}$ | $8.1 \times 10^{-3}$ | $2.1 \times 10^{-2}$ | $1.6 \times 10^{-2}$ | $5.3 \times 10^{-3}$ | $3.8 \times 10^{-3}$ | $3.0 \times 10^{-3}$ | $2.7 \times 10^{-3}$ | $3.1 \times 10^{-3}$ | $2.0 \times 10^{-3}$ | $7.3 \times 10^{-4}$ | $1.7 \times 10^{-3}$ |
| North Korea      | $5.6 \times 10^2$      | $3.0 \times 10^2$    | $1.6 \times 10^2$    | $6.3 \times 10^1$    | $2.1 \times 10^2$    | $3.3 \times 10^1$    | $7.1 \times 10^1$    | $4.8 \times 10^1$    | $3.2 \times 10^1$    | $3.8 \times 10^1$    | $1.8 \times 10^1$    | $1.5 \times 10^1$    | $1.3 \times 10^1$    | $1.0 \times 10^1$    | $1.7 \times 10^1$    | $2.0 \times 10^1$    |
| South Korea      | $6.8 \times 10^2$      | $6.4 \times 10^1$    | $1.5 \times 10^1$    | $2.6 \times 10^1$    | $6.2 \times 10^1$    | $1.7 \times 10^1$    | $2.3 \times 10^1$    | $2.6 \times 10^1$    | $5.6 \times 10^0$    | $4.9 \times 10^0$    | $4.8 \times 10^0$    | $3.0 \times 10^0$    | $4.2 \times 10^0$    | $2.7 \times 10^0$    | $1.2 \times 10^0$    | $3.9 \times 10^0$    |
| Kuwait           | $5.4 \times 10^1$      | $1.0 \times 10^1$    | $7.6 \times 10^0$    | $1.0 \times 10^1$    | $2.2 \times 10^1$    | $3.6 \times 10^0$    | $1.1 \times 10^1$    | $7.4 \times 10^0$    | $1.6 \times 10^0$    | $1.7 \times 10^0$    | $1.5 \times 10^0$    | $1.5 \times 10^0$    | $1.5 \times 10^0$    | $1.0 \times 10^0$    | $3.2 \times 10^{-1}$ | $8.7 \times 10^{-1}$ |
| Kyrgyzstan       | $7.8 \times 10^1$      | $5.3 \times 10^0$    | $2.3 \times 10^0$    | $2.1 \times 10^0$    | $7.5 \times 10^0$    | $1.2 \times 10^0$    | $3.0 \times 10^0$    | $2.2 \times 10^0$    | $7.0 \times 10^{-1}$ | $7.4 \times 10^{-1}$ | $4.5 \times 10^{-1}$ | $2.8 \times 10^{-1}$ | $2.5 \times 10^{-1}$ | $1.1 \times 10^{-1}$ | $2.1 \times 10^{-1}$ | $3.8 \times 10^{-1}$ |
| Laos             | $7.4 \times 10^2$      | $3.3 \times 10^2$    | $1.4 \times 10^2$    | $6.1 \times 10^1$    | $1.8 \times 10^2$    | $3.4 \times 10^1$    | $9.5 \times 10^1$    | $7.2 \times 10^1$    | $2.4 \times 10^1$    | $1.5 \times 10^1$    | $8.5 \times 10^0$    | $9.3 \times 10^0$    | $1.1 \times 10^1$    | $1.4 \times 10^1$    | $7.8 \times 10^0$    | $6.2 \times 10^0$    |
| Latvia           | $1.6 \times 10^2$      | $4.4 \times 10^1$    | $2.1 \times 10^1$    | $2.0 \times 10^1$    | $4.8 \times 10^1$    | $8.8 \times 10^0$    | $2.3 \times 10^1$    | $1.6 \times 10^1$    | $4.4 \times 10^0$    | $4.1 \times 10^0$    | $3.1 \times 10^0$    | $3.1 \times 10^0$    | $3.1 \times 10^0$    | $2.0 \times 10^0$    | $8.9 \times 10^{-1}$ | $2.0 \times 10^0$    |
| Lebanon          | $6.7 \times 10^1$      | $6.5 \times 10^0$    | $1.7 \times 10^0$    | $2.1 \times 10^0$    | $5.2 \times 10^0$    | $8.7 \times 10^{-1}$ | $1.6 \times 10^0$    | $1.6 \times 10^0$    | $4.6 \times 10^{-1}$ | $3.6 \times 10^{-1}$ | $2.3 \times 10^{-1}$ | $1.6 \times 10^{-1}$ | $1.9 \times 10^{-1}$ | $1.1 \times 10^{-1}$ | $9.3 \times 10^{-2}$ | $2.1 \times 10^{-1}$ |
| Lesotho          | $1.2 \times 10^2$      | $8.8 \times 10^1$    | $2.6 \times 10^1$    | $1.0 \times 10^1$    | $3.2 \times 10^1$    | $6.4 \times 10^0$    | $1.1 \times 10^1$    | $9.7 \times 10^0$    | $6.0 \times 10^0$    | $2.8 \times 10^0$    | $1.8 \times 10^0$    | $1.1 \times 10^0$    | $1.7 \times 10^0$    | $1.1 \times 10^0$    | $7.0 \times 10^{-1}$ | $1.1 \times 10^0$    |
| Liberia          | $3.4 \times 10^2$      | $2.6 \times 10^2$    | $7.4 \times 10^1$    | $2.9 \times 10^1$    | $9.0 \times 10^1$    | $1.8 \times 10^1$    | $2.9 \times 10^1$    | $2.7 \times 10^1$    | $1.8 \times 10^1$    | $8.0 \times 10^0$    | $5.0 \times 10^0$    | $2.7 \times 10^0$    | $4.7 \times 10^0$    | $2.7 \times 10^0$    | $1.9 \times 10^0$    | $3.0 \times 10^0$    |
| Libya            | $1.8 \times 10^2$      | $3.4 \times 10^1$    | $9.4 \times 10^0$    | $6.9 \times 10^0$    | $1.6 \times 10^1$    | $3.4 \times 10^0$    | $5.2 \times 10^0$    | $5.1 \times 10^0$    | $2.2 \times 10^0$    | $1.2 \times 10^0$    | $8.5 \times 10^{-1}$ | $5.5 \times 10^{-1}$ | $7.5 \times 10^{-1}$ | $4.9 \times 10^{-1}$ | $3.6 \times 10^{-1}$ | $6.6 \times 10^{-1}$ |
| Liechtenstein    | $5.6 \times 10^{-2}$   | $2.2 \times 10^{-2}$ | $1.0 \times 10^{-2}$ | $1.2 \times 10^{-2}$ | $2.6 \times 10^{-2}$ | $4.9 \times 10^{-3}$ | $1.3 \times 10^{-2}$ | $9.5 \times 10^{-3}$ | $2.5 \times 10^{-3}$ | $2.3 \times 10^{-3}$ | $1.8 \times 10^{-3}$ | $1.7 \times 10^{-3}$ | $1.9 \times 10^{-3}$ | $1.2 \times 10^{-3}$ | $3.8 \times 10^{-4}$ | $1.1 \times 10^{-3}$ |
| Lithuania        | $1.4 \times 10^2$      | $4.2 \times 10^1$    | $1.6 \times 10^1$    | $1.1 \times 10^1$    | $3.0 \times 10^1$    | $5.6 \times 10^0$    | $1.2 \times 10^1$    | $8.9 \times 10^0$    | $3.5 \times 10^0$    | $2.9 \times 10^0$    | $1.9 \times 10^0$    | $1.6 \times 10^0$    | $1.7 \times 10^0$    | $1.1 \times 10^0$    | $8.4 \times 10^{-1}$ | $1.4 \times 10^0$    |
| Luxembourg       | $1.0 \times 10^1$      | $1.1 \times 10^0$    | $5.8 \times 10^{-1}$ | $5.2 \times 10^{-1}$ | $1.2 \times 10^0$    | $5.9 \times 10^{-1}$ | $8.0 \times 10^{-1}$ | $5.9 \times 10^{-1}$ | $1.2 \times 10^{-1}$ | $1.2 \times 10^{-1}$ | $1.9 \times 10^{-1}$ | $8.4 \times 10^{-2}$ | $9.8 \times 10^{-2}$ | $1.0 \times 10^{-1}$ | $2.9 \times 10^{-2}$ | $1.2 \times 10^{-1}$ |
| Macedonia        | $5.4 \times 10^1$      | $1.9 \times 10^1$    | $6.2 \times 10^0$    | $3.3 \times 10^0$    | $9.9 \times 10^0$    | $1.9 \times 10^0$    | $3.7 \times 10^0$    | $3.0 \times 10^0$    | $1.3 \times 10^0$    | $9.0 \times 10^{-1}$ | $5.4 \times 10^{-1}$ | $4.3 \times 10^{-1}$ | $5.2 \times 10^{-1}$ | $4.0 \times 10^{-1}$ | $3.1 \times 10^{-1}$ | $4.4 \times 10^{-1}$ |
| Madagascar       | $1.1 \times 10^3$      | $6.3 \times 10^2$    | $2.2 \times 10^2$    | $9.4 \times 10^1$    | $2.8 \times 10^2$    | $5.4 \times 10^1$    | $1.3 \times 10^2$    | $1.0 \times 10^2$    | $4.4 \times 10^1$    | $2.4 \times 10^1$    | $1.4 \times 10^1$    | $1.3 \times 10^1$    | $1.6 \times 10^1$    | $1.7 \times 10^1$    | $1.0 \times 10^1$    | $9.8 \times 10^0$    |
| Malawi           | $3.3 \times 10^2$      | $2.3 \times 10^2$    | $7.0 \times 10^1$    | $2.8 \times 10^1$    | $8.9 \times 10^1$    | $1.8 \times 10^1$    | $3.2 \times 10^1$    | $2.8 \times 10^1$    | $1.6 \times 10^1$    | $7.8 \times 10^0$    | $4.7 \times 10^0$    | $3.3 \times 10^0$    | $4.6 \times 10^0$    | $3.4 \times 10^0$    | $2.2 \times 10^0$    | $2.9 \times 10^0$    |
| Malaysia         | $9.9 \times 10^2$      | $1.8 \times 10^2$    | $5.9 \times 10^1$    | $4.6 \times 10^1$    | $1.1 \times 10^2$    | $2.1 \times 10^1$    | $4.7 \times 10^1$    | $4.1 \times 10^1$    | $1.2 \times 10^1$    | $8.1 \times 10^0$    | $5.8 \times 10^0$    | $5.0 \times 10^0$    | $6.3 \times 10^0$    | $5.6 \times 10^0$    | $2.6 \times 10^0$    | $4.5 \times 10^0$    |
| Maldives         | $2.5 \times 10^1$      | $1.8 \times 10^1$    | $5.2 \times 10^0$    | $2.3 \times 10^0$    | $6.9 \times 10^0$    | $1.4 \times 10^0$    | $2.4 \times 10^0$    | $2.1 \times 10^0$    | $1.2 \times 10^0$    | $6.1 \times 10^{-1}$ | $3.9 \times 10^{-1}$ | $2.5 \times 10^{-1}$ | $3.7 \times 10^{-1}$ | $2.2 \times 10^{-1}$ | $1.4 \times 10^{-1}$ | $2.4 \times 10^{-1}$ |
| Mali             | $3.3 \times 10^2$      | $2.2 \times 10^2$    | $6.9 \times 10^1$    | $2.7 \times 10^1$    | $8.5 \times 10^1$    | $1.7 \times 10^1$    | $3.1 \times 10^1$    | $2.7 \times 10^1$    | $1.5 \times 10^1$    | $7.4 \times 10^0$    | $4.4 \times 10^0$    | $3.0 \times 10^0$    | $4.4 \times 10^0$    | $3.6 \times 10^0$    | $2.3 \times 10^0$    | $2.9 \times 10^0$    |
| Malta            | $1.0 \times 10^1$      | $5.1 \times 10^0$    | $1.5 \times 10^0$    | $7.2 \times 10^{-1}$ | $2.2 \times 10^0$    | $4.7 \times 10^{-1}$ | $8.1 \times 10^{-1}$ | $6.6 \times 10^{-1}$ | $3.5 \times 10^{-1}$ | $2.0 \times 10^{-1}$ | $1.2 \times 10^{-1}$ | $9.1 \times 10^{-2}$ | $1.2 \times 10^{-1}$ | $6.4 \times 10^{-2}$ | $4.9 \times 10^{-2}$ | $8.1 \times 10^{-2}$ |
| Marshall Islands | $1.3 \times 10^{-1}</$ |                      |                      |                      |                      |                      |                      |                      |                      |                      |                      |                      |                      |                      |                      |                      |

|                          |                      |                      |                      |                      |                      |                      |                      |                      |                      |                      |                      |                      |                      |                      |                      |                      |
|--------------------------|----------------------|----------------------|----------------------|----------------------|----------------------|----------------------|----------------------|----------------------|----------------------|----------------------|----------------------|----------------------|----------------------|----------------------|----------------------|----------------------|
| Mongolia                 | $1.4 \times 10^2$    | $2.8 \times 10^1$    | $2.2 \times 10^1$    | $1.0 \times 10^1$    | $2.9 \times 10^1$    | $4.9 \times 10^0$    | $1.6 \times 10^1$    | $1.1 \times 10^1$    | $3.0 \times 10^0$    | $4.0 \times 10^0$    | $1.6 \times 10^0$    | $2.2 \times 10^0$    | $1.7 \times 10^0$    | $3.0 \times 10^0$    | $2.7 \times 10^0$    | $2.1 \times 10^0$    |
| Montserrat               | $3.6 \times 10^{-5}$ | $1.5 \times 10^{-5}$ | $1.2 \times 10^{-5}$ | $1.5 \times 10^{-6}$ | $4.2 \times 10^{-5}$ | $6.3 \times 10^{-6}$ | $1.8 \times 10^{-5}$ | $1.8 \times 10^{-5}$ | $1.8 \times 10^{-6}$ | $3.4 \times 10^{-6}$ | $6.8 \times 10^{-7}$ | $4.3 \times 10^{-6}$ | $5.6 \times 10^{-7}$ | 0                    | 0                    | 0                    |
| Morocco                  | $5.2 \times 10^2$    | $5.4 \times 10^1$    | $1.9 \times 10^1$    | $2.6 \times 10^1$    | $5.9 \times 10^1$    | $1.0 \times 10^1$    | $2.3 \times 10^1$    | $1.9 \times 10^1$    | $4.5 \times 10^0$    | $4.3 \times 10^0$    | $3.2 \times 10^0$    | $2.8 \times 10^0$    | $2.8 \times 10^0$    | $1.8 \times 10^0$    | $1.1 \times 10^0$    | $2.5 \times 10^0$    |
| Mozambique               | $2.2 \times 10^3$    | $9.2 \times 10^2$    | $4.0 \times 10^2$    | $1.7 \times 10^2$    | $5.4 \times 10^2$    | $9.2 \times 10^1$    | $2.7 \times 10^2$    | $2.0 \times 10^2$    | $6.5 \times 10^1$    | $4.3 \times 10^1$    | $2.4 \times 10^1$    | $2.5 \times 10^1$    | $2.6 \times 10^1$    | $4.6 \times 10^1$    | $2.7 \times 10^1$    | $2.1 \times 10^1$    |
| Myanmar (Burma)          | $3.5 \times 10^3$    | $1.7 \times 10^3$    | $6.5 \times 10^2$    | $2.7 \times 10^2$    | $8.3 \times 10^2$    | $1.6 \times 10^2$    | $4.0 \times 10^2$    | $3.1 \times 10^2$    | $1.2 \times 10^2$    | $6.9 \times 10^1$    | $3.8 \times 10^1$    | $3.8 \times 10^1$    | $4.5 \times 10^1$    | $5.5 \times 10^1$    | $3.4 \times 10^1$    | $2.8 \times 10^1$    |
| Namibia                  | $1.1 \times 10^2$    | $2.5 \times 10^1$    | $9.5 \times 10^0$    | $5.9 \times 10^0$    | $1.5 \times 10^1$    | $3.1 \times 10^0$    | $6.3 \times 10^0$    | $5.3 \times 10^0$    | $1.7 \times 10^0$    | $1.1 \times 10^0$    | $6.5 \times 10^{-1}$ | $6.5 \times 10^{-1}$ | $7.1 \times 10^{-1}$ | $8.1 \times 10^{-1}$ | $4.6 \times 10^{-1}$ | $5.2 \times 10^{-1}$ |
| Nauru                    | 0                    | 0                    | 0                    | 0                    | 0                    | 0                    | 0                    | 0                    | 0                    | 0                    | 0                    | 0                    | 0                    | 0                    | 0                    | 0                    |
| Nepal                    | $1.2 \times 10^3$    | $6.1 \times 10^2$    | $2.2 \times 10^2$    | $1.3 \times 10^2$    | $3.4 \times 10^2$    | $6.8 \times 10^1$    | $1.7 \times 10^2$    | $1.3 \times 10^2$    | $5.0 \times 10^1$    | $3.1 \times 10^1$    | $2.2 \times 10^1$    | $1.9 \times 10^1$    | $2.4 \times 10^1$    | $1.4 \times 10^1$    | $6.6 \times 10^0$    | $1.3 \times 10^1$    |
| Netherlands              | $1.1 \times 10^2$    | $2.1 \times 10^1$    | $8.2 \times 10^0$    | $9.1 \times 10^0$    | $2.9 \times 10^1$    | $4.9 \times 10^0$    | $1.2 \times 10^1$    | $8.9 \times 10^0$    | $2.5 \times 10^0$    | $3.0 \times 10^0$    | $2.7 \times 10^0$    | $1.5 \times 10^0$    | $1.7 \times 10^0$    | $1.5 \times 10^0$    | $5.5 \times 10^{-1}$ | $2.4 \times 10^0$    |
| Netherlands Antilles     | $9.9 \times 10^0$    | $2.3 \times 10^0$    | $6.4 \times 10^{-1}$ | $4.2 \times 10^{-1}$ | $2.2 \times 10^0$    | $2.0 \times 10^{-1}$ | $3.3 \times 10^{-1}$ | $3.6 \times 10^{-1}$ | $1.5 \times 10^{-1}$ | $7.6 \times 10^{-2}$ | $5.0 \times 10^{-2}$ | $3.1 \times 10^{-2}$ | $4.8 \times 10^{-2}$ | $2.9 \times 10^{-2}$ | $2.2 \times 10^{-2}$ | $3.7 \times 10^{-2}$ |
| New Caledonia            | $4.8 \times 10^{-1}$ | $2.8 \times 10^{-1}$ | $9.3 \times 10^{-2}$ | $5.9 \times 10^{-2}$ | $1.6 \times 10^{-1}$ | $3.1 \times 10^{-2}$ | $6.4 \times 10^{-2}$ | $5.1 \times 10^{-2}$ | $2.2 \times 10^{-2}$ | $1.4 \times 10^{-2}$ | $1.0 \times 10^{-2}$ | $7.8 \times 10^{-3}$ | $9.6 \times 10^{-3}$ | $6.2 \times 10^{-3}$ | $2.8 \times 10^{-3}$ | $6.0 \times 10^{-3}$ |
| New Zealand              | $1.1 \times 10^2$    | $3.5 \times 10^1$    | $1.4 \times 10^1$    | $6.9 \times 10^0$    | $2.8 \times 10^1$    | $3.8 \times 10^0$    | $9.2 \times 10^0$    | $6.3 \times 10^0$    | $2.9 \times 10^0$    | $3.2 \times 10^0$    | $2.5 \times 10^0$    | $1.2 \times 10^0$    | $1.3 \times 10^0$    | $1.5 \times 10^0$    | $9.4 \times 10^{-1}$ | $2.5 \times 10^0$    |
| Nicaragua                | $3.6 \times 10^2$    | $2.3 \times 10^2$    | $6.6 \times 10^1$    | $4.8 \times 10^1$    | $8.5 \times 10^1$    | $1.7 \times 10^1$    | $2.8 \times 10^1$    | $2.6 \times 10^1$    | $1.6 \times 10^1$    | $7.4 \times 10^0$    | $4.6 \times 10^0$    | $2.8 \times 10^0$    | $4.5 \times 10^0$    | $2.7 \times 10^0$    | $1.8 \times 10^0$    | $2.9 \times 10^0$    |
| Niger                    | $5.1 \times 10^2$    | $3.9 \times 10^2$    | $1.1 \times 10^2$    | $4.3 \times 10^1$    | $1.3 \times 10^2$    | $2.7 \times 10^1$    | $4.4 \times 10^1$    | $4.0 \times 10^1$    | $2.6 \times 10^1$    | $1.2 \times 10^1$    | $7.4 \times 10^0$    | $4.2 \times 10^0$    | $7.0 \times 10^0$    | $4.0 \times 10^0$    | $2.8 \times 10^0$    | $4.5 \times 10^0$    |
| Nigeria                  | $7.8 \times 10^3$    | $3.4 \times 10^3$    | $1.3 \times 10^3$    | $8.8 \times 10^2$    | $2.2 \times 10^3$    | $4.2 \times 10^2$    | $1.1 \times 10^3$    | $8.4 \times 10^2$    | $2.9 \times 10^2$    | $2.0 \times 10^2$    | $1.5 \times 10^2$    | $1.3 \times 10^2$    | $1.6 \times 10^2$    | $1.0 \times 10^2$    | $4.0 \times 10^1$    | $8.9 \times 10^1$    |
| Niue                     | $2.8 \times 10^{-4}$ | $1.4 \times 10^{-4}$ | $5.6 \times 10^{-5}$ | $4.3 \times 10^{-5}$ | $1.0 \times 10^{-4}$ | $1.9 \times 10^{-5}$ | $4.9 \times 10^{-5}$ | $3.7 \times 10^{-5}$ | $1.2 \times 10^{-5}$ | $8.9 \times 10^{-6}$ | $6.9 \times 10^{-6}$ | $6.3 \times 10^{-6}$ | $7.3 \times 10^{-6}$ | $4.7 \times 10^{-6}$ | $1.7 \times 10^{-6}$ | $4.1 \times 10^{-6}$ |
| Northern Mariana Islands | $1.4 \times 10^{-1}$ | $7.0 \times 10^{-2}$ | $2.9 \times 10^{-2}$ | $2.2 \times 10^{-2}$ | $5.2 \times 10^{-2}$ | $9.7 \times 10^{-3}$ | $2.6 \times 10^{-2}$ | $1.9 \times 10^{-2}$ | $6.4 \times 10^{-3}$ | $4.6 \times 10^{-3}$ | $3.6 \times 10^{-3}$ | $3.2 \times 10^{-3}$ | $3.8 \times 10^{-3}$ | $2.4 \times 10^{-3}$ | $8.8 \times 10^{-4}$ | $2.1 \times 10^{-3}$ |
| Norway                   | $1.1 \times 10^2$    | $6.0 \times 10^1$    | $2.1 \times 10^1$    | $1.2 \times 10^1$    | $6.4 \times 10^1$    | $7.6 \times 10^0$    | $3.9 \times 10^1$    | $3.1 \times 10^1$    | $1.1 \times 10^1$    | $3.1 \times 10^1$    | $2.0 \times 10^1$    | $5.8 \times 10^0$    | $1.0 \times 10^1$    | $8.2 \times 10^0$    | $1.9 \times 10^0$    | $9.0 \times 10^0$    |
| Oman                     | $7.4 \times 10^1$    | $1.1 \times 10^1$    | $8.3 \times 10^0$    | $1.2 \times 10^1$    | $2.4 \times 10^1$    | $4.1 \times 10^0$    | $1.2 \times 10^1$    | $8.4 \times 10^0$    | $1.7 \times 10^0$    | $1.9 \times 10^0$    | $1.6 \times 10^0$    | $1.7 \times 10^0$    | $1.7 \times 10^0$    | $1.2 \times 10^0$    | $3.4 \times 10^{-1}$ | $9.8 \times 10^{-1}$ |
| Pakistan                 | $4.4 \times 10^3$    | $1.6 \times 10^3$    | $6.2 \times 10^2$    | $4.8 \times 10^2$    | $1.2 \times 10^3$    | $2.4 \times 10^2$    | $6.3 \times 10^2$    | $4.5 \times 10^2$    | $1.5 \times 10^2$    | $1.1 \times 10^2$    | $7.8 \times 10^1$    | $7.0 \times 10^1$    | $7.9 \times 10^1$    | $4.7 \times 10^1$    | $2.4 \times 10^1$    | $5.1 \times 10^1$    |
| Palau                    | $4.1 \times 10^{-2}$ | $2.0 \times 10^{-2}$ | $8.2 \times 10^{-3}$ | $6.2 \times 10^{-3}$ | $1.5 \times 10^{-2}$ | $2.9 \times 10^{-3}$ | $7.9 \times 10^{-3}$ | $5.5 \times 10^{-3}$ | $1.8 \times 10^{-3}$ | $1.3 \times 10^{-3}$ | $1.0 \times 10^{-3}$ | $1.0 \times 10^{-3}$ | $1.1 \times 10^{-3}$ | $7.0 \times 10^{-4}$ | $2.6 \times 10^{-4}$ | $6.0 \times 10^{-4}$ |
| Panama                   | $9.1 \times 10^1$    | $4.6 \times 10^1$    | $1.3 \times 10^1$    | $6.2 \times 10^0$    | $1.8 \times 10^1$    | $3.6 \times 10^0$    | $6.3 \times 10^0$    | $5.7 \times 10^0$    | $3.2 \times 10^0$    | $1.5 \times 10^0$    | $9.9 \times 10^{-1}$ | $6.4 \times 10^{-1}$ | $9.8 \times 10^{-1}$ | $6.1 \times 10^{-1}$ | $3.9 \times 10^{-1}$ | $6.4 \times 10^{-1}$ |
| Papua New Guinea         | $3.1 \times 10^2$    | $2.3 \times 10^2$    | $6.7 \times 10^1$    | $2.6 \times 10^1$    | $8.2 \times 10^1$    | $1.7 \times 10^1$    | $2.7 \times 10^1$    | $2.5 \times 10^1$    | $1.6 \times 10^1$    | $7.2 \times 10^0$    | $4.5 \times 10^0$    | $2.6 \times 10^0$    | $4.3 \times 10^0$    | $2.7 \times 10^0$    | $1.8 \times 10^0$    | $2.8 \times 10^0$    |
| Paraguay                 | $8.9 \times 10^2$    | $2.7 \times 10^2$    | $1.4 \times 10^2$    | $5.9 \times 10^1$    | $1.8 \times 10^2$    | $3.1 \times 10^1$    | $1.0 \times 10^2$    | $7.6 \times 10^1$    | $2.0 \times 10^1$    | $1.4 \times 10^1$    | $6.1 \times 10^0$    | $9.5 \times 10^0$    | $8.5 \times 10^0$    | $1.8 \times 10^1$    | $1.1 \times 10^1$    | $5.9 \times 10^0$    |
| Peru                     | $7.9 \times 10^2$    | $3.3 \times 10^2$    | $1.1 \times 10^2$    | $5.4 \times 10^1$    | $1.5 \times 10^2$    | $2.9 \times 10^1$    | $6.0 \times 10^1$    | $5.1 \times 10^1$    | $2.3 \times 10^1$    | $1.3 \times 10^1$    | $8.1 \times 10^0$    | $6.2 \times 10^0$    | $8.4 \times 10^0$    | $6.6 \times 10^0$    | $3.8 \times 10^0$    | $5.5 \times 10^0$    |
| Philippines              | $1.6 \times 10^3$    | $5.5 \times 10^2$    | $1.6 \times 10^2$    | $9.1 \times 10^1$    | $2.5 \times 10^2$    | $4.9 \times 10^1$    | $8.8 \times 10^1$    | $8.1 \times 10^1$    | $3.7 \times 10^1$    | $2.0 \times 10^1$    | $1.3 \times 10^1$    | $9.1 \times 10^0$    | $1.3 \times 10^1$    | $7.9 \times 10^0$    | $4.6 \times 10^0$    | $9.0 \times 10^0$    |
| Pitcairn Islands         | 0                    | 0                    | 0                    | 0                    | 0                    | 0                    | 0                    | 0                    | 0                    | 0                    | 0                    | 0                    | 0                    | 0                    | 0                    | 0                    |
| Poland                   | $1.3 \times 10^3$    | $3.0 \times 10^2$    | $2.1 \times 10^2$    | $1.5 \times 10^2$    | $3.7 \times 10^2$    | $6.9 \times 10^1$    | $1.5 \times 10^2$    | $1.2 \times 10^2$    | $4.6 \times 10^1$    | $6.6 \times 10^1$    | $3.6 \times 10^1$    | $3.2 \times 10^1$    | $2.9 \times 10^1$    | $2.1 \times 10^1$    | $2.6 \times 10^1$    | $3.5 \times 10^1$    |
| Portugal                 | $2.0 \times 10^2$    | $3.3 \times 10^1$    | $1.7 \times 10^1$    | $1.8 \times 10^1$    | $4.0 \times 10^1$    | $7.6 \times 10^0$    | $2.1 \times 10^1$    | $1.4 \times 10^1$    | $3.4 \times 10^0$    | $3.2 \times 10^0$    | $2.6 \times 10^0$    | $2.7 \times 10^0$    | $2.7 \times 10^0$    | $1.9 \times 10^0$    | $7.0 \times 10^{-1}$ | $1.6 \times 10^0$    |
| Puerto Rico              | $1.2 \times 10^1$    | $5.9 \times 10^0$    | $2.3 \times 10^0$    | $1.7 \times 10^0$    | $4.3 \times 10^0$    | $8.3 \times 10^{-1}$ | $1.8 \times 10^0$    | $1.4 \times 10^0$    | $5.1 \times 10^{-1}$ | $3.7 \times 10^{-1}$ | $2.8 \times 10^{-1}$ | $2.3 \times 10^{-1}$ | $2.6 \times 10^{-1}$ | $1.7 \times 10^{-1}$ | $7.3 \times 10^{-2}$ | $1.6 \times 10^{-1}$ |
| Qatar                    | $8.6 \times 10^0$    | $1.6 \times 10^0$    | $1.9 \times 10^{-1}$ | $2.7 \times 10^{-1}$ | $1.8 \times 10^0$    | $3.2 \times 10^{-1}$ | $2.6 \times 10^{-1}$ | $2.8 \times 10^{-1}$ | $4.3 \times 10^{-2}$ | $4.7 \times 10^{-2}$ | $1.2 \times 10^{-1}$ | $3.0 \times 10^{-2}$ | $4.6 \times 10^{-2}$ | $1.0 \times 10^{-1}$ | $3.7 \times 10^{-2}$ | $1.1 \times 10^{-1}$ |
| Reunion                  | $1.7 \times 10^{-2}$ | $5.2 \times 10^{-3}$ | $3.9 \times 10^{-3}$ | $2.3 \times 10^{-3}$ | $1.2 \times 10^{-2}$ | $2.0 \times 10^{-3}$ | $5.5 \times 10^{-3}$ | $4.9 \times 10^{-3}$ | $6.8 \times 10^{-4}$ | $1.0 \times 10^{-3}$ | $4.5 \times 10^{-4}$ | $1.1 \times 10^{-3}$ | $4.0 \times 10^{-4}$ | $2.1 \times 10^{-4}$ | $6.9 \times 10^{-5}$ | $1.8 \times 10^{-4}$ |
| Romania                  | $6.2 \times 10^2$    | $1.7 \times 10^2$    | $6.3 \times 10^1$    | $5.7 \times 10^1$    | $1.5 \times 10^2$    | $2.7 \times 10^1$    | $6.3 \times 10^1$    | $4.7 \times 10^1$    | $1.5 \times 10^1$    | $1.3 \times 10^1$    | $1.1 \times 10^1$    | $7.8 \times 10^0$    | $8.8 \times 10^0$    | $6.5 \times 10^0$    | $2.6 \times 10^0$    | $8.0 \times 10^0$    |
| Russia                   | $4.5 \times 10^3$    | $6.5 \times 10^2$    | $4.0 \times 10^2$    | $2.4 \times 10^2$    | $7.1 \times 10^2$    | $1.4 \times 10^2$    | $4.7 \times 10^2$    | $4.3 \times 10^2$    | $1.2 \times 10^2$    | $3.2 \times 10^2$    | $1.9 \times 10^2$    | $7.5 \times 10^1$    | $1.1 \times 10^2$    | $9.7 \times 10^1$    | $4.9 \times 10^1$    | $8.5 \times 10^1$    |
| Rwanda                   | $5.2 \times 10^2$    | $4.0 \times 10^2$    | $1.1 \times 10^2$    | $4.3 \times 10^1$    | $1.4 \times 10^2$    | $2.8 \times 10^1$    | $4.4 \times 10^1$    | $4.0 \times 10^1$    | $2.7 \times 10^1$    | $1.2 \times 10^1$    | $7.6 \times 10^0$    | $4.2 \times 10^0$    | $7.1 \times 10^0$    | $4.0 \times 10^0$    | $2.9 \times 10^0$    | $4.6 \times 10^0$    |
| Samoa                    | $3.9 \times 10^0$    | $2.9 \times 10^0$    | $8.5 \times 10^{-1}$ | $3.5 \times 10^{-1}$ | $1.1 \times 10^0$    | $2.2 \times 10^{-1}$ | $3.6 \times 10^{-1}$ | $3.2 \times 10^{-1}$ | $2.0 \times 10^{-1}$ | $9.5 \times 10^{-2}$ | $6.1 \times 10^{-2}$ | $3.6 \times 10^{-2}$ | $5.8 \times 10^{-2}$ | $3.4 \times 10^{-2}$ | $2.2 \times 10^{-2}$ | $3.7 \times 10^{-2}$ |
| San Marino               | $1.8 \times 10^{-1}$ | $7.4 \times 10^{-2}$ | $3.8 \times 10^{-2}$ | $3.9 \times 10^{-2}$ | $8.8 \times 10^{-2}$ | $1.6 \times 10^{-2}$ | $4.3 \times 10^{-2}$ | $3.0 \times 10^{-2}$ | $8.0 \times 10^{-3}$ | $7.3 \times 10^{-3}$ | $5.9 \times 10^{-3}$ | $5.7 \times 10^{-3}$ | $6.0 \times 10^{-3}$ | $4.1 \times 10^{-3}$ | $1.4 \times 10^{-3}$ | $3.5 \times 10^{-3}$ |
| Sao Tome and Principe    | $6.5 \times 10^1$    | $5.0 \times 10^1$    | $1.4 \times 10^1$    | $5.5 \times 10^0$    | $1.7 \times 10^1$    | $3.5 \times 10^0$    | $5.5 \times 10^0$    | $5.1 \times 10^0$    | $3.4 \times 10^0$    | $1.5 \times 10^0$    | $9.5 \times 10^{-1}$ | $5.2 \times 10^{-1}$ | $9.0 \times 10^{-1}$ | $5.1 \times 10^{-1}$ | $3.6 \times 10^{-1}$ | $5.8 \times 10^{-1}$ |
| Saudi Arabia             | $6.0 \times 10^2$    | $2.6 \times 10^1$    | $8.6 \times 10^0$    | $1.5 \times 10^1$    | $2.7 \times 10^1$    | $5.5 \times 10^0$    | $9.7 \times 10^0$    | $1.0 \times 10^1$    | $2.4 \times 10^0$    | $2.4 \times 10^0$    | $1.6 \times 10^0$    | $1.1 \times 10^0$    | $1.0 \times 10^0$    | $7.5 \times 10^{-1}$ | $7.4 \times 10^{-1}$ | $1.7 \times 10^0$    |
| Senegal                  | $2.2 \times 10^2$    | $9.5 \times 10^1$    | $3.0 \times 10^1$    | $1.3 \times 10^1$    | $4.0 \times 10^1$    | $8.2 \times 10^0$    | $1.5 \times 10^1$    | $1.3 \times 10^1$    | $6.3 \times 10^0$    | $3.2 \times 10^0$    | $1.9 \times 10^0$    | $1.4 \times 10^0$    | $1.9 \times 10^0$    | $1.8 \times 10^0$    | $1.2 \times 10^0$    | $1.3 \times 10^0$    |
| Serbia and Montenegro    | $2.6 \times 10^2$    | $1.2 \times 10^2$    | $5.2 \times 10^1$    | $2.2 \times 10^1$    | $7.1 \times 10^1$    | $1.3 \times 10^1$    | $2.5 \times 10^1$    | $1.9 \times 1$       |                      |                      |                      |                      |                      |                      |                      |                      |

|                                         |                      |                      |                      |                      |                      |                      |                      |                      |                      |                      |                      |                      |                      |                      |                      |                      |
|-----------------------------------------|----------------------|----------------------|----------------------|----------------------|----------------------|----------------------|----------------------|----------------------|----------------------|----------------------|----------------------|----------------------|----------------------|----------------------|----------------------|----------------------|
| Somalia                                 | $6.2 \times 10^2$    | $4.8 \times 10^2$    | $1.4 \times 10^2$    | $5.2 \times 10^1$    | $1.6 \times 10^2$    | $3.4 \times 10^1$    | $5.3 \times 10^1$    | $4.9 \times 10^1$    | $3.2 \times 10^1$    | $1.5 \times 10^1$    | $9.1 \times 10^0$    | $5.0 \times 10^0$    | $8.6 \times 10^0$    | $4.9 \times 10^0$    | $3.4 \times 10^0$    | $5.6 \times 10^0$    |
| South Africa                            | $2.4 \times 10^3$    | $7.3 \times 10^2$    | $3.5 \times 10^2$    | $2.1 \times 10^2$    | $6.0 \times 10^2$    | $1.0 \times 10^2$    | $2.3 \times 10^2$    | $1.7 \times 10^2$    | $7.3 \times 10^1$    | $7.9 \times 10^1$    | $4.8 \times 10^1$    | $3.7 \times 10^1$    | $3.6 \times 10^1$    | $3.1 \times 10^1$    | $3.0 \times 10^1$    | $4.6 \times 10^1$    |
| South Georgia and the South Sandwich Is | 0                    | 0                    | 0                    | 0                    | 0                    | 0                    | 0                    | 0                    | 0                    | 0                    | 0                    | 0                    | 0                    | 0                    | 0                    | 0                    |
| Spain                                   | $8.1 \times 10^2$    | $1.3 \times 10^2$    | $7.9 \times 10^1$    | $7.9 \times 10^1$    | $1.9 \times 10^2$    | $3.5 \times 10^1$    | $9.7 \times 10^1$    | $7.1 \times 10^1$    | $1.7 \times 10^1$    | $2.7 \times 10^1$    | $2.0 \times 10^1$    | $1.3 \times 10^1$    | $1.5 \times 10^1$    | $1.1 \times 10^1$    | $3.6 \times 10^0$    | $1.0 \times 10^1$    |
| Sri Lanka                               | $6.8 \times 10^2$    | $2.7 \times 10^2$    | $9.6 \times 10^1$    | $5.3 \times 10^1$    | $1.4 \times 10^2$    | $3.1 \times 10^1$    | $7.2 \times 10^1$    | $5.8 \times 10^1$    | $2.1 \times 10^1$    | $1.3 \times 10^1$    | $8.7 \times 10^0$    | $7.8 \times 10^0$    | $1.1 \times 10^1$    | $5.9 \times 10^0$    | $2.7 \times 10^0$    | $5.5 \times 10^0$    |
| St. Helena                              | 0                    | 0                    | 0                    | 0                    | 0                    | 0                    | 0                    | 0                    | 0                    | 0                    | 0                    | 0                    | 0                    | 0                    | 0                    | 0                    |
| St. Kitts and Nevis                     | $6.5 \times 10^{-2}$ | $3.0 \times 10^{-2}$ | $1.2 \times 10^{-2}$ | $8.9 \times 10^{-3}$ | $2.2 \times 10^{-2}$ | $4.5 \times 10^{-3}$ | $1.2 \times 10^{-2}$ | $8.3 \times 10^{-3}$ | $2.7 \times 10^{-3}$ | $2.0 \times 10^{-3}$ | $1.6 \times 10^{-3}$ | $1.5 \times 10^{-3}$ | $1.7 \times 10^{-3}$ | $1.0 \times 10^{-3}$ | $3.9 \times 10^{-4}$ | $8.8 \times 10^{-4}$ |
| St. Lucia                               | $2.8 \times 10^{-1}$ | $1.3 \times 10^{-1}$ | $5.3 \times 10^{-2}$ | $3.9 \times 10^{-2}$ | $9.5 \times 10^{-2}$ | $1.8 \times 10^{-2}$ | $4.7 \times 10^{-2}$ | $3.5 \times 10^{-2}$ | $1.2 \times 10^{-2}$ | $8.6 \times 10^{-3}$ | $6.7 \times 10^{-3}$ | $6.0 \times 10^{-3}$ | $7.0 \times 10^{-3}$ | $4.5 \times 10^{-3}$ | $1.6 \times 10^{-3}$ | $3.9 \times 10^{-3}$ |
| St. Pierre and Miquelon                 | 0                    | 0                    | 0                    | 0                    | 0                    | 0                    | 0                    | 0                    | 0                    | 0                    | 0                    | 0                    | 0                    | 0                    | 0                    | 0                    |
| St. Vincent and the Grenadines          | $2.4 \times 10^{-1}$ | $1.2 \times 10^{-1}$ | $4.6 \times 10^{-2}$ | $3.4 \times 10^{-2}$ | $8.6 \times 10^{-2}$ | $1.6 \times 10^{-2}$ | $3.6 \times 10^{-2}$ | $2.7 \times 10^{-2}$ | $1.0 \times 10^{-2}$ | $7.2 \times 10^{-3}$ | $5.5 \times 10^{-3}$ | $4.6 \times 10^{-3}$ | $5.0 \times 10^{-3}$ | $3.3 \times 10^{-3}$ | $1.4 \times 10^{-3}$ | $3.1 \times 10^{-3}$ |
| Sudan                                   | $1.7 \times 10^3$    | $7.5 \times 10^2$    | $2.8 \times 10^2$    | $1.2 \times 10^2$    | $3.6 \times 10^2$    | $6.7 \times 10^1$    | $1.6 \times 10^2$    | $1.3 \times 10^2$    | $5.1 \times 10^1$    | $2.9 \times 10^1$    | $1.5 \times 10^1$    | $1.5 \times 10^1$    | $1.7 \times 10^1$    | $2.5 \times 10^1$    | $1.5 \times 10^1$    | $1.2 \times 10^1$    |
| Suriname                                | $3.9 \times 10^0$    | $2.2 \times 10^0$    | $7.5 \times 10^{-1}$ | $3.1 \times 10^{-1}$ | $9.5 \times 10^{-1}$ | $1.8 \times 10^{-1}$ | $4.2 \times 10^{-1}$ | $3.4 \times 10^{-1}$ | $1.5 \times 10^{-1}$ | $8.3 \times 10^{-2}$ | $5.1 \times 10^{-2}$ | $4.1 \times 10^{-2}$ | $5.4 \times 10^{-2}$ | $5.5 \times 10^{-2}$ | $3.3 \times 10^{-2}$ | $3.4 \times 10^{-2}$ |
| Swaziland                               | $6.2 \times 10^1$    | $4.4 \times 10^1$    | $1.3 \times 10^1$    | $5.3 \times 10^0$    | $1.6 \times 10^1$    | $3.3 \times 10^0$    | $5.8 \times 10^0$    | $5.1 \times 10^0$    | $3.0 \times 10^0$    | $1.4 \times 10^0$    | $8.8 \times 10^{-1}$ | $5.6 \times 10^{-1}$ | $8.5 \times 10^{-1}$ | $6.1 \times 10^{-1}$ | $4.0 \times 10^{-1}$ | $5.5 \times 10^{-1}$ |
| Sweden                                  | $1.9 \times 10^2$    | $8.1 \times 10^1$    | $2.5 \times 10^1$    | $1.1 \times 10^1$    | $3.7 \times 10^1$    | $8.4 \times 10^0$    | $1.6 \times 10^1$    | $1.4 \times 10^1$    | $6.4 \times 10^0$    | $6.6 \times 10^0$    | $4.2 \times 10^0$    | $1.9 \times 10^0$    | $3.0 \times 10^0$    | $1.8 \times 10^0$    | $9.4 \times 10^{-1}$ | $2.2 \times 10^0$    |
| Switzerland                             | $8.2 \times 10^1$    | $3.6 \times 10^1$    | $1.2 \times 10^1$    | $5.7 \times 10^0$    | $1.7 \times 10^1$    | $3.7 \times 10^0$    | $6.8 \times 10^0$    | $5.3 \times 10^0$    | $2.6 \times 10^0$    | $1.8 \times 10^0$    | $1.1 \times 10^0$    | $8.9 \times 10^{-1}$ | $1.1 \times 10^0$    | $6.0 \times 10^{-1}$ | $4.8 \times 10^{-1}$ | $8.5 \times 10^{-1}$ |
| Syria                                   | $4.7 \times 10^2$    | $2.7 \times 10^1$    | $9.6 \times 10^0$    | $1.3 \times 10^1$    | $3.2 \times 10^1$    | $6.9 \times 10^0$    | $1.2 \times 10^1$    | $1.1 \times 10^1$    | $2.9 \times 10^0$    | $3.1 \times 10^0$    | $1.7 \times 10^0$    | $1.3 \times 10^0$    | $1.1 \times 10^0$    | $5.4 \times 10^{-1}$ | $9.0 \times 10^{-1}$ | $1.8 \times 10^0$    |
| Tajikistan                              | $3.3 \times 10^1$    | $7.0 \times 10^0$    | $6.4 \times 10^0$    | $3.0 \times 10^0$    | $2.1 \times 10^1$    | $1.5 \times 10^0$    | $7.1 \times 10^0$    | $3.1 \times 10^0$    | $1.5 \times 10^0$    | $3.6 \times 10^0$    | $2.8 \times 10^0$    | $1.1 \times 10^0$    | $9.7 \times 10^{-1}$ | $1.6 \times 10^0$    | $1.1 \times 10^0$    | $3.3 \times 10^0$    |
| Tanzania, United Republic of            | $2.0 \times 10^3$    | $1.1 \times 10^3$    | $3.7 \times 10^2$    | $1.8 \times 10^2$    | $5.1 \times 10^2$    | $9.7 \times 10^1$    | $2.2 \times 10^2$    | $1.8 \times 10^2$    | $7.7 \times 10^1$    | $4.3 \times 10^1$    | $2.7 \times 10^1$    | $2.3 \times 10^1$    | $2.9 \times 10^1$    | $2.7 \times 10^1$    | $1.5 \times 10^1$    | $1.8 \times 10^1$    |
| Thailand                                | $2.9 \times 10^3$    | $6.9 \times 10^2$    | $2.3 \times 10^2$    | $1.4 \times 10^2$    | $3.9 \times 10^2$    | $7.0 \times 10^1$    | $1.5 \times 10^2$    | $1.2 \times 10^2$    | $4.5 \times 10^1$    | $2.7 \times 10^1$    | $1.6 \times 10^1$    | $1.4 \times 10^1$    | $1.6 \times 10^1$    | $1.8 \times 10^1$    | $1.1 \times 10^1$    | $1.3 \times 10^1$    |
| Timor Leste                             | $1.7 \times 10^2$    | $1.1 \times 10^2$    | $3.5 \times 10^1$    | $1.6 \times 10^1$    | $4.6 \times 10^1$    | $9.4 \times 10^0$    | $1.8 \times 10^1$    | $1.5 \times 10^1$    | $8.2 \times 10^0$    | $4.2 \times 10^0$    | $2.8 \times 10^0$    | $1.9 \times 10^0$    | $2.9 \times 10^0$    | $1.7 \times 10^0$    | $9.4 \times 10^{-1}$ | $1.7 \times 10^0$    |
| Togo                                    | $2.0 \times 10^2$    | $1.2 \times 10^2$    | $3.6 \times 10^1$    | $1.5 \times 10^1$    | $4.6 \times 10^1$    | $9.1 \times 10^0$    | $1.6 \times 10^1$    | $1.4 \times 10^1$    | $8.3 \times 10^0$    | $3.9 \times 10^0$    | $2.4 \times 10^0$    | $1.5 \times 10^0$    | $2.3 \times 10^0$    | $1.7 \times 10^0$    | $1.1 \times 10^0$    | $1.5 \times 10^0$    |
| Tokelau                                 | 0                    | 0                    | 0                    | 0                    | 0                    | 0                    | 0                    | 0                    | 0                    | 0                    | 0                    | 0                    | 0                    | 0                    | 0                    | 0                    |
| Tonga                                   | $2.3 \times 10^0$    | $1.8 \times 10^0$    | $5.1 \times 10^{-1}$ | $2.0 \times 10^{-1}$ | $6.3 \times 10^{-1}$ | $1.3 \times 10^{-1}$ | $2.1 \times 10^{-1}$ | $1.9 \times 10^{-1}$ | $1.2 \times 10^{-1}$ | $5.6 \times 10^{-2}$ | $3.5 \times 10^{-2}$ | $2.0 \times 10^{-2}$ | $3.4 \times 10^{-2}$ | $1.9 \times 10^{-2}$ | $1.3 \times 10^{-2}$ | $2.2 \times 10^{-2}$ |
| Trinidad and Tobago                     | $3.4 \times 10^1$    | $4.3 \times 10^0$    | $1.1 \times 10^0$    | $1.2 \times 10^0$    | $3.0 \times 10^0$    | $5.5 \times 10^{-1}$ | $9.3 \times 10^{-1}$ | $9.4 \times 10^{-1}$ | $1.9 \times 10^{-1}$ | $1.7 \times 10^{-1}$ | $1.4 \times 10^{-1}$ | $1.2 \times 10^{-1}$ | $1.1 \times 10^{-1}$ | $1.3 \times 10^{-1}$ | $7.0 \times 10^{-2}$ | $1.4 \times 10^{-1}$ |
| Tunisia                                 | $3.0 \times 10^2$    | $1.0 \times 10^2$    | $3.3 \times 10^1$    | $2.5 \times 10^1$    | $6.1 \times 10^1$    | $1.1 \times 10^1$    | $2.4 \times 10^1$    | $1.9 \times 10^1$    | $7.7 \times 10^0$    | $4.8 \times 10^0$    | $3.5 \times 10^0$    | $2.8 \times 10^0$    | $3.4 \times 10^0$    | $2.2 \times 10^0$    | $1.0 \times 10^0$    | $2.3 \times 10^0$    |
| Turkey                                  | $2.2 \times 10^3$    | $4.3 \times 10^2$    | $2.8 \times 10^2$    | $2.1 \times 10^2$    | $5.5 \times 10^2$    | $9.8 \times 10^1$    | $2.4 \times 10^2$    | $1.7 \times 10^2$    | $5.9 \times 10^1$    | $7.0 \times 10^1$    | $4.5 \times 10^1$    | $3.8 \times 10^1$    | $3.5 \times 10^1$    | $2.5 \times 10^1$    | $2.4 \times 10^1$    | $3.8 \times 10^1$    |
| Turkmenistan                            | $1.2 \times 10^2$    | $6.6 \times 10^0$    | $2.9 \times 10^0$    | $3.7 \times 10^0$    | $1.1 \times 10^1$    | $2.0 \times 10^0$    | $5.9 \times 10^0$    | $4.0 \times 10^0$    | $1.7 \times 10^0$    | $2.0 \times 10^0$    | $9.2 \times 10^{-1}$ | $6.7 \times 10^{-1}$ | $4.7 \times 10^{-1}$ | $2.5 \times 10^{-1}$ | $6.6 \times 10^{-1}$ | $1.1 \times 10^0$    |
| Turks and Caicos Islands                | $2.1 \times 10^{-3}$ | $7.4 \times 10^{-4}$ | $1.9 \times 10^{-4}$ | $2.9 \times 10^{-4}$ | $7.5 \times 10^{-4}$ | $1.8 \times 10^{-4}$ | $3.4 \times 10^{-4}$ | $3.8 \times 10^{-4}$ | $9.2 \times 10^{-5}$ | $8.0 \times 10^{-5}$ | $5.4 \times 10^{-5}$ | $4.7 \times 10^{-5}$ | $6.6 \times 10^{-5}$ | $3.1 \times 10^{-5}$ | $7.5 \times 10^{-6}$ | $3.2 \times 10^{-5}$ |
| Tuvalu                                  | 0                    | 0                    | 0                    | 0                    | 0                    | 0                    | 0                    | 0                    | 0                    | 0                    | 0                    | 0                    | 0                    | 0                    | 0                    | 0                    |
| Uganda                                  | $2.1 \times 10^3$    | $1.6 \times 10^3$    | $4.6 \times 10^2$    | $1.8 \times 10^2$    | $5.7 \times 10^2$    | $1.1 \times 10^2$    | $1.9 \times 10^2$    | $1.7 \times 10^2$    | $1.1 \times 10^2$    | $5.0 \times 10^1$    | $3.1 \times 10^1$    | $1.8 \times 10^1$    | $3.0 \times 10^1$    | $1.8 \times 10^1$    | $1.3 \times 10^1$    | $1.9 \times 10^1$    |
| Ukraine                                 | $1.3 \times 10^3$    | $1.8 \times 10^2$    | $6.3 \times 10^1$    | $7.1 \times 10^1$    | $1.8 \times 10^2$    | $4.1 \times 10^1$    | $7.0 \times 10^1$    | $7.1 \times 10^1$    | $2.0 \times 10^1$    | $2.3 \times 10^1$    | $1.4 \times 10^1$    | $1.1 \times 10^1$    | $1.2 \times 10^1$    | $7.7 \times 10^0$    | $6.8 \times 10^0$    | $1.3 \times 10^1$    |
| United Arab Emirates                    | $4.2 \times 10^1$    | $6.7 \times 10^0$    | $5.8 \times 10^0$    | $9.2 \times 10^0$    | $5.6 \times 10^1$    | $2.9 \times 10^0$    | $1.9 \times 10^1$    | $8.4 \times 10^0$    | $1.4 \times 10^0$    | $5.7 \times 10^0$    | $6.7 \times 10^0$    | $2.1 \times 10^0$    | $2.3 \times 10^0$    | $4.3 \times 10^0$    | $6.5 \times 10^{-1}$ | $7.4 \times 10^0$    |
| United Kingdom                          | $4.3 \times 10^2$    | $4.8 \times 10^1$    | $2.8 \times 10^1$    | $2.3 \times 10^1$    | $7.0 \times 10^1$    | $1.2 \times 10^1$    | $2.7 \times 10^1$    | $2.2 \times 10^1$    | $6.8 \times 10^0$    | $8.7 \times 10^0$    | $6.4 \times 10^0$    | $4.0 \times 10^0$    | $4.1 \times 10^0$    | $3.1 \times 10^0$    | $2.7 \times 10^0$    | $5.6 \times 10^0$    |
| United States                           | $4.2 \times 10^3$    | $1.6 \times 10^3$    | $5.9 \times 10^2$    | $2.5 \times 10^2$    | $8.1 \times 10^2$    | $1.5 \times 10^2$    | $3.2 \times 10^2$    | $2.6 \times 10^2$    | $1.2 \times 10^2$    | $8.4 \times 10^1$    | $4.8 \times 10^1$    | $3.7 \times 10^1$    | $4.3 \times 10^1$    | $3.6 \times 10^1$    | $2.8 \times 10^1$    | $3.6 \times 10^1$    |
| Uruguay                                 | $1.4 \times 10^2$    | $5.4 \times 10^1$    | $1.7 \times 10^1$    | $7.3 \times 10^0$    | $2.3 \times 10^1$    | $4.7 \times 10^0$    | $8.0 \times 10^0$    | $6.9 \times 10^0$    | $3.8 \times 10^0$    | $2.1 \times 10^0$    | $1.3 \times 10^0$    | $7.9 \times 10^{-1}$ | $1.1 \times 10^0$    | $6.1 \times 10^{-1}$ | $5.4 \times 10^{-1}$ | $8.7 \times 10^{-1}$ |
| Uzbekistan                              | $3.7 \times 10^2$    | $2.5 \times 10^1$    | $1.9 \times 10^1$    | $1.2 \times 10^1$    | $3.5 \times 10^1$    | $9.2 \times 10^0$    | $1.8 \times 10^1$    | $1.3 \times 10^1$    | $5.5 \times 10^0$    | $7.1 \times 10^0$    | $3.2 \times 10^0$    | $2.6 \times 10^0$    | $1.8 \times 10^0$    | $1.1 \times 10^0$    | $2.7 \times 10^0$    | $3.8 \times 10^0$    |
| Vanuatu                                 | $5.0 \times 10^0$    | $3.8 \times 10^0$    | $1.1 \times 10^0$    | $4.2 \times 10^{-1}$ | $1.3 \times 10^0$    | $2.7 \times 10^{-1}$ | $4.3 \times 10^{-1}$ | $3.9 \times 10^{-1}$ | $2.6 \times 10^{-1}$ | $1.2 \times 10^{-1}$ | $7.4 \times 10^{-2}$ | $4.1 \times 10^{-2}$ | $7.0 \times 10^{-2}$ | $4.0 \times 10^{-2}$ | $2.8 \times 10^{-2}$ | $4.5 \times 10^{-2}$ |
| Venezuela                               | $9.5 \times 10^2$    | $1.1 \times 10^2$    | $3.8 \times 10^1$    | $3.6 \times 10^1$    | $1.1 \times 10^2$    | $1.5 \times 10^1$    | $4.0 \times 10^1$    | $3.2 \times 10^1$    | $6.1 \times 10^0$    | $8.0 \times 10^0$    | $6.9 \times 10^0$    | $4.0 \times 10^0$    | $4.1 \times 10^0$    | $7.7 \times 10^0$    | $3.2 \times 10^0$    | $7.9 \times 10^0$    |
| Vietnam                                 | $4.2 \times 10^3$    | $1.6 \times 10^3$    | $6.7 \times 10^2$    | $3.9 \times 10^2$    | $1.0 \times 10^3$    | $2.0 \times 10^2$    | $5.5 \times 10^2$    | $4.2 \times 10^2$    | $1.4 \times 10^2$    | $1.1 \times 10^2$    | $7.2 \times 10^1$    | $6.8 \times 10^1$    | $8.4 \times 10^1$    | $5.2 \times 10^1$    | $2.9 \times 10^1$    | $5.1 \times 10^1$    |
| Wallis and Futuna                       | 0                    | 0                    | 0                    | 0                    | 0                    | 0                    | 0                    | 0                    | 0                    | 0                    | 0                    | 0                    | 0                    | 0                    | 0                    | 0                    |
| Western Sahara                          | 0                    | 0                    | 0                    | 0                    | 0                    | 0                    | 0                    | 0                    | 0                    | 0                    | 0                    | 0                    | 0                    | 0                    | 0                    | 0                    |
| Yemen                                   | $3.2 \times 10^2$    | $3.3 \times 10^1$    | $6.7 \times 10^0$    | $1.1 \times 10^1$    | $2.5 \times 10^1$    | $4.6 \times 10^0$    | $7.2 \times 10^0$    | $7.6 \times 10^0$    | $1.9 \times 10^0$    | $1.4 \times 10^0$    | $8.2 \times 10^{-1}$ | $7.4 \times 10^{-1}$ | $8.5 \times 10^{-1}$ | $5.4 \times 10^{-1}$ | $3.4 \times 10^{-1}$ | $9.4 \times 10^{-1}$ |
| Zambia                                  | $1.6 \times 10^3$    | $5.8 \times 10^2$    | $2.9 \times 10^2$    | $1.2 \times 10^2$    | $3.7 \times 10^2$    | $6.5 \times 10^1$    | $2.0 \times 10^2$    | $1.5 \times 10^2$    | $4.1 \times 10^1$    | $2.9 \times 10^1$    | $1.3 \times 10^1$    | $1.9 \times 10^1$    | $1.8 \times 10^1$    | $3.6 \times 10^1$    | $2.1 \times 10^1$    | $1.2 \times 10^1$    |
| Zimbabwe                                | $7.9 \times 10^2$    | $4.2 \times 10^2$    | $1.5 \times 10^2$    | $9.1 \times 10^1$    | $2.4 \times 10^2$    | $4.6 \times 10^1$    | $1.0 \times 10^2$    | $7.8 \times 10^1$    | $3.3 \times 10$      |                      |                      |                      |                      |                      |                      |                      |

Table S7. Regional PAH16 emissions by sectors in 2007.

| Region                   | Resid./Commer. | Deforestation/Wildfire | Road trans. | Agriculture | Energy/Industry | Total emission | Per capita total emission | Per capita anthropogenic emission | Per capita energy consumption |
|--------------------------|----------------|------------------------|-------------|-------------|-----------------|----------------|---------------------------|-----------------------------------|-------------------------------|
| Units                    | ton            | ton                    | ton         | ton         | ton             | ton            | g/cap                     | g/cap                             | toe/cap <sup>a</sup>          |
| South and Southeast Asia | 111099         | 6742                   | 14566       | 4851        | 1998            | 139256         | 71                        | 71                                | 0.6                           |
| East Asia                | 67441          | 410                    | 14590       | 6024        | 22621           | 111086         | 73                        | 73                                | 1.3                           |
| West and Central Asia    | 3746           | 70                     | 7358        | 2511        | 929             | 14614          | 46                        | 46                                | 6.1                           |
| West and Central Africa  | 40746          | 8412                   | 1732        | 61          | 70              | 51020          | 156                       | 142                               | 1.2                           |
| East and South Africa    | 26382          | 10313                  | 1888        | 254         | 496             | 39332          | 174                       | 121                               | 1.9                           |
| Northern Africa          | 27644          | 1929                   | 2943        | 755         | 292             | 33564          | 99                        | 94                                | 1.6                           |
| South America            | 10281          | 22110                  | 7844        | 1525        | 1737            | 43496          | 123                       | 106                               | 1.9                           |
| North America            | 8958           | 3036                   | 4394        | 545         | 907             | 17840          | 43                        | 36                                | 5.6                           |
| Central America          | 4970           | 159                    | 636         | 15          | 13              | 5792           | 144                       | 144                               | 0.4                           |
| Europe                   | 16112          | 2108                   | 8075        | 2490        | 5134            | 33918          | 48                        | 45                                | 3.4                           |
| Caribbean                | 742            | 19                     | 279         | 37          | 22              | 1099           | 37                        | 37                                | 1.9                           |
| Oceania                  | 1772           | 1041                   | 230         | 120         | 241             | 3404           | 114                       | 69                                | 13.7                          |

**Note**

<sup>a</sup>. "toe" is ton oil equivalent.

## References

- (1) Wang, R.; Tao, S.; Ciais, P.; Shen, H. Z.; Huang, Y.; Chen, H.; Shen, G. F.; Wang, B.; Li, W.; Zhang, Y. Y.; Lu, Y.; Zhu, D.; Chen, Y. C.; Liu, X. P.; Wang, W. T.; Wang, X. L.; Liu, W. X.; Li, B. G.; Piao, S. L. High resolution mapping of combustion processes and implications for CO<sub>2</sub> emissions. *Atmos. Chem. Phys. Discuss.* **2012**, *12*, 21211–21239.
- (2) U.S. Energy Information Administration. *International Energy Statistics*; <http://www.eia.gov/countries/data.cfm> (accessed March 8, 2012).
- (3) World Steel Association. <http://www.worldsteel.org> (accessed March 8, 2012).
- (4) International Energy Agency. *IEA World Energy Statistics and Balances*; <http://www.oecd-ilibrary.org/statistics> (accessed July 17, 2011).
- (5) United Nations Industrial Development Organization (UNIDO). *International Yearbook of Industrial Statistics 2008*. Edward Elgar Publishing: Cheltenham, U.K., 2008.
- (6) U.S. Geological Survey. *Commodity Statistics and Information*; <http://minerals.usgs.gov/minerals/pubs/commodity> (accessed March 8, 2012).
- (7) National Oceanic and Atmospheric Administration (NOAA). *Global Gas Flaring Estimates*; [http://www.ngdc.noaa.gov/dmsp/interest/gas\\_flares.html](http://www.ngdc.noaa.gov/dmsp/interest/gas_flares.html) (accessed February 27, 2012).
- (8) United Nations Statistics Division (UNSD). *Environmental Indicators: Waste*; <http://unstats.un.org/unsd/environment/qindicators.htm> (accessed July 17, 2011).
- (9) Food and Agriculture Organization of the United Nations (FAO). *FAOSTAT*; <http://faostat.fao.org/site/291/default.aspx> (accessed March 8, 2012).
- (10) The Energy and Resources Institute. *TERI Energy Data Directory and Yearbook, 2007*. TERI Press: New Delhi, India, 2008.
- (11) Endresen, Ø.E.; Sørsgård, H.L.; Behrens, P.O.; Brett, P.O.; Isaksen, I.S.A. A historical reconstruction of ships' fuel consumption and emissions. *J. Geophys. Res.* **2007**, *112*, D12301; DOI 10.1029/2006JD007630.
- (12) Van der Werf, G.R.; Randerson, J.T.; Giglio, L.; Collatz, G.J.; Mu, M.; Kasibhatla, P.S.; Morton, D.C.; DeFries, R.S.; Jin, Y.; Van Leeuwen, T.T. Global fire emissions and the contribution of deforestation, savanna, forest, agricultural, and peat fires (1997-2009). *Atmos. Chem. Phys. Discuss.* **2010**, *10*, 16153-16230.
- (13) Shen, H.Z.; Tao, S.; Wang, R.; Wang, B.; Shen, G.F.; Li, W.; Su, S.S.; Huang, Y.; Wang, X.L.; Liu, W.X.; Li, B.G.; Sun, K. Global time trends in PAH emissions from motor vehicles. *Atmos. Environ.* **2011**, *45*, 2067-2073.
- (14) Bond, T.C.; Bhardwaj, E.; Dong, R.; Jogani, R.; Jung, S.; Roden, C.; Streets, D.G.; Trautmann, N.M. Historical emissions of black and organic carbon aerosol from energy-related combustion, 1850-2000. *Global Biogeochem. Cycles* **2007**, *21*, GB2018; DOI 10.1029/2006GB002840.
- (15) China Energy Group. *China Energy Databook Version 7.0*; Lawrence Berkeley Lab. and Energy Res. Inst.: Berkeley, California, 2008.
- (16) U.S. Geological Survey. *Primary Aluminum Plants Worldwide-1998*; <http://minerals.usgs.gov/minerals> (accessed March 8, 2012).
- (17) GENISIM. *Aluminum Smelters*; <http://www.genisim.com/aluminum/smelters/smelters.htm> (accessed March 8, 2012).
- (18) Zhang, Y.X.; Tao, S. Global atmospheric emission inventory of polycyclic aromatic hydrocarbons (PAHs) for 2004. *Atmos. Environ.* **2009**, *43*, 812-819.
- (19) U.S. Environmental Protection Agency. *Clearinghouse for Inventories & Emissions factors*; <http://www.epa.gov/ttn/chieff/index.html> (accessed July 17, 2011).
- (20) National Atmospheric Emissions Inventory (NAEI). [http://naei.defra.gov.uk/data\\_warehouse.php](http://naei.defra.gov.uk/data_warehouse.php)

(accessed July 17, 2011).

- (21) European Environmental Agency (EEA). *National emissions reported to the Convention on Long-range Transboundary Air Pollution (LRTAP Convention)*; <http://www.eea.europa.eu/data-and-maps/data/national-emissions-reported-to-the-convention-on-long-range-transboundary-air-pollution-lrtap-convention-5> (accessed March 16, 2012).
